# Supplementary material
Source: HighWire-hosted journal article supplement (https://gut.bmj.com/content/68/3/499)
Supplement: inline-supplementary-material-3 [file inline-supplementary-material-3.xlsx]

## Sheet: LCM raw counts
	Epithelium	Epithelium	Epithelium	Epithelium	Epithelium	Epithelium	Epithelium	Epithelium	Epithelium	Epithelium	Epithelium	Epithelium	Epithelium	Epithelium	Epithelium	Epithelium	Epithelium	Epithelium	Epithelium	Epithelium	Epithelium	Epithelium	Epithelium	Epithelium	Epithelium	Epithelium	Epithelium	Epithelium	Epithelium	Epithelium	Epithelium	Epithelium	Epithelium	Epithelium	Epithelium	Epithelium	Epithelium	Epithelium	Epithelium	Epithelium	Epithelium	Epithelium	Epithelium	Epithelium	Epithelium	Epithelium	Epithelium	Epithelium	Epithelium
LncRNA ID	HSH1	KC183	KC181	KC011	KC013	KC015	KC017	KC020	KC023	KC025	KC028	HSH3	KC030	KC032	KC044	KC046	KC048	KC051	KC055	KC059	KC061	KC063	HSH5	KC065	KC067	KC069	KC071	KC073	KC075	KC079	KC081	KC083	KC085	KC142	KC087	KC089	KC091	KC093	KC095	KC105	KC121	KC123	KC127	KC130	KC077	KC132	KC134	KC146	KC151
LNC3	0	0	0	0	0	0	0	0	0	0	1	0	0	0	0	0	0	0	0	0	0	0	0	0	0	0	0	0	0	0	0	0	0	0	0	0	0	0	0	0	0	0	0	0	0	0	0	0	0
LNC4	0	0	0	0	0	1	1	0	0	0	1	0	0	0	0	0	0	0	0	0	0	0	0	4	0	0	0	0	0	0	0	0	0	0	0	0	0	0	0	0	0	0	0	0	0	0	0	0	0
LNC5	0	0	0	0	0	0	0	0	0	0	0	0	0	0	0	0	0	0	0	0	0	0	0	0	0	0	0	0	0	0	0	0	0	0	0	0	0	0	0	0	0	0	0	0	0	0	0	0	0
LNC7	0	0	0	0	0	0	0	0	0	0	0	0	0	0	28	0	0	0	0	0	0	0	0	0	0	0	0	0	0	0	0	0	0	0	0	0	0	0	0	0	0	0	0	0	0	0	0	0	0
LNC8	0	0	0	0	0	0	1	0	0	0	0	0	0	0	0	0	0	0	0	0	0	0	0	0	0	0	0	0	0	0	0	0	0	0	0	1	0	0	0	4	0	0	0	0	0	0	0	0	0
LNC9	0	0	0	0	0	0	0	0	0	0	0	0	0	0	0	0	0	0	0	0	0	0	1	0	0	0	0	0	0	0	0	0	1	0	0	0	0	0	0	0	0	0	0	0	0	0	0	0	0
LNC13	0	0	0	0	0	0	0	0	0	0	0	8	0	0	0	0	0	0	0	0	0	0	0	0	0	0	0	0	0	0	0	0	0	0	0	0	0	0	0	0	0	0	1	0	0	0	0	0	0
LNC14	1	0	0	5	0	10	0	0	0	0	0	1	5	1	0	1	0	0	1	0	1	3	0	2	0	2	0	0	0	1	0	0	0	1	1	1	0	0	0	0	4	1	0	0	0	1	1	3	5
LNC15	17	0	0	0	0	1	0	0	0	0	1	1	0	0	0	0	0	0	4	0	0	0	0	0	0	0	11	0	0	0	0	0	0	3	0	0	0	0	0	0	0	8	0	0	1	49	0	0	6
LNC16	36	2	42	0	12	62	0	2	0	45	1	9	17	19	0	3	6	0	0	2	0	0	0	0	0	9	18	0	7	11	0	125	6	0	5	0	2	0	5	2	0	36	4	0	5	0	21	25	65
LNC22	0	0	5	0	0	2	0	0	0	0	0	0	0	0	0	0	0	0	0	3	0	0	0	0	0	0	0	2	1	7	0	0	0	0	0	0	0	0	0	39	0	0	0	0	0	0	0	2	3
LNC24	0	0	0	0	0	1	0	2	0	0	0	0	0	2	0	0	0	0	0	0	0	0	0	0	0	0	0	0	0	0	0	0	0	0	0	0	0	0	0	0	0	0	2	0	0	0	0	0	0
LNC26	0	0	0	1	0	9	6	0	0	8	1	0	0	0	0	0	0	0	0	0	0	0	0	0	0	1	3	0	0	0	0	0	0	0	0	5	0	0	50	0	0	0	0	0	0	0	0	0	4
LNC27	4	0	0	0	65	6	71	75	0	0	0	0	0	18	0	11	1	1	0	1	0	0	0	2	7	9	12	12	13	1	0	4	17	5	1	10	13	72	2	0	0	12	0	0	33	0	1	1	13
LNC29	0	0	0	0	0	2	0	0	0	4	0	0	0	0	0	0	0	0	0	0	0	0	0	0	0	1	0	0	0	0	0	0	0	0	0	0	0	0	0	0	0	2	0	0	0	0	1	0	1
LNC31	0	0	0	0	10	19	0	0	0	0	0	0	0	3	0	6	0	0	0	0	0	0	0	0	0	0	0	0	0	0	0	0	0	0	0	12	1	0	3	1	1	0	0	1	0	0	0	0	0
LNC47	0	0	0	0	0	0	12	0	0	1	77	0	1	0	1	6	2	0	0	0	0	0	0	0	0	0	0	1	20	0	0	0	5	0	0	1	3	2	33	3	0	6	0	0	0	0	22	0	0
LNC49	0	0	0	0	0	3	0	0	0	1	0	0	0	0	0	0	0	0	0	0	0	0	0	0	0	0	1	0	1	0	0	1	0	0	0	0	1	0	1	0	0	0	0	0	0	0	0	0	0
LNC53	1	0	0	6	0	19	2	88	0	0	34	0	0	0	0	0	0	0	0	0	0	0	0	0	0	0	0	0	2	0	0	2	0	0	0	9	0	0	0	19	0	0	11	2	0	2	0	55	0
LNC58	0	1	57	0	0	17	5	26	0	0	18	4	24	3	0	79	36	31	0	73	0	8	82	42	1	23	22	2	10	1	1	1	0	18	2	0	10	2	36	49	25	4	5	0	0	2	32	24	2
LNC61	0	0	0	0	0	0	0	0	0	0	0	1	0	0	0	8	0	0	0	0	0	0	33	0	0	3	0	2	0	0	0	0	0	0	0	8	0	0	14	0	0	6	0	0	0	0	0	0	1
LNC71	0	0	0	0	2	2	0	0	0	0	0	0	0	0	0	0	0	0	0	0	0	0	0	0	10	14	0	0	3	0	0	0	0	0	0	0	0	0	0	0	0	0	2	0	0	0	0	0	0
LNC79	0	4	10	31	12	29	11	4	21	0	1	0	0	3	14	13	1	0	0	0	0	0	2	0	3	3	8	1	4	18	1	1	3	0	6	0	19	16	17	13	5	23	4	5	1	6	4	3	0
LNC121	84	41	36	44	100	90	35	5	5	28	13	13	2	22	13	48	0	11	1	6	2	3	0	38	0	17	23	45	6	32	7	17	4	7	24	5	3	5	40	63	22	1	32	1	0	0	31	0	20
LNC124	0	0	5	0	26	56	31	0	0	0	2	0	0	23	4	3	1	0	1	6	0	1	0	0	0	8	14	0	0	0	7	0	0	2	0	0	1	1	3	1	14	0	0	1	5	1	0	38	13
LNC125	0	47	2	0	11	42	43	62	0	2	14	79	2	8	5	2	0	0	0	1	0	14	31	7	0	27	2	2	0	0	43	32	22	9	4	0	15	79	0	3	15	0	5	11	17	132	6	29	33
LNC126	43	2	0	2	0	14	0	1	35	0	0	0	0	17	3	0	1	0	0	1	0	0	2	0	0	3	0	0	0	0	0	0	28	0	0	10	2	0	0	0	0	1	0	23	0	0	0	0	0
LNC165	7	0	0	0	0	1	0	0	0	0	4	0	0	21	0	9	0	23	0	7	0	0	0	5	0	1	0	0	0	6	1	10	1	1	0	5	0	0	0	0	0	0	0	0	0	4	0	0	0
LNC167	25	11	16	0	1	11	2	9	14	7	5	0	2	10	1	8	0	0	0	1	0	0	41	12	5	1	0	0	0	0	1	0	1	10	0	1	0	1	4	0	5	0	0	0	0	12	0	1	2
LNC172	0	0	0	0	0	0	0	0	0	0	0	0	0	0	0	0	0	0	0	0	0	0	0	0	0	0	0	0	0	0	0	0	0	0	0	0	0	0	0	0	0	0	0	0	0	0	0	0	0
LNC174	0	0	0	0	0	3	0	0	0	0	0	1	0	0	0	0	0	0	0	0	0	0	0	0	0	0	0	0	0	0	0	0	0	0	0	0	0	0	0	0	0	0	0	0	0	0	0	0	0
LNC175	0	0	0	0	0	0	0	0	0	0	0	0	0	0	0	0	6	0	0	0	0	0	0	0	0	4	0	0	0	0	0	0	0	0	0	0	3	0	0	0	0	0	0	0	0	0	0	0	0
LNC176	308	57	5	21	58	131	7	49	74	32	26	5	52	53	1	25	103	33	86	67	37	3	40	27	3	26	92	1	6	67	7	17	5	3	2	20	35	19	32	8	26	12	71	39	11	26	11	2	39
LNC177	0	0	0	1	0	8	3	1	1	5	6	2	0	1	2	5	0	0	0	0	1	0	0	0	0	0	2	0	0	0	1	0	0	0	0	1	0	0	5	0	1	0	1	0	0	0	1	0	1
LNC179	0	13	0	0	18	67	6	26	0	53	3	25	0	3	26	34	26	0	0	22	2	3	0	9	10	16	48	50	21	0	2	0	5	7	16	5	0	9	50	0	0	3	3	6	31	0	5	2	6
LNC183	0	49	86	2	50	52	60	181	27	163	15	156	55	27	11	158	38	11	8	8	6	13	24	40	0	21	90	16	26	2	12	4	6	24	0	52	39	24	19	16	12	5	10	1	21	4	16	23	24
LNC197	118	3	1	25	40	175	14	53	14	53	1	0	28	46	196	59	125	106	40	41	0	92	0	100	1	5	18	1	72	31	0	16	28	51	70	4	64	0	219	21	0	0	0	1	1	47	27	4	14
LNC200	5	0	0	2	0	3	2	0	0	2	0	0	0	0	3	4	0	3	0	1	0	1	0	2	0	0	7	0	6	0	0	0	1	0	1	0	0	0	13	0	0	0	0	0	0	0	0	0	1
LNC212	83	199	597	203	328	18	305	215	0	450	34	128	343	444	84	1298	187	80	18	109	590	205	159	1140	7	305	668	105	571	804	386	85	191	669	13	214	312	1170	337	523	198	393	111	0	244	59	386	75	422
LNC213	0	25	5	0	61	20	1	0	51	9	13	214	3	14	7	17	36	1	4	0	18	0	3	22	19	8	2	6	22	11	56	18	0	8	3	8	6	14	18	44	36	11	29	1	4	26	6	53	16
LNC214	0	1	0	50	5	40	89	8	27	15	118	71	39	25	0	4	19	1	4	6	11	152	6	29	4	6	75	20	33	0	9	2	14	12	1	4	37	0	27	87	0	9	7	0	20	3	120	0	9
LNC259	0	0	0	0	0	0	28	0	0	0	0	0	0	0	0	0	0	0	0	0	0	0	8	13	19	0	4	0	0	0	1	1	0	4	3	0	0	0	0	0	0	0	0	0	0	0	0	0	0
LNC260	0	0	0	0	0	14	0	24	15	16	4	1	0	0	0	1	0	0	0	0	0	0	0	1	7	2	0	0	0	8	0	40	0	1	0	0	4	0	0	0	2	19	0	0	0	0	0	5	1
LNC271	2	25	54	0	126	98	54	96	7	3	64	31	132	19	6	184	41	42	0	17	46	1	42	10	3	42	4	82	62	150	23	34	44	4	111	11	200	13	133	6	5	5	1	27	69	98	370	35	8
LNC277	0	0	0	0	0	0	0	3	9	0	0	0	1	0	0	25	1	0	0	0	0	0	0	0	0	0	4	0	0	45	4	0	0	0	0	0	1	0	6	0	3	0	0	0	0	0	0	0	0
LNC285	0	8	0	5	0	5	0	1	0	0	9	0	0	23	37	0	1	8	3	0	0	0	0	93	0	9	0	0	0	48	1	6	0	0	1	0	0	0	0	0	5	2	0	0	6	0	0	0	0
LNC286	0	0	1	0	0	1	14	0	0	1	0	0	0	0	0	4	0	0	0	0	0	1	0	7	0	1	1	0	0	0	0	0	0	2	0	0	1	0	1	0	0	0	0	0	0	1	1	0	0
LNC291	8	21	34	2	9	34	0	0	5	117	26	49	5	16	14	5	12	1	4	72	21	1	11	58	8	16	2	2	25	29	7	17	0	11	3	1	3	1	10	1	84	0	22	3	1	2	15	24	6
LNC296	0	0	0	0	2	1	0	2	0	0	0	0	0	3	0	0	0	0	0	0	0	0	0	0	0	0	0	0	2	3	0	0	0	0	0	1	0	0	0	0	0	11	0	0	1	0	0	0	0
LNC305	0	0	41	19	0	16	5	9	70	61	57	10	3	43	35	0	12	0	7	2	0	0	6	75	144	1	5	13	9	7	29	0	0	5	5	0	0	4	21	6	1	15	69	26	0	5	13	0	23
LNC311	0	0	0	0	0	2	20	1	0	2	0	0	0	0	1	0	0	0	0	0	0	0	0	0	0	0	1	1	1	0	0	3	0	0	0	0	0	9	0	1	0	0	0	0	0	0	0	0	0
LNC315	1	2	0	1	2	1	12	6	3	0	8	0	2	0	1	0	6	0	7	4	0	1	1	4	3	1	1	5	3	4	6	10	3	1	4	4	5	5	11	5	2	5	3	13	6	0	7	0	3
LNC320	3	19	20	23	0	27	1	15	4	6	48	2	0	9	2	95	36	1	1	20	65	2	17	3	0	6	28	0	7	62	0	2	2	6	4	10	23	36	6	1	9	12	0	0	5	21	12	10	1
LNC336	0	0	0	0	0	0	0	9	0	0	0	0	0	0	0	0	0	0	0	0	0	0	0	31	0	0	0	0	1	0	0	0	0	0	0	0	0	0	0	0	0	0	0	0	0	0	0	0	0
LNC338	0	0	0	0	0	4	7	22	0	0	42	0	0	0	12	21	12	0	0	0	0	0	0	0	0	0	0	0	20	0	0	10	1	5	0	0	0	0	0	52	0	0	6	0	0	0	0	0	1
LNC352	0	0	16	0	0	0	0	1	0	1	2	0	0	0	11	4	0	0	0	1	58	159	0	3	0	1	0	0	0	0	0	2	0	0	0	0	0	1	14	48	0	0	0	15	0	1	0	2	0
LNC358	5	10	147	13	115	142	104	101	83	146	17	55	30	129	89	57	11	27	84	27	8	18	55	79	32	42	48	31	123	30	28	28	46	10	11	15	48	10	97	60	34	8	73	26	6	36	49	22	48
LNC377	0	60	0	0	2	2	0	1	0	0	0	0	4	1	11	28	0	0	0	0	0	0	0	0	0	0	0	0	4	0	0	0	0	0	0	0	1	0	0	39	1	0	0	0	0	10	26	0	1
LNC383	4	21	26	5	28	3	16	22	37	0	0	34	0	8	39	74	6	16	0	21	1	16	10	3	0	9	7	1	2	3	5	10	15	23	3	6	2	111	17	37	6	26	34	0	0	9	70	18	5
LNC406	11	10	22	6	3	8	12	16	10	5	1	1	6	6	4	24	19	3	21	31	15	11	13	6	6	5	5	15	20	15	29	11	0	7	10	16	14	12	18	10	8	12	9	12	10	16	33	3	2
LNC410	0	2	0	68	0	8	4	2	0	1	2	0	2	0	12	3	0	0	1	0	0	0	1	1	0	0	0	1	0	3	2	0	0	1	87	0	0	0	0	0	3	0	5	0	0	0	16	16	1
LNC411	1	0	0	0	26	13	2	0	0	0	1	0	0	2	0	0	0	0	0	0	0	5	0	33	0	0	0	53	3	0	0	0	0	2	0	0	0	18	0	2	0	0	0	17	0	0	37	0	1
LNC414	0	0	0	0	0	0	0	0	0	0	0	0	0	0	0	1	0	0	1	4	0	0	0	0	1	0	0	0	0	0	0	0	0	0	0	0	0	0	3	0	0	0	4	0	0	0	0	0	0
LNC421	162	111	136	86	22	161	18	63	46	7	39	23	19	45	11	55	60	25	46	53	66	139	38	243	5	66	61	35	54	13	60	0	44	35	24	32	62	68	46	60	25	63	114	156	89	23	201	30	60
LNC422	0	3	16	0	12	11	33	79	0	25	82	0	48	23	2	83	155	0	1	2	40	12	13	0	0	7	71	8	10	13	3	48	10	20	1	9	2	44	1	64	0	15	14	0	8	43	164	0	10
LNC427	80	88	81	191	123	223	171	118	64	46	67	287	180	165	124	264	35	212	217	76	108	174	119	246	41	128	165	68	17	211	96	22	102	136	96	94	69	93	74	175	52	99	116	69	92	211	209	219	177
LNC430	0	0	0	0	0	0	0	0	5	0	1	0	0	0	0	0	0	0	7	0	0	0	0	0	26	0	0	0	0	0	0	0	0	0	0	0	0	0	0	0	3	0	0	0	0	0	0	0	0
LNC439	1625	403	629	155	514	1060	433	269	862	237	266	4	524	218	634	449	589	55	830	316	100	267	262	641	441	212	1006	467	1242	806	742	505	134	328	478	2202	1348	1704	2603	3220	559	2959	1026	3605	1666	1099	1982	208	277
LNC445	0	47	17	6	37	115	89	237	0	0	41	4	3	17	72	40	122	0	7	41	0	82	32	267	20	19	23	41	18	16	17	12	23	72	91	22	52	13	5	69	3	12	39	60	9	2	22	20	23
LNC465	0	1	0	1	0	1	0	1	2	0	0	0	0	0	0	0	1	0	0	0	0	3	0	4	0	51	0	0	0	0	0	0	1	0	0	7	1	0	0	0	0	0	0	0	0	0	0	0	0
LNC468	60	0	0	0	0	4	0	4	0	0	0	29	0	0	0	3	0	0	0	0	0	0	2	0	0	0	2	1	8	0	0	0	0	0	0	0	2	0	6	0	0	2	0	0	6	0	0	0	0
LNC476	0	0	0	0	0	0	3	0	0	0	2	0	0	3	5	0	3	0	0	0	0	0	1	1	0	0	0	0	0	0	0	0	0	0	0	1	1	2	0	0	0	0	0	0	1	0	0	0	0
LNC477	0	10	10	0	0	46	1	3	0	0	1	0	0	3	0	0	0	0	1	0	0	2	0	0	0	0	56	0	0	11	1	0	0	0	1	0	5	0	3	0	0	2	0	0	0	0	0	1	0
LNC478	0	0	0	0	0	0	0	0	0	0	0	0	0	0	0	0	0	0	0	0	0	0	0	0	0	0	0	0	0	0	0	1	0	0	0	0	0	0	0	0	0	0	0	0	0	0	0	0	0
LNC480	27	2	2	12	5	33	3	0	0	4	27	1	0	5	66	2	1	0	0	0	0	10	0	1	0	0	4	0	0	0	0	17	4	0	0	2	0	2	0	3	0	0	0	23	6	2	0	3	5
LNC496	0	0	0	0	7	0	2	1	0	0	1	0	0	0	0	17	0	0	0	0	2	4	0	2	0	0	0	0	0	0	2	0	3	0	0	0	0	0	0	1	0	0	0	0	0	0	0	0	4
LNC499	1	10	13	2	0	6	10	27	4	8	7	0	42	1	0	3	0	0	0	2	3	1	0	0	0	0	10	75	7	0	2	0	0	11	0	3	12	0	5	4	0	0	0	0	3	0	2	0	2
LNC527	109	0	0	0	0	1	0	0	8	0	0	0	0	0	0	0	0	0	10	0	0	0	0	0	0	3	5	0	0	0	0	0	0	0	0	0	0	0	107	0	0	1	0	0	0	0	2	0	0
LNC533	0	0	1	34	0	2	0	1	3	0	7	0	0	2	0	0	0	0	0	0	0	0	1	0	4	1	0	0	1	5	0	0	0	0	0	0	0	0	0	0	0	3	0	3	12	0	0	0	0
LNC543	0	0	0	0	0	0	0	0	0	0	0	0	0	0	0	2	0	0	0	0	0	0	0	0	0	0	0	0	0	0	0	0	0	0	0	0	0	0	0	0	0	0	0	0	0	28	0	0	0
LNC545	0	0	5	0	0	0	14	12	0	0	10	1	16	0	0	8	51	0	0	1	1	0	0	16	0	0	0	4	8	0	0	0	0	0	8	0	0	1	7	7	2	55	0	15	0	0	0	0	18
LNC551	2633	3710	9047	6230	2735	14922	6738	7267	4371	5744	12350	5169	3819	17363	3358	2982	1533	21032	6511	30028	15440	11951	10978	44913	11565	8307	6586	3937	2056	17747	7805	10429	4589	13329	3670	3930	1690	4836	1948	3415	19008	2119	1078	1693	4388	6983	9487	5726	18126
LNC552	106628	78033	88858	106367	21185	138417	53466	50930	30338	29602	147762	76843	99750	139864	113922	23611	44837	406091	146728	481271	80664	180999	99452	780048	162371	32445	67804	41392	29667	311909	48414	71857	32727	53920	59834	51389	27879	64097	49442	29288	117947	49791	45845	48295	57151	106586	161351	88111	153282
LNC555	0	8	0	0	0	0	0	0	0	0	4	0	0	0	0	8	0	0	0	3	0	0	0	0	0	0	0	0	0	0	0	0	0	0	0	0	27	0	0	0	0	3	0	0	0	0	0	0	0
LNC570	0	5	0	0	0	1	35	1	0	0	20	0	0	0	0	1	3	0	0	0	0	0	0	0	0	1	0	0	0	0	0	0	0	1	0	1	0	0	0	0	0	0	0	0	0	0	4	0	0
LNC584	0	0	0	1	0	0	0	0	0	0	0	0	0	0	0	1	6	0	0	0	0	0	0	0	0	1	0	1	7	0	0	0	0	5	0	0	8	3	15	0	0	13	106	0	0	0	0	0	1
LNC585	0	0	0	0	0	2	0	0	0	0	0	0	0	0	0	0	0	0	0	0	0	0	0	0	0	0	0	0	0	0	0	0	0	0	0	0	0	0	0	0	0	0	0	0	0	0	0	0	0
LNC589	11	67	0	2	16	234	52	82	23	0	23	40	12	0	0	85	19	0	0	189	5	6	0	17	0	1	7	37	26	23	21	5	3	1	5	44	2	2	44	12	14	6	124	57	38	7	19	83	0
LNC607	0	37	19	0	0	0	18	0	31	0	0	0	0	1	0	32	89	0	0	3	0	0	0	0	0	4	5	0	10	5	1	0	8	0	0	0	19	35	1	0	0	5	0	17	0	0	0	0	0
LNC646	0	0	11	0	0	10	0	22	2	0	0	0	2	0	0	0	0	0	0	0	0	0	0	0	0	0	0	0	0	0	0	0	0	0	0	0	0	9	0	0	0	0	0	0	0	0	1	0	0
LNC652	0	0	0	0	0	6	39	1	0	0	0	0	0	0	0	2	0	0	0	0	0	0	0	0	0	0	0	0	0	0	0	0	0	0	0	0	0	16	0	0	0	0	0	0	0	0	0	0	0
LNC659	0	9	0	9	0	4	0	0	0	0	0	0	0	0	4	0	0	0	0	0	0	0	1	0	0	3	0	0	0	0	0	0	0	2	0	0	0	0	0	0	2	0	0	0	0	0	0	0	1
LNC661	0	16	25	45	6	67	16	9	0	1	46	33	26	0	110	32	37	0	0	22	0	1	67	24	29	21	0	13	0	47	2	0	22	4	13	1	11	3	14	0	0	44	0	1	1	53	0	12	0
LNC677	9	1	25	2	64	3	0	5	230	2	8	38	0	0	1	30	22	0	0	1	0	0	6	0	0	1	0	35	6	0	0	0	0	0	3	11	0	0	1	1	0	0	0	0	0	35	0	2	0
LNC680	0	40	33	211	22	69	32	49	72	9	36	6	151	66	57	128	428	7	64	114	69	8	19	223	2	29	42	1	14	304	94	51	1	43	33	144	2	19	2	16	87	96	249	65	36	362	64	0	0
LNC686	0	0	0	0	0	0	0	0	0	0	0	0	0	0	0	2	0	0	0	0	0	0	0	0	0	0	0	0	0	0	1	0	1	3	0	4	0	0	0	0	1	0	0	0	0	0	0	0	3
LNC696	0	11	0	0	23	109	0	73	0	1	1	1	0	21	4	10	0	0	0	115	0	10	2	31	0	1	1	0	3	0	1	22	2	0	3	13	6	0	8	13	0	1	4	6	19	41	10	1	17
LNC706	0	8	0	0	9	93	0	11	0	0	1	1	1	0	2	1	1	0	0	0	0	0	3	0	0	3	0	21	0	0	0	0	0	0	0	0	13	33	8	0	4	1	0	0	10	0	0	10	0
LNC712	0	31	3	75	53	42	80	2	0	6	84	12	304	23	2	109	35	1	0	12	0	0	88	28	14	59	19	1	113	17	61	1	100	72	8	31	170	100	0	0	3	118	64	1	57	39	0	7	81
LNC718	772	150	287	113	661	462	315	268	446	256	204	1	328	242	364	280	490	119	439	386	106	77	171	865	195	316	453	556	561	1254	662	383	59	76	431	1375	978	493	1269	874	301	2022	361	3105	779	700	841	162	339
LNC725	0	0	0	0	0	8	1	0	0	0	0	0	0	0	0	0	0	65	0	0	0	0	0	0	0	0	0	0	0	0	0	0	0	0	0	0	0	0	0	0	0	0	0	0	0	0	0	0	0
LNC751	0	0	0	0	0	2	0	19	0	0	14	0	0	0	0	0	0	0	0	0	0	0	0	0	0	0	0	25	0	0	0	0	3	0	0	0	2	0	0	0	1	0	0	0	0	0	0	0	3
LNC768	28	20	31	1	54	64	69	43	52	1	32	11	6	30	9	11	18	0	29	17	0	51	1	136	0	12	3	10	23	0	49	107	53	40	41	97	8	4	108	22	6	11	27	23	4	50	34	34	33
LNC777	0	0	0	0	0	0	0	0	0	0	2	0	0	0	0	0	3	0	1	0	0	0	0	0	0	0	0	0	1	0	0	0	0	0	0	0	0	0	0	0	0	0	0	0	0	0	0	0	0
LNC779	0	0	0	14	0	2	1	0	11	0	0	0	0	0	0	26	1	0	0	0	0	0	0	0	1	0	0	0	0	0	1	0	2	0	0	0	0	11	9	0	12	0	0	0	0	0	0	0	0
LNC794	17395	13328	19822	8595	7425	5341	9398	7888	10496	7796	5183	13133	9968	13922	5309	4882	4522	7159	6099	3891	2990	4371	16207	21130	7026	6858	9088	9159	8870	19492	12106	18398	7079	7993	9740	8825	8990	13778	14667	14215	5650	10082	11700	18737	10301	12537	11654	12574	17145
LNC831	0	0	0	0	14	3	6	1	3	0	0	0	2	0	0	0	0	0	0	0	0	5	0	1	0	1	0	0	0	0	0	0	0	0	0	0	1	0	21	0	0	0	0	0	0	0	0	0	0
LNC839	14	0	10	1	0	12	2	0	0	3	14	0	27	13	6	8	3	4	5	0	0	0	4	12	0	11	2	0	0	23	0	0	8	4	0	83	1	2	6	5	2	2	0	0	0	0	6	3	8
LNC855	1	0	4	0	0	9	10	0	0	0	6	0	9	10	0	3	0	0	2	0	0	0	0	0	0	0	0	0	0	0	1	0	11	181	0	2	21	0	0	0	0	0	0	1	1	0	0	1	0
LNC875	10	23	27	0	1	115	0	9	4	0	6	25	87	13	3	130	48	0	33	20	0	14	11	288	3	10	41	4	10	32	39	26	35	4	31	15	26	19	27	38	15	2	1	3	54	60	4	16	36
LNC878	0	0	40	0	0	9	35	0	1	1	0	0	0	4	1	0	0	0	0	0	0	103	0	0	22	0	0	0	0	0	0	0	0	0	0	0	1	0	0	2	0	17	0	4	0	162	0	0	38
LNC881	99	1	14	5	66	3	74	0	0	14	0	0	23	0	0	64	0	0	21	0	91	0	2	0	0	135	201	0	76	20	52	0	49	5	0	2	80	17	0	7	0	3	45	0	55	78	2	0	0
LNC886	0	0	0	13	0	42	0	0	0	4	0	0	1	0	0	0	7	0	0	1	1	0	0	166	0	1	0	0	1	0	0	0	1	0	104	0	0	0	0	0	0	0	0	0	0	0	17	0	3
LNC889	1	0	0	0	4	5	0	0	2	0	2	7	0	0	0	0	4	6	0	0	2	2	0	2	0	1	11	2	2	0	3	1	9	9	0	0	1	1	5	0	0	8	0	0	1	1	2	0	10
LNC891	2	0	1	14	12	92	11	1	3	0	8	15	16	1	0	13	1	11	0	1	10	0	0	15	33	12	3	14	11	0	3	5	1	1	6	0	46	1	39	30	1	13	0	8	0	11	0	2	28
LNC904	0	0	0	0	0	0	0	0	0	0	0	1	0	0	0	0	0	0	1	0	0	0	0	0	0	1	0	0	0	0	0	0	0	0	0	0	0	0	0	0	0	0	0	1	0	2	0	0	2
LNC924	591	75	177	256	55	89	299	297	41	128	97	705	168	231	112	292	263	116	178	69	34	187	261	321	103	52	117	172	230	672	94	360	130	194	123	85	147	121	111	244	58	125	184	340	142	129	250	83	244
LNC946	0	0	0	100	3	7	0	10	2	0	13	0	2	0	2	7	1	0	61	0	2	8	113	0	0	1	0	0	7	0	8	0	0	49	0	2	0	0	8	4	4	15	0	1	0	82	50	0	2
LNC988	5	1	17	3	1	44	1	19	0	1	79	250	11	0	44	3	13	2	0	2	0	5	0	185	29	24	0	0	4	51	4	5	7	0	0	11	0	13	3	0	0	0	1	2	10	0	0	1	0
LNC1000	29	12	1	0	6	90	0	0	2	0	6	2	0	10	5	0	0	1	0	0	0	0	0	0	2	1	0	0	0	0	0	0	1	1	10	1	0	0	28	3	0	0	20	0	0	0	7	0	4
LNC1012	0	0	0	21	1	2	0	3	13	0	5	2	0	0	0	7	0	0	0	0	0	2	7	7	0	0	0	5	0	0	0	1	0	4	23	0	0	9	8	0	0	6	1	0	2	4	0	0	7
LNC1025	251	2	1	1	0	103	0	24	26	34	3	28	2	8	21	65	5	0	101	1	83	21	44	62	7	7	4	1	0	12	0	1	4	0	1	85	14	15	108	18	5	0	0	1	9	58	27	16	39
LNC1027	2	0	0	0	0	23	0	0	20	0	10	0	0	0	3	1	1	0	0	0	0	0	0	0	0	0	0	0	0	0	0	0	1	0	0	0	0	0	0	0	0	0	0	0	0	0	0	1	0
LNC1028	393	0	0	9	359	1144	1	246	354	91	136	9	58	1	56	252	6	0	139	2	247	57	537	35	54	11	48	0	8	105	1	8	49	6	0	23	21	4	229	102	36	0	0	14	33	211	124	232	185
LNC1035	0	0	0	0	0	0	0	0	0	0	0	0	0	0	0	0	0	0	0	0	0	0	0	0	0	0	0	0	0	0	0	0	0	0	0	0	0	0	0	0	0	0	0	0	0	0	0	0	0
LNC1038	0	0	11	0	2	18	2	7	0	0	3	0	1	0	0	1	3	0	0	0	0	0	2	4	0	1	1	0	22	0	0	0	2	0	18	1	22	20	0	2	0	0	35	0	0	0	0	0	0
LNC1041	0	4	4	4	36	73	22	64	13	6	35	5	8	7	7	25	22	16	10	6	58	18	44	54	1	24	18	1	5	23	5	0	17	0	4	5	9	2	35	16	14	13	10	2	0	22	15	19	9
LNC1052	0	0	0	0	19	158	0	16	6	0	1	0	0	0	0	0	0	0	4	0	0	0	0	0	0	0	0	0	0	0	0	0	0	0	0	0	7	0	0	2	2	0	0	0	0	0	0	0	0
LNC1052	0	0	1	0	0	9	0	1	0	0	0	0	0	3	0	3	0	0	0	0	0	0	0	0	0	0	0	25	0	0	0	0	0	0	0	0	12	0	0	0	0	10	0	0	0	2	0	0	0
LNC1054	0	36	20	7	0	105	27	1	0	0	42	14	7	9	0	2	6	9	22	4	0	11	0	22	6	18	31	26	24	12	9	112	9	3	4	3	53	23	12	31	0	23	160	7	5	4	6	8	20
LNC1056	8	0	0	1	8	16	130	1	5	0	2	0	0	3	4	3	6	0	15	15	0	0	1	1	1	1	2	5	3	2	5	44	19	6	8	17	3	9	3	3	1	7	12	38	11	9	4	0	2
LNC1059	0	0	0	4	0	25	1	0	0	0	19	0	0	0	0	0	0	0	0	0	0	0	2	2	0	8	2	0	0	0	0	0	0	1	0	0	0	0	0	0	0	1	0	0	0	0	0	0	0
LNC1060	15	8	33	31	1	88	22	36	22	56	129	2	18	37	2	79	0	1	0	0	3	0	58	10	0	15	43	26	35	2	15	92	16	2	37	58	21	1	11	79	0	45	59	57	24	128	2	0	71
LNC1065	0	5	0	134	0	20	2	0	0	0	2	3	0	0	3	4	0	0	0	0	2	0	0	0	0	2	3	0	2	0	0	0	0	0	3	3	9	0	2	16	1	0	0	0	0	0	0	0	1
LNC1070	3	0	0	0	0	0	0	0	0	1	0	0	0	1	0	0	0	0	0	64	0	0	0	0	0	0	1	0	4	0	0	0	0	0	0	0	0	0	0	0	0	0	0	0	0	0	0	0	0
LNC1072	7	1	45	25	0	18	76	14	0	2	4	8	46	0	18	9	13	1	3	38	0	18	13	21	24	2	12	6	0	4	3	4	2	5	15	0	20	0	0	27	0	1	52	18	4	48	0	49	3
LNC1085	0	0	0	0	0	1	0	5	0	0	0	3	0	0	0	0	0	0	1	0	0	0	0	0	0	0	5	0	4	4	0	0	0	0	0	0	0	3	0	3	0	1	0	0	0	0	0	2	0
LNC1097	0	0	3	0	0	5	9	0	0	0	6	0	0	0	1	0	9	0	1	0	0	25	0	18	0	2	7	0	0	4	17	1	18	0	0	0	2	0	0	7	0	2	5	0	0	12	3	0	14
LNC1099	13	4	17	1	76	2	2	0	0	0	0	2	0	0	0	4	0	0	16	0	0	0	13	82	0	0	2	0	2	0	5	8	0	0	10	0	0	6	0	1	0	0	0	1	0	0	0	39	0
LNC1134	0	0	0	0	0	48	3	0	0	0	19	0	0	0	0	2	0	45	2	3	0	0	2	0	0	0	0	0	0	0	0	16	1	0	0	0	16	0	21	12	0	11	0	0	0	3	3	10	0
LNC1147	0	0	10	0	0	0	0	2	0	0	2	0	0	2	0	0	0	0	0	0	0	1	0	4	0	0	0	0	0	0	0	0	0	0	0	0	0	0	0	0	0	0	0	0	0	0	0	0	0
LNC1151	0	0	0	0	0	0	0	1	0	0	0	0	0	0	0	0	0	0	0	0	0	0	0	0	0	0	0	0	0	0	1	0	0	0	0	0	0	0	0	0	2	0	0	1	0	0	0	0	0
LNC1158	0	5	0	0	0	0	4	2	0	0	0	0	1	0	0	0	0	0	0	0	0	0	0	0	0	0	0	1	1	3	0	0	0	0	0	0	0	0	0	0	6	0	0	1	0	0	7	0	1
LNC1159	0	0	0	0	30	23	1	0	24	0	1	153	1	14	13	37	46	0	0	0	0	1	0	45	0	0	0	2	2	44	0	0	0	0	0	3	1	0	12	76	7	0	0	14	0	1	0	0	0
LNC1161	0	0	0	0	0	0	0	0	0	0	0	0	0	0	0	0	0	0	0	0	0	0	0	0	0	0	0	0	0	0	0	0	0	0	0	0	0	0	0	0	0	0	0	0	0	0	0	0	0
LNC1162	0	31	4	2	0	22	0	0	16	9	27	19	46	30	1	1	0	1	0	39	20	31	32	9	44	8	28	0	18	6	13	2	18	25	1	22	7	1	22	12	0	2	0	0	5	1	5	6	13
LNC1170	0	0	0	0	0	8	4	1	0	0	0	2	0	0	0	0	0	2	0	0	0	0	0	8	0	0	15	0	2	0	0	0	0	0	0	0	0	0	1	0	0	0	33	0	12	0	0	0	0
LNC1172	8	7	4	0	190	1	24	0	9	0	5	0	0	9	0	4	0	0	0	0	0	1	1	6	0	1	0	0	2	0	0	0	0	0	0	5	5	0	1	0	3	10	0	0	0	0	0	0	0
LNC1187	0	6	0	0	0	8	0	4	0	0	0	0	3	0	0	3	0	0	0	0	1	0	1	25	2	1	2	5	0	0	0	0	1	0	12	5	4	0	15	0	0	0	3	0	7	0	0	0	0
LNC1187	0	6	0	0	0	5	1	6	0	0	1	0	11	0	0	5	0	12	2	0	0	1	0	16	4	5	10	5	0	0	1	0	0	0	0	23	5	0	15	0	0	0	0	0	9	0	24	0	1
LNC1189	0	4	1	0	6	41	33	2	0	31	20	0	6	35	1	0	0	29	10	2	2	10	3	93	0	4	3	0	13	0	1	6	9	0	2	5	3	0	3	0	18	1	0	3	7	1	0	21	5
LNC1196	0	0	0	0	7	3	2	0	0	0	0	0	3	0	0	36	1	36	0	3	0	0	0	8	0	1	0	0	0	0	0	3	6	11	0	0	1	0	0	0	1	0	0	0	1	0	7	0	0
LNC1199	0	2	1	0	0	0	3	1	0	27	0	0	17	7	0	14	1	1	0	1	0	56	0	1	50	0	0	0	0	59	0	0	2	0	0	0	0	2	27	1	3	0	0	0	0	0	2	3	0
LNC1203	0	0	0	6	14	7	0	4	0	0	2	0	0	6	0	0	0	0	0	0	0	41	0	0	0	10	0	0	0	0	0	0	0	0	0	0	0	0	1	0	3	0	0	0	0	3	0	0	1
LNC1204	0	0	3	0	0	19	0	20	0	0	0	0	0	1	71	0	9	0	4	0	5	1	1	2	0	5	3	0	0	2	0	0	0	0	0	2	2	5	0	20	1	0	0	0	9	0	56	0	0
LNC1207	321985	142304	237985	99199	94159	56026	136304	130535	100334	121608	58129	340712	124681	228162	40729	28193	22964	42091	72825	43976	35689	30550	249423	153281	105877	178813	210202	165308	157527	468967	153978	219805	94418	166654	129373	142484	139181	233024	211290	235058	102576	199218	120075	181295	193124	194994	211906	257643	184032
LNC1220	0	36	3	0	2	9	0	0	0	24	0	0	2	4	1	29	0	0	0	1	0	0	0	0	1	7	18	25	1	0	0	2	7	6	76	3	0	2	1	187	19	16	14	8	0	0	0	0	1
LNC1222	6	47	44	315	40	73	122	67	1	51	32	1	6	82	159	201	30	325	63	0	48	169	73	318	19	73	44	121	52	218	100	140	22	139	73	50	58	81	120	23	76	44	9	16	94	83	19	55	86
LNC1231	0	3	1	5	0	48	13	0	0	19	17	0	6	2	37	2	1	5	96	19	0	0	20	3	0	0	51	3	9	5	24	1	153	4	26	4	108	0	146	5	11	3	49	0	21	18	20	10	14
LNC1250	107	26	27	107	69	43	4	12	52	113	20	0	164	12	25	55	0	11	2	106	0	42	0	210	2	1	2	0	0	196	125	6	99	26	75	49	22	2	4	4	6	15	73	0	4	217	13	154	101
LNC1256	0	0	0	0	1	2	0	0	1	2	3	0	0	0	0	0	0	0	0	0	0	8	0	0	0	5	0	0	0	0	0	1	0	0	0	0	0	0	0	0	0	0	0	7	0	0	0	0	0
LNC1266	0	0	0	0	4	13	1	0	0	0	4	0	0	0	0	0	0	0	0	8	0	0	3	2	0	1	0	0	0	1	0	0	7	0	0	0	0	0	0	0	0	1	0	0	1	0	0	0	0
LNC1267	0	0	0	2	0	4	0	1	0	2	0	0	0	0	0	0	0	0	0	0	0	0	0	0	0	0	0	0	0	0	0	0	0	0	0	0	0	0	0	0	0	0	0	0	4	0	0	0	0
LNC1272	12	9	0	0	117	1	3	11	1	2	18	10	159	26	1	48	1	4	19	0	7	155	18	2	2	13	4	0	27	0	7	21	32	26	0	16	16	34	12	4	0	10	9	0	0	0	63	32	5
LNC1273	0	0	0	0	0	4	0	0	1	0	0	0	0	15	0	1	29	0	0	0	0	0	0	0	0	0	0	0	0	0	0	0	0	0	3	0	0	0	7	2	0	0	0	0	0	0	0	0	0
LNC1276	0	0	0	0	0	0	0	0	0	0	0	0	0	0	0	0	0	0	0	0	0	0	0	0	0	0	0	0	0	0	0	0	0	0	0	0	0	0	0	0	0	0	0	0	0	0	0	0	0
LNC1286	0	21	23	0	114	45	127	41	35	0	115	58	0	1	9	18	1	0	0	17	1	0	81	7	37	5	1	0	21	5	34	0	0	0	0	39	5	12	12	17	12	14	0	25	21	12	0	0	4
LNC1292	0	0	0	0	0	0	0	0	0	0	0	0	0	0	0	0	0	0	0	0	0	0	0	0	0	0	0	0	0	0	0	0	0	2	0	0	0	0	0	0	0	0	0	0	0	0	0	0	0
LNC1293	0	0	0	2	93	1	14	0	0	58	29	2	75	4	0	7	88	0	5	8	0	5	53	59	0	4	0	0	65	0	71	0	43	12	28	59	21	0	155	0	36	40	0	0	157	0	18	0	107
LNC1298	0	8	6	0	21	5	6	37	0	0	5	0	19	0	0	5	0	0	0	12	23	0	19	9	15	4	1	9	1	1	5	19	11	1	5	2	13	5	31	11	14	19	0	9	1	0	35	1	2
LNC1307	2	0	0	0	0	0	1	0	0	0	0	0	0	0	0	0	0	0	0	0	0	0	0	0	8	0	0	0	0	0	0	0	0	0	0	0	0	0	0	0	0	0	0	2	0	0	0	0	0
LNC1308	0	0	7	0	0	6	5	0	45	1	0	0	0	1	0	3	2	0	0	0	0	0	0	0	0	0	0	0	2	0	0	14	0	0	0	2	1	8	0	0	0	0	0	1	0	3	0	0	0
LNC1314	2	0	3	0	0	1	0	1	0	0	0	0	7	0	0	1	0	0	0	0	0	0	0	3	0	0	0	0	0	0	0	0	0	1	0	0	0	2	0	0	0	0	0	0	0	0	0	2	0
LNC1317	29	7	11	21	6	21	56	30	20	82	31	0	0	36	7	41	0	6	30	8	4	1	7	192	12	21	27	96	8	57	7	57	8	11	13	83	23	12	6	16	15	4	0	14	15	35	22	8	13
LNC1318	0	0	0	0	0	0	0	0	0	0	0	0	0	0	0	0	0	0	0	0	0	0	0	0	0	0	0	0	0	0	0	0	0	0	0	0	2	0	0	0	0	0	0	0	0	0	0	0	0
LNC1320	0	0	0	0	1	5	8	3	0	0	9	0	0	0	0	0	1	0	1	0	0	0	5	0	0	0	5	0	0	1	13	0	8	4	0	0	3	0	0	1	0	0	0	1	0	2	0	0	0
LNC1330	0	5	4	7	0	17	7	45	11	2	16	0	50	0	5	38	53	0	5	1	0	0	0	11	0	11	5	6	17	88	0	25	0	0	4	30	18	5	70	55	2	2	0	40	1	0	3	11	3
LNC1348	163	214	105	302	278	138	251	195	83	348	293	125	82	114	122	226	78	26	87	80	14	164	57	314	3	53	184	6	90	74	64	15	83	135	119	227	62	92	163	39	24	88	86	110	46	40	363	38	92
LNC1357	0	0	1	0	0	0	0	11	0	0	0	0	0	0	1	0	0	0	0	0	0	0	0	0	0	0	0	0	0	0	0	0	0	0	0	0	0	0	0	1	0	0	1	0	0	0	0	0	0
LNC1363	0	1	0	0	0	0	0	0	0	0	0	0	0	0	4	5	0	0	0	0	1	0	2	0	0	0	0	0	0	1	0	2	2	0	0	0	2	0	3	19	0	0	0	6	0	0	0	0	0
LNC1366	0	60	10	1	0	541	467	0	2	0	482	5	0	284	149	156	72	0	25	128	483	452	174	538	13	78	313	0	0	0	305	504	724	208	425	99	115	296	184	58	0	284	0	2	0	2298	297	46	343
LNC1380	0	4	1	0	9	2	0	0	0	0	0	0	0	1	0	4	3	0	0	0	0	0	25	0	0	4	0	3	7	0	0	0	6	0	0	0	1	11	0	5	0	0	185	0	0	0	1	0	1
LNC1384	0	0	11	0	0	0	0	1	0	0	0	0	0	0	0	0	4	0	0	0	0	0	2	0	0	0	0	0	0	0	0	0	0	0	0	0	3	0	0	0	0	0	36	0	0	0	0	0	0
LNC1387	0	0	0	0	0	0	0	2	1	0	0	0	0	0	0	0	0	0	0	0	0	0	0	0	1	0	0	0	0	0	0	0	0	0	0	0	0	0	0	0	0	0	0	0	0	0	0	0	0
LNC1392	0	0	42	0	0	0	0	15	1	1	0	1	1	0	0	15	117	0	21	0	0	0	0	1	0	0	7	17	9	0	5	0	0	1	0	5	1	24	1	10	0	0	56	0	2	0	0	0	3
LNC1401	273	135	73	378	116	246	165	57	130	17	75	11	87	35	47	341	118	24	94	249	68	88	181	517	8	56	284	179	53	110	216	294	198	147	243	86	138	68	140	99	62	180	39	16	145	183	70	143	102
LNC1402	0	6	0	0	0	0	1	0	0	0	4	0	0	0	60	2	0	0	1	0	0	0	0	1	0	1	0	0	0	0	22	0	0	0	0	0	3	0	0	4	0	1	0	0	1	0	0	0	2
LNC1418	0	0	0	0	0	0	2	0	0	2	3	0	1	1	0	1	0	0	0	0	0	0	123	3	0	0	0	0	0	4	0	0	0	0	0	0	14	0	0	0	2	0	0	0	0	0	3	0	2
LNC1421	0	2	29	47	53	28	20	10	11	6	7	0	21	15	1	116	18	0	0	34	16	21	11	157	2	8	6	0	17	18	9	90	22	14	0	23	56	39	1	27	0	3	86	1	17	50	0	27	68
LNC1426	0	0	0	2	0	1	0	2	0	0	23	1	0	1	0	1	2	13	0	0	0	2	0	46	0	2	1	0	2	4	3	3	0	0	1	0	1	13	6	3	1	15	0	48	0	29	0	0	1
LNC1431	0	0	0	0	0	0	38	0	0	0	0	0	0	0	0	0	2	0	0	0	0	0	0	0	0	0	0	0	0	0	0	0	0	0	0	0	2	0	0	0	0	0	0	0	0	0	0	0	0
LNC1436	0	0	0	0	0	0	0	0	0	0	0	0	0	0	0	1	0	0	0	0	0	0	0	0	0	0	0	0	0	0	0	0	0	0	0	0	0	0	1	0	0	0	0	0	0	0	0	0	0
LNC1443	28	54	72	5	34	43	58	49	7	29	1	23	29	7	4	48	42	0	13	26	0	111	133	0	0	14	39	26	112	3	9	2	54	67	3	12	71	18	47	47	65	44	1	41	22	22	28	33	10
LNC1451	0	0	0	0	0	0	0	0	0	0	0	0	2	0	1	0	0	0	43	0	0	0	1	0	0	0	1	0	3	2	12	0	0	1	0	7	0	20	0	0	17	0	0	0	0	0	0	91	0
LNC1460	0	5	0	3	2	0	1	0	0	0	24	0	0	1	0	3	51	0	4	0	0	0	0	0	0	0	2	0	1	0	0	1	0	0	1	16	12	0	33	0	0	0	0	0	10	0	0	0	0
LNC1474	0	0	3	0	1	0	0	0	1	0	0	9	0	0	0	0	10	0	0	5	0	0	0	0	0	1	0	13	0	0	18	0	0	0	0	0	24	0	2	3	1	0	0	0	0	0	0	0	1
LNC1490	1	1	0	0	0	0	0	0	2	0	8	0	0	0	0	0	16	0	14	18	0	0	2	0	0	2	1	2	0	5	2	0	0	0	44	2	0	0	2	0	9	0	2	9	0	19	1	0	0
LNC1500	99	24	0	0	6	37	2	12	43	0	13	371	3	4	2	25	51	39	2	2	4	0	125	13	0	29	10	19	23	55	13	2	0	6	2	11	2	3	74	51	2	9	2	1	6	2	0	7	12
LNC1515	0	0	0	0	0	0	0	0	0	0	0	0	0	0	0	0	0	0	0	0	0	0	0	0	0	0	0	0	0	0	0	0	0	0	0	0	0	0	0	0	0	0	0	0	0	0	0	0	0
LNC1518	0	0	0	0	0	0	0	0	0	0	0	0	0	0	0	0	0	0	0	0	0	0	0	1	0	0	0	1	0	0	0	0	0	0	0	0	0	0	0	0	0	0	0	0	0	0	0	0	0
LNC1520	0	0	0	0	14	0	0	2	0	0	0	0	0	0	0	0	0	0	0	0	0	0	0	0	0	0	0	0	0	0	0	0	1	0	0	0	0	0	0	3	0	0	329	0	0	0	0	0	0
LNC1523	11	0	0	0	0	3	0	0	0	0	0	0	0	0	0	0	0	0	0	0	0	0	0	0	0	0	0	0	0	0	0	1	0	0	0	0	0	0	0	0	0	0	3	0	0	0	0	0	0
LNC1526	11	0	0	0	0	0	0	1	0	0	0	36	0	0	8	0	2	0	0	0	0	0	0	0	0	0	0	0	0	0	0	0	0	0	0	0	0	0	0	0	0	3	0	0	0	2	0	0	0
LNC1532	2	1	2	0	0	3	0	4	0	2	1	3	0	3	0	10	0	0	2	0	0	12	0	8	2	0	4	1	0	0	0	4	0	0	0	0	2	0	0	10	0	0	0	0	3	0	0	0	13
LNC1535	0	0	32	69	14	46	13	33	20	9	25	0	1	0	10	52	0	9	6	1	0	0	8	15	15	8	1	26	17	0	0	0	16	4	1	59	63	0	3	33	1	1	0	2	3	12	0	0	13
LNC1540	0	1	3	85	1	16	0	3	0	0	64	0	156	9	0	20	0	0	16	17	2	7	54	33	4	20	1	94	4	19	25	21	0	0	67	1	0	0	6	1	139	6	14	91	1	30	34	260	2
LNC1545	0	0	0	0	0	1	0	0	0	0	0	1	0	0	1	2	0	0	0	0	0	0	0	0	0	0	0	0	0	0	0	0	0	0	0	0	0	0	0	0	3	0	0	0	0	0	0	0	0
LNC1552	0	0	0	20	0	0	0	5	0	0	0	4	0	0	0	4	0	5	0	0	0	0	15	12	22	0	0	0	0	6	0	0	0	0	0	0	3	0	1	0	0	0	0	0	0	0	0	0	4
LNC1554	0	0	0	0	0	0	0	0	0	0	0	0	0	0	0	0	0	0	0	0	0	0	0	0	0	0	0	0	0	0	0	0	0	0	0	0	0	0	0	0	0	0	0	0	0	0	0	0	0
LNC1555	29	45	5	59	5	203	39	10	21	6	96	20	15	15	55	35	12	25	15	48	18	9	65	95	0	31	17	130	4	82	70	9	9	28	7	3	2	27	93	38	42	18	12	13	25	26	1	12	46
LNC1561	0	0	0	0	0	2	0	0	0	0	0	0	0	0	4	0	0	0	0	0	2	0	0	0	0	6	0	0	0	0	0	0	0	0	1	0	0	0	0	0	0	0	0	9	0	0	0	0	0
LNC1563	0	3	9	0	0	0	0	0	5	0	3	0	0	0	0	0	9	0	0	3	0	1	0	0	0	0	0	0	0	1	3	0	0	0	2	9	0	0	1	0	0	0	0	0	0	8	0	9	0
LNC1567	0	0	6	7	0	2	120	0	44	22	28	0	0	1	94	54	97	0	7	0	0	0	0	16	1	16	23	0	0	0	8	0	0	5	0	57	5	6	8	0	0	0	0	0	0	6	2	1	11
LNC1572	0	0	0	0	0	9	0	0	0	0	0	3	0	0	0	0	0	0	0	0	0	0	2	0	0	0	1	0	0	0	0	0	0	0	0	0	0	0	2	0	0	0	0	0	1	0	0	0	0
LNC1572	7	38	184	302	8	158	150	70	2	4	89	77	404	35	257	20	88	6	15	0	96	0	86	1	1	162	71	65	1	0	1	0	21	1	5	35	4	6	215	69	192	419	0	183	30	41	415	45	0
LNC1577	0	0	0	0	0	16	0	1	1	0	0	0	0	5	0	2	0	0	0	0	0	0	0	0	0	0	1	3	0	0	0	0	0	0	0	0	0	0	0	0	0	0	0	0	0	0	0	0	0
LNC1579	88	3	6	0	1	3	3	17	18	21	15	1	3	0	17	9	15	1	9	3	2	0	4	14	6	8	0	2	2	11	12	0	6	1	0	3	2	17	46	0	111	2	0	2	4	3	83	49	0
LNC1582	0	0	0	0	0	12	1	4	20	0	2	0	0	0	0	1	0	0	0	0	0	1	0	0	0	0	4	0	0	0	0	0	2	2	0	0	0	15	0	0	0	0	0	0	0	0	0	0	0
LNC1584	0	0	0	0	0	2	0	0	0	0	0	0	0	0	0	0	0	0	0	0	0	0	1	0	0	0	0	0	0	0	0	0	0	0	0	0	0	0	0	0	0	0	29	0	0	0	0	0	0
LNC1590	0	0	0	0	0	0	0	0	0	0	0	0	0	0	0	0	0	0	0	0	0	0	0	0	0	0	0	0	0	2	0	0	0	0	0	0	3	0	0	0	0	0	0	0	0	4	0	0	2
LNC1591	0	0	0	439	1	36	0	0	0	0	0	0	0	0	7	48	0	0	0	0	0	2	0	3	0	0	0	0	0	0	0	0	0	0	0	0	0	0	2	0	46	3	0	0	0	7	0	0	0
LNC1598	0	0	0	15	0	0	0	7	0	0	3	0	0	0	0	0	0	0	0	0	4	0	0	0	0	0	0	0	0	2	1	0	0	0	0	0	0	0	0	0	0	0	0	0	0	0	0	0	0
LNC1606	0	0	0	0	0	1	0	0	0	0	0	0	0	0	0	0	0	0	2	0	0	0	0	7	0	0	0	0	0	0	0	0	0	0	0	0	0	0	0	0	0	1	0	0	0	0	0	2	0
LNC1609	0	16	0	5	2	46	59	3	42	1	23	0	3	3	0	0	0	0	3	0	0	0	0	9	0	0	62	0	1	0	0	0	0	3	1	1	2	1	4	0	0	0	0	0	0	10	17	3	0
LNC1612	0	0	0	0	0	20	0	5	0	0	0	0	0	0	0	0	0	23	0	0	0	0	1	0	0	0	0	0	0	0	0	0	0	0	0	0	0	0	0	0	0	7	0	0	0	0	0	0	0
LNC1613	199	9	2	1	0	17	0	0	11	1	1	18	66	26	51	2	41	1	0	99	10	0	162	15	0	0	0	0	3	20	1	0	16	1	9	41	0	0	0	0	8	0	0	3	0	18	0	1	3
LNC1621	1	0	0	0	1	6	0	0	0	15	0	0	0	0	0	0	0	0	0	2	0	0	0	0	0	0	0	0	0	0	0	0	0	0	0	0	0	0	15	0	0	0	0	4	0	1	0	0	0
LNC1638	22	0	0	0	0	0	0	0	0	0	0	0	7	0	0	0	0	0	0	0	0	0	0	0	0	0	0	0	2	0	0	0	1	0	0	0	0	0	0	0	0	0	0	0	0	5	0	0	0
LNC1660	0	6	0	0	0	8	0	1	0	0	0	0	0	0	0	0	0	0	0	0	0	0	0	0	0	0	0	0	0	0	0	0	0	0	0	1	0	0	1	0	0	0	0	0	0	0	0	0	0
LNC1663	0	7	0	19	0	14	9	1	0	0	0	0	0	0	2	2	1	0	0	1	0	0	0	5	0	0	1	1	0	0	9	0	0	0	1	1	0	1	0	0	0	0	0	0	0	0	0	0	0
LNC1667	0	0	20	0	0	5	0	0	4	0	0	0	0	0	1	0	1	0	0	0	0	0	3	0	0	0	0	0	2	15	0	0	0	1	0	0	2	0	0	2	0	0	0	8	0	0	0	0	22
LNC1672	11	44	27	2	7	46	40	84	15	0	1	127	6	25	7	36	1	0	71	23	0	19	0	9	24	50	14	11	19	29	10	7	29	72	13	42	29	46	28	4	1	22	0	7	1	25	38	2	10
LNC1676	0	2	93	132	31	1182	90	10	77	5	310	0	139	49	34	233	108	44	0	363	13	35	1	169	19	50	38	12	9	0	74	56	31	430	2	31	25	6	149	1	133	87	0	40	178	242	156	136	55
LNC1686	0	0	2	0	65	33	1	13	0	0	4	0	1	0	2	14	0	2	0	0	0	0	0	2	0	1	0	0	1	0	0	0	0	0	0	1	0	5	1	18	0	0	0	0	3	6	0	0	0
LNC1688	1	2	7	16	22	19	18	6	6	26	9	0	11	6	11	1168	11	0	8	6	3	6	2	4	5	4	4	7	3	2	0	3	3	2	10	5	7	1	4	3	2	8	2	7	2	1	7	0	1
LNC1704	1	0	0	0	0	12	1	1	0	0	9	2	0	0	0	0	0	0	0	0	0	0	0	0	0	2	0	0	0	0	0	0	0	0	0	0	33	34	0	0	0	6	0	0	0	3	0	0	0
LNC1706	110	5	28	44	11	118	21	218	16	26	54	25	40	19	11	106	6	25	0	1	26	2	28	251	28	38	21	8	8	70	4	0	1	69	17	6	3	8	117	53	66	53	4	13	14	9	26	5	11
LNC1707	0	0	0	0	0	0	0	0	0	0	0	0	0	0	0	0	0	0	0	0	0	0	0	0	1	0	0	0	0	0	0	0	0	0	0	0	0	0	1	0	0	0	0	0	0	0	0	0	0
LNC1721	67	20	22	69	35	83	83	11	244	80	89	76	13	12	29	69	185	9	18	54	7	26	39	50	53	14	30	18	79	43	12	44	29	12	66	13	22	49	113	140	11	28	38	171	6	145	51	34	1
LNC1728	0	0	4	0	0	3	20	0	0	2	5	0	0	0	0	0	0	0	0	0	0	8	1	0	0	0	1	0	15	9	0	0	0	0	0	0	2	0	0	2	0	0	0	0	1	0	0	0	7
LNC1729	0	1	4	5	2	13	60	0	8	28	45	0	0	10	0	0	0	5	1	2	1	2	3	0	1	1	16	0	1	20	0	3	3	5	0	1	1	0	2	0	3	0	5	0	0	1	1	0	12
LNC1762	79	6	56	164	96	168	65	29	458	14	39	20	100	51	133	252	344	39	5	118	29	70	75	45	82	16	12	8	98	110	12	41	22	86	176	57	88	106	103	227	31	116	45	131	9	135	172	100	29
LNC1771	0	0	1	74	2	17	0	0	0	0	1	4	3	8	1	0	3	8	1	6	6	1	0	0	0	0	6	1	1	9	12	0	0	3	17	21	1	4	1	4	0	1	0	9	0	1	0	1	1
LNC1785	0	7	17	79	54	44	3	9	57	0	2	14	60	26	8	44	0	0	1	1	0	0	3	12	1	38	4	0	24	67	6	47	0	74	3	1	17	1	51	13	7	20	0	19	0	2	20	0	14
LNC1824	0	2	0	0	0	0	0	0	0	0	0	0	4	0	0	0	0	0	0	0	4	0	21	5	0	0	0	0	0	0	0	0	0	0	22	0	0	0	0	4	1	0	0	0	12	0	0	7	0
LNC1825	2	1	96	21	0	16	10	13	0	0	1	2	0	21	11	22	12	3	0	3	25	0	0	9	49	22	0	0	0	0	0	11	0	6	11	11	30	0	29	2	6	0	0	1	1	0	31	0	3
LNC1848	4	0	1	0	0	27	0	2	114	41	20	0	1	13	0	11	126	0	0	121	4	48	1	56	0	3	1	1	0	0	1	0	21	8	0	0	3	3	22	0	0	0	66	9	0	0	0	0	7
LNC1873	0	3	0	37	5	12	0	45	1	11	0	0	8	0	0	9	0	0	0	0	0	0	0	1	1	0	8	7	1	0	0	0	0	0	0	1	1	8	2	9	1	0	0	0	0	13	0	0	2
LNC1876	0	0	0	0	0	15	0	0	0	0	0	0	7	0	0	0	0	0	0	0	0	0	0	0	0	5	0	5	0	0	0	1	0	1	0	0	0	0	0	38	0	0	0	8	0	0	0	0	0
LNC1877	0	0	3	1	0	3	1	0	7	0	0	0	0	0	0	3	0	0	24	0	0	0	1	4	0	0	62	7	0	5	12	0	0	8	17	1	9	0	10	3	9	0	1	0	1	17	0	8	9
LNC1894	91	16	23	52	11	45	35	26	10	7	19	9	21	10	0	44	22	0	1	35	24	38	27	18	12	5	20	44	28	44	21	14	30	12	54	75	66	102	140	90	9	44	289	50	31	54	19	25	17
LNC1902	107	62	32	1	69	463	48	2	195	106	68	162	96	117	4	0	171	0	456	0	24	0	5	106	12	25	16	0	100	184	6	0	0	0	197	197	1184	451	84	2	57	155	0	0	161	0	32	0	29
LNC1909	0	1	0	0	0	0	0	9	0	0	0	0	0	0	0	0	0	0	0	0	0	0	0	0	0	0	0	0	0	0	0	0	0	0	0	1	0	0	0	0	0	0	0	0	1	0	0	0	0
LNC1923	0	11	0	0	0	7	0	77	8	1	11	0	39	0	2	9	5	0	0	1	0	0	0	2	0	0	0	0	1	1	10	0	1	2	2	0	10	2	0	10	0	8	0	2	2	1	2	0	26
LNC1935	123	227	66	96	252	377	277	373	148	18	178	175	117	39	513	587	266	8	378	76	94	54	12	214	21	153	327	30	155	476	187	126	66	54	363	625	286	249	1294	488	44	594	317	1722	351	123	308	44	136
LNC1962	6	0	0	0	0	8	22	0	0	1	0	0	0	0	1	0	0	0	0	0	0	0	0	4	0	0	0	0	0	0	0	4	0	0	0	0	1	0	0	0	5	0	0	0	2	0	0	1	0
LNC1964	295146	255392	226561	65805	48844	29929	67962	74190	59543	64863	38997	359457	64418	139526	22522	16662	12449	23480	71900	23242	24035	16547	188446	101387	101549	168060	192983	185933	177490	449203	154595	205626	110924	214076	125058	125022	120528	258821	202429	243499	136414	193282	151018	209110	176058	209053	200661	244979	214723
LNC1965	10	16	41	5	11	41	1	11	81	6	1	19	16	11	5	7	11	21	19	15	0	15	17	35	4	12	5	42	18	5	0	1	8	12	11	3	22	25	11	7	17	7	39	9	9	58	12	9	4
LNC1967	0	0	0	0	0	0	0	0	0	0	0	0	0	0	0	0	0	0	0	0	0	0	0	0	0	0	0	1	0	0	0	0	1	0	3	0	0	0	0	0	0	0	0	0	0	0	0	0	0
LNC1980	7	0	27	0	7	6	0	10	11	0	0	24	8	3	0	10	37	0	6	9	0	0	0	15	0	3	0	0	0	14	0	0	2	0	0	2	2	1	0	2	0	0	28	0	0	0	0	0	0
LNC1992	0	1	34	10	0	1	0	0	0	0	1	0	10	0	8	0	0	0	0	0	0	0	0	0	0	1	4	9	0	0	0	0	4	0	0	0	3	32	0	0	0	0	2	0	66	0	0	0	12
LNC2018	0	0	0	0	0	0	0	0	0	0	0	0	0	0	0	0	0	0	0	0	0	0	0	0	0	0	0	0	0	0	0	0	0	0	0	0	0	0	0	0	0	0	0	0	0	0	0	0	0
LNC2028	28	0	67	25	0	16	2	10	95	0	41	2	11	6	7	94	6	2	0	29	2	0	4	1	1	6	1	0	6	0	7	7	2	8	37	5	81	2	100	45	3	8	9	6	0	27	0	7	22
LNC2036	0	4	5	0	5	29	0	9	2	0	1	0	1	0	3	3	5	6	0	1	0	1	0	1	0	6	0	1	5	2	0	0	4	0	13	10	47	0	27	0	1	9	0	0	0	0	5	2	19
LNC2037	0	0	0	0	0	3	0	0	0	0	3	0	0	0	0	0	0	0	0	0	0	0	0	0	0	0	0	0	0	0	0	0	0	0	0	0	0	0	0	0	0	0	0	0	0	0	0	0	0
LNC2038	2	0	1	2	0	43	0	2	0	0	11	1	3	0	9	0	0	0	0	0	0	0	0	0	0	0	0	0	0	13	0	0	0	0	0	0	0	0	0	0	0	0	0	0	6	0	0	0	0
LNC2051	3	0	1	0	2	0	0	0	0	0	0	2	1	0	0	0	0	0	5	0	0	0	1	0	0	0	0	0	0	7	0	0	0	0	0	0	0	1	19	0	0	0	0	0	0	0	0	0	2
LNC2059	0	0	4	0	0	5	0	2	4	9	0	0	0	14	0	0	0	0	0	0	1	0	0	0	0	0	0	0	0	0	0	0	0	0	0	0	0	0	0	3	0	0	0	0	0	0	3	0	0
LNC2065	0	0	0	0	0	15	0	9	0	0	0	0	0	0	0	16	0	0	0	0	0	0	0	0	4	0	0	0	8	0	0	0	0	0	0	0	17	0	6	0	0	0	0	0	0	0	0	0	0
LNC2066	0	2	0	7	5	3	1	5	0	0	7	9	2	9	0	22	5	0	13	0	1	0	26	25	0	4	0	2	12	11	25	0	0	0	21	3	11	3	12	2	1	7	0	0	3	8	0	2	0
LNC2080	934	1097	2000	2286	2416	4504	2618	4350	2931	2686	2095	2091	2861	2233	2089	2125	4670	1384	1205	2348	2018	1525	2979	3580	780	1258	1180	1584	1378	1717	1404	1505	1828	1525	1822	1506	1535	1259	2869	1852	1172	1232	1122	949	1046	2016	1341	1144	2214
LNC2095	0	10	0	0	0	0	0	5	0	0	5	0	0	0	0	0	2	0	0	0	0	0	0	1	2	0	0	13	0	1	0	0	0	1	0	0	9	0	0	28	4	0	0	0	0	0	0	0	1
LNC2100	3	0	5	0	7	99	14	308	64	123	8	11	38	11	18	143	20	0	0	16	10	109	34	8	11	9	0	24	6	9	4	0	1	134	6	27	8	20	1	104	48	27	22	5	1	0	4	0	10
LNC2109	2	0	0	26	42	7	0	3	0	10	0	4	0	0	10	5	3	0	3	5	0	0	0	10	0	5	0	1	6	9	1	1	0	1	17	0	2	0	1	0	1	0	0	1	4	26	0	0	2
LNC2118	362	71	19	302	140	291	17	49	178	25	154	222	256	103	182	160	24	14	37	118	44	242	53	509	6	68	40	90	22	157	21	70	9	112	19	9	83	97	174	2	140	16	82	79	5	83	171	4	139
LNC2121	913	158	227	237	686	419	429	597	309	126	282	177	341	199	494	796	457	126	219	417	206	131	304	718	118	261	382	602	225	575	442	219	421	160	382	408	642	894	409	214	185	625	92	595	279	355	864	97	271
LNC2135	0	0	21	0	42	3	40	7	0	11	4	19	1	32	0	1	110	0	3	5	0	0	0	0	0	0	0	3	6	2	6	1	0	0	20	27	10	3	4	0	0	4	24	1	0	0	37	0	0
LNC2136	197	273	290	54	161	207	200	121	324	164	65	0	191	118	142	464	508	10	542	99	45	22	33	160	129	223	268	196	403	224	534	282	167	136	172	965	547	918	1769	1265	127	755	498	1414	775	253	507	71	88
LNC2146	0	0	0	0	0	2	3	0	0	0	0	0	0	0	1	0	0	0	0	0	0	0	0	0	0	0	0	0	0	0	0	0	0	0	0	0	0	0	1	0	0	0	0	0	0	0	0	0	0
LNC2160	2	16	0	0	17	74	2	0	0	0	16	0	17	0	0	0	0	0	3	0	0	0	14	0	269	0	20	0	0	0	0	1	0	0	0	0	22	0	52	0	0	0	0	0	0	0	0	0	0
LNC2172	0	1	22	0	33	87	43	32	440	0	15	10	0	137	45	35	7	0	1	8	44	0	2	34	0	84	3	13	3	37	0	3	0	7	0	8	36	32	53	78	2	16	9	8	48	0	0	8	58
LNC2182	2	3	0	0	8	51	48	0	0	1	9	0	5	47	11	54	10	134	24	25	42	3	111	141	0	40	0	9	10	43	20	9	11	83	0	11	17	62	7	6	9	29	17	3	8	9	57	40	41
LNC2189	3	10	0	0	6	38	1	8	0	0	14	17	2	7	1	0	0	13	1	2	0	1	0	9	0	0	2	5	3	5	2	6	27	0	3	7	1	4	10	4	20	0	4	6	1	0	0	22	14
LNC2200	66	5	0	31	18	18	0	2	4	1	0	37	0	6	4	0	12	0	0	4	0	1	0	0	1	0	16	42	0	0	2	0	0	5	0	0	4	0	2	1	0	25	0	5	0	0	3	0	2
LNC2205	0	0	0	0	0	30	0	2	0	0	9	2	0	0	0	0	0	0	2	0	0	0	0	0	0	0	0	18	0	0	0	0	0	0	0	0	0	14	14	0	0	3	0	0	3	0	0	0	3
LNC2208	0	0	0	0	0	7	10	1	0	2	7	2	1	0	0	2	0	0	24	0	0	0	0	8	0	0	0	7	0	10	0	0	0	0	0	13	5	0	29	0	3	0	0	0	3	0	0	0	1
LNC2215	5	4	11	1	5	2	1	3	6	1	2	0	3	5	5	3	3	6	3	2	4	0	6	4	3	3	6	3	7	16	4	2	3	1	4	11	9	1	5	21	6	11	21	9	1	17	5	3	6
LNC2229	0	5	0	0	0	0	138	0	5	0	2	0	0	0	0	0	0	0	0	0	8	0	0	0	0	0	0	1	0	0	0	0	0	0	0	0	1	0	0	0	0	0	0	0	12	0	0	0	0
LNC2235	0	0	0	0	0	0	0	0	0	1	0	0	0	0	0	0	0	0	0	0	0	0	0	0	0	0	0	0	0	0	0	0	0	0	0	0	0	0	0	0	0	0	0	0	1	0	0	0	0
LNC2236	1	29	6	15	0	7	7	0	38	79	12	2	0	1	1	22	118	0	26	28	21	17	25	28	0	0	25	2	1	14	29	1	0	52	8	69	23	39	14	14	35	13	124	0	3	8	0	0	64
LNC2244	0	0	0	0	9	23	0	0	0	0	0	4	0	2	0	3	0	0	0	0	0	0	0	0	0	1	11	3	1	0	16	0	0	29	0	10	4	0	0	0	0	2	4	0	1	4	0	16	0
LNC2252	76	0	0	5	0	3	0	1	0	0	0	0	19	3	0	0	0	0	0	0	0	0	0	0	0	0	3	1	0	0	0	0	0	16	0	0	0	0	0	0	0	0	7	0	0	0	0	12	0
LNC2254	1	38	60	50	4	140	24	24	35	139	108	37	33	34	17	10	8	59	41	3	59	0	10	132	0	4	61	20	3	81	7	1	7	29	0	23	6	6	11	14	7	3	19	0	5	13	9	29	5
LNC2265	0	0	0	1	0	0	0	0	0	0	0	0	0	0	0	0	0	0	0	0	0	0	0	0	0	0	0	0	0	0	0	0	0	0	0	1	0	1	0	0	0	0	0	0	0	0	0	0	0
LNC2268	0	1	11	0	4	19	8	29	0	0	0	52	2	10	5	0	0	0	6	0	0	0	2	0	0	3	5	0	7	0	10	0	0	0	12	0	3	0	0	0	1	0	31	3	0	17	6	0	0
LNC2270	20	1	12	0	0	0	10	1	1	0	3	0	0	3	0	0	1	0	0	0	0	0	0	0	10	0	0	49	2	0	1	0	22	0	0	0	0	10	5	0	0	5	6	15	8	4	0	2	41
LNC2277	0	0	0	1	0	1	0	10	0	0	2	1	0	0	0	0	0	0	0	0	1	1	0	0	1	0	0	9	3	7	0	0	0	0	1	3	0	0	33	11	0	2	0	0	0	0	0	0	0
LNC2318	0	33	0	0	23	2	25	21	1	12	7	1	0	6	17	8	0	2	1	5	0	0	0	3	13	24	1	11	20	17	2	7	1	8	1	19	6	13	2	2	0	0	5	0	8	0	0	4	31
LNC2331	0	44	24	1	49	60	52	0	0	5	21	0	3	1	35	15	14	0	0	0	0	16	0	0	0	7	3	0	2	0	3	4	2	2	4	71	16	15	48	3	1	11	0	11	2	1	26	1	0
LNC2335	0	0	0	2	0	4	0	0	0	0	0	15	10	5	0	0	4	1	0	0	0	1	2	4	0	0	0	1	0	6	1	0	10	0	3	6	0	0	0	4	3	1	0	0	0	0	0	7	2
LNC2343	15	12	3	0	0	12	0	43	20	0	0	36	3	40	1	6	14	1	0	35	1	0	95	59	0	6	83	0	14	66	4	11	8	5	13	53	72	0	4	92	11	7	18	11	0	18	28	5	3
LNC2350	3	0	2	1	3	5	1	6	8	1	1	1	2	2	2	1	1	1	0	2	0	1	1	3	2	0	4	3	1	1	1	1	2	0	3	2	2	1	3	2	0	1	2	5	1	0	3	1	1
LNC2356	23	36	9	0	18	30	40	85	3	9	8	11	6	8	2	17	63	1	16	2	1	2	17	51	72	40	61	61	40	163	31	0	0	61	55	81	84	50	513	58	15	43	63	216	4	25	14	13	30
LNC2364	0	16	31	17	8	8	74	7	0	0	0	12	0	3	0	11	299	0	0	4	0	0	5	0	0	1	0	0	1	0	34	0	0	4	16	29	10	0	8	31	1	0	22	81	18	33	1	2	11
LNC2380	0	40	24	27	242	57	317	1311	347	93	112	187	100	175	71	78	42	89	0	192	195	47	1	78	0	168	75	86	222	280	0	120	246	130	47	2	568	0	64	1090	1	14	0	147	214	21	250	177	34
LNC2383	0	0	1	3	0	0	0	0	0	0	0	0	0	0	0	0	14	0	0	4	0	0	0	0	0	0	0	0	0	0	0	0	0	0	0	0	0	0	1	0	1	0	0	64	0	0	0	0	0
LNC2393	0	26	0	3	1	15	15	12	2	0	19	3	0	9	0	9	32	2	0	9	0	0	1	3	0	8	19	22	10	29	5	0	2	5	4	26	5	5	2	14	9	3	6	7	12	7	18	1	2
LNC2400	0	34	0	5	0	25	140	0	0	0	0	0	0	0	12	10	0	0	0	0	0	60	0	0	0	3	0	0	0	0	5	0	0	4	7	11	0	0	33	10	0	0	0	0	0	59	0	0	0
LNC2401	5	0	0	0	75	15	99	0	0	0	0	0	97	20	0	6	1	0	132	0	4	0	3	0	0	2	105	1	342	0	39	173	37	17	2	205	306	2	127	0	0	18	58	1	225	11	90	0	43
LNC2410	1	4	2	0	1	148	0	8	0	0	0	0	67	0	24	21	4	0	0	0	0	3	0	1	31	14	0	19	10	35	0	0	51	1	0	1	1	0	3	0	3	0	6	2	0	0	23	2	0
LNC2436	20	61	87	27	19	81	20	73	32	4	33	0	89	67	40	64	30	30	106	64	24	34	41	54	0	27	32	12	41	70	15	22	30	5	9	24	81	25	17	34	26	40	8	45	48	73	60	22	3
LNC2446	1	73	8	0	72	42	161	11	0	22	20	5	13	6	11	135	5	33	1	0	6	21	33	45	0	4	8	2	15	308	66	15	11	0	1	38	10	10	1	15	0	1	88	1	9	0	67	46	27
LNC2460	0	13	0	20	31	3	14	22	3	33	3	14	25	9	4	15	35	0	11	2	19	1	2	102	8	9	21	0	24	38	2	6	4	3	52	47	9	10	102	49	4	4	1	10	0	73	1	3	0
LNC2461	109	0	0	0	3	33	4	0	7	0	0	4	53	4	25	0	75	2	2	0	0	0	3	0	0	6	0	0	0	5	0	1	0	10	2	42	6	57	33	0	0	5	0	1	4	0	19	0	0
LNC2472	0	0	0	0	24	13	2	10	0	0	20	3	0	0	0	3	0	0	10	0	0	0	0	0	0	0	12	1	8	0	0	0	0	2	0	1	7	0	0	4	0	20	0	12	0	1	54	35	16
LNC2490	14	19	183	591	92	77	372	213	0	165	280	0	89	16	122	203	240	254	21	71	1	70	131	287	7	14	349	44	52	211	18	35	1	82	107	78	84	77	89	125	163	106	2	147	5	123	161	314	93
LNC2492	0	30	0	1	1	21	28	0	1	22	43	6	1	34	13	47	3	0	0	1	5	0	2	168	28	53	138	1	6	82	1	0	14	2	0	6	10	21	1	10	0	12	67	4	65	0	26	1	7
LNC2513	1	7	0	33	5	13	4	31	4	0	14	14	2	5	3	5	11	7	1	10	6	17	0	8	2	0	1	42	4	11	6	5	16	23	12	0	4	5	22	3	0	1	5	1	10	3	0	6	3
LNC2514	0	0	0	0	0	7	0	4	0	0	9	0	0	4	3	0	2	0	0	0	0	0	0	0	0	0	0	0	0	1	0	0	0	7	0	0	0	2	0	0	0	0	1	28	0	2	0	2	0
LNC2519	0	3	0	1	0	0	0	2	0	0	1	0	0	0	0	0	2	0	1	3	0	0	0	0	0	0	0	2	0	1	0	0	1	1	0	0	0	0	1	1	0	0	0	1	0	0	3	0	0
LNC2524	0	0	0	0	0	0	0	0	0	0	10	0	0	0	0	0	1	0	0	0	0	0	0	0	0	0	0	0	0	0	0	0	0	0	0	0	0	0	0	0	0	0	0	0	0	0	1	0	0
LNC2525	0	4	13	0	34	0	18	106	16	44	23	31	7	45	6	17	62	0	29	3	1	15	2	0	0	4	20	0	4	3	8	3	4	0	12	8	25	3	10	31	8	6	5	17	3	11	12	1	7
LNC2528	0	0	0	0	0	0	6	0	0	1	0	0	0	0	0	0	9	0	0	2	0	0	0	0	0	1	0	0	1	0	0	0	0	0	0	0	3	0	0	0	0	1	0	5	0	0	0	0	0
LNC2534	11	5	75	1	3	30	134	32	3	52	36	112	13	33	58	182	0	5	16	118	1	1	59	226	4	32	14	6	6	18	16	10	32	55	11	22	78	2	116	10	11	19	23	20	0	12	24	44	86
LNC2539	0	12	20	13	0	40	0	1	2	0	71	0	0	41	157	1	76	53	0	77	0	12	13	11	0	10	3	27	0	5	7	82	5	0	67	2	4	2	4	5	0	5	1	115	0	77	22	50	8
LNC2552	0	6	11	0	0	31	19	0	27	0	4	0	0	43	0	71	8	0	0	0	19	0	61	6	0	78	1	3	28	3	0	5	0	0	0	19	0	16	0	38	0	3	12	55	4	0	7	0	23
LNC2558	12	123	101	72	83	479	271	143	67	119	210	16	128	68	42	327	164	84	361	102	37	153	31	238	20	89	154	105	134	182	216	145	47	69	69	116	255	65	112	55	17	103	586	97	53	21	65	52	83
LNC2560	3	55	7	0	1	11	0	3	6	0	1	1	24	0	0	51	0	0	9	0	0	0	0	1	0	0	24	0	0	1	0	0	1	0	0	0	2	17	0	0	0	0	0	0	0	0	46	5	0
LNC2563	0	0	3	0	0	0	17	0	0	0	0	0	0	0	0	0	0	0	0	0	0	0	0	2	0	0	1	0	0	0	0	0	0	0	2	0	1	2	0	0	0	12	0	38	0	0	0	0	1
LNC2584	0	0	0	0	0	0	0	0	8	0	0	0	2	0	0	2	0	0	0	0	0	0	0	2	0	0	0	0	0	0	0	0	0	0	7	0	0	3	0	0	0	0	0	0	0	0	0	0	0
LNC2591	0	11	10	0	0	0	0	0	0	0	0	0	0	0	0	0	0	0	0	0	0	0	0	8	0	1	0	0	0	0	0	0	0	0	0	0	3	0	15	4	0	14	0	0	0	0	0	3	0
LNC2610	0	1	52	0	82	12	11	0	176	14	2	1	4	1	0	20	4	0	0	0	1	0	0	3	0	2	76	36	0	22	4	0	0	1	0	3	0	0	5	31	5	8	12	121	12	0	0	0	5
LNC2611	10	0	0	0	0	0	0	0	0	0	0	12	0	0	0	0	0	0	0	0	0	0	0	0	17	0	0	0	0	0	0	0	0	0	0	0	0	0	0	0	0	0	0	0	0	0	0	0	0
LNC2614	0	0	0	1	4	14	17	0	0	0	0	0	0	3	0	0	0	0	0	0	0	0	0	0	0	0	0	0	0	0	0	0	0	0	0	0	0	1	0	0	0	0	0	0	0	0	0	0	0
LNC2616	19	0	0	0	0	0	55	0	0	0	0	0	0	0	0	0	0	0	0	0	0	1	0	0	0	0	2	0	0	0	0	0	0	0	0	21	4	0	0	0	0	1	0	0	0	0	0	0	8
LNC2617	0	9	124	12	28	94	70	42	65	8	40	2	76	27	55	31	91	1	13	15	2	0	10	57	2	46	109	12	14	71	6	9	61	29	22	80	31	5	295	58	4	32	47	2	29	2	15	0	17
LNC2620	0	1	18	0	104	26	0	51	0	46	4	4	5	13	4	22	1	0	34	3	0	6	0	0	0	0	0	43	7	0	10	0	7	3	7	19	2	2	43	12	56	2	0	1	0	0	0	1	5
LNC2621	0	0	0	0	0	1	1	0	4	0	6	1	0	0	0	0	0	0	0	0	0	0	0	0	0	1	0	0	0	0	0	0	0	0	0	0	0	0	0	0	1	0	0	0	0	0	0	0	1
LNC2627	7	69	23	50	0	46	42	58	5	35	47	77	1	77	13	58	9	30	42	190	11	7	4	153	9	22	45	14	17	2	10	16	0	17	17	22	8	11	15	7	9	0	12	0	5	21	39	36	9
LNC2628	0	41	0	0	0	20	18	51	0	0	0	3	8	0	1	0	0	0	0	7	0	4	0	0	2	11	1	0	0	0	0	0	3	0	0	0	0	1	0	10	7	0	0	0	0	0	2	59	13
LNC2664	0	7	7	0	0	11	21	40	13	0	12	2	11	0	0	0	0	1	3	0	0	0	0	0	0	0	0	6	1	1	1	0	0	0	0	2	2	63	0	4	1	3	1	6	0	15	33	21	0
LNC2675	31	199	132	230	138	551	202	614	280	209	260	92	278	394	294	267	176	359	56	430	111	54	211	671	28	93	409	169	108	34	177	63	106	100	23	93	123	137	510	281	264	95	261	25	190	171	211	321	185
LNC2679	1496	103	37	88	260	55	21	126	137	0	58	9	72	50	54	122	135	0	391	223	29	11	207	123	11	32	83	78	74	306	253	87	97	22	60	50	379	128	190	262	23	21	34	25	75	109	10	82	42
LNC2682	0	11	1	0	33	43	31	50	33	0	12	13	4	19	4	8	5	0	6	0	0	0	3	0	2	0	0	10	2	0	9	0	3	0	0	5	8	8	34	34	8	0	0	0	1	0	0	0	1
LNC2705	1	111	40	2	343	19	67	90	13	127	2	50	4	7	15	20	92	0	65	110	15	0	6	3	12	29	24	16	54	48	11	41	32	7	1	45	38	15	97	63	23	76	0	14	126	172	157	22	6
LNC2712	0	11	1	30	0	1	66	119	10	0	3	0	0	24	0	3	15	0	0	0	0	0	2	12	1	7	1	3	2	2	3	22	0	37	0	34	2	0	0	6	15	9	1	27	6	1	5	24	0
LNC2714	0	40	100	0	0	1	24	68	90	26	35	0	0	0	2	114	0	0	19	111	0	0	7	105	0	10	0	0	22	0	0	11	7	0	7	25	66	6	0	0	0	0	0	0	43	0	20	3	14
LNC2735	385	85	226	17	111	65	126	62	177	266	38	133	478	0	384	7	0	5	3	0	749	0	627	968	30	164	49	0	0	5	48	260	211	164	6	10	370	401	0	55	0	71	20	0	53	0	0	3	32
LNC2739	0	1	3	2	0	24	6	3	0	0	3	14	0	0	0	5	10	1	0	0	0	0	12	2	20	1	0	1	0	0	1	0	0	0	0	1	0	6	0	0	5	0	0	0	1	0	3	0	1
LNC2759	0	0	0	0	0	3	0	0	0	0	0	0	0	0	0	0	0	0	0	0	0	0	0	0	0	0	0	0	0	0	0	0	0	0	0	0	0	0	0	0	0	0	0	0	0	0	0	0	0
LNC2767	0	0	0	0	0	1	0	1	0	47	1	7	0	11	0	0	0	0	0	0	0	0	0	0	0	0	0	0	0	0	1	0	0	0	0	0	0	0	1	0	0	0	0	4	2	0	0	1	0
LNC2776	0	0	0	0	0	0	0	0	0	0	0	0	0	0	0	0	0	0	0	0	0	0	0	0	0	0	0	0	0	0	0	0	0	0	0	0	0	1	0	0	0	0	0	0	0	0	0	0	0
LNC2793	0	1	6	0	0	7	0	0	2	0	0	0	0	0	0	0	0	0	0	0	0	11	0	0	0	0	0	0	0	0	0	0	0	0	1	0	0	0	0	0	0	0	0	0	0	3	0	0	7
LNC2801	0	0	0	0	0	1	1	0	2	0	0	0	0	0	0	0	0	0	0	0	0	0	0	3	0	0	1	0	0	0	0	0	0	0	0	0	2	0	0	0	3	0	0	0	0	0	0	3	0
LNC2805	0	5	13	0	10	12	9	10	0	3	2	0	7	3	0	0	7	1	11	0	5	10	0	0	2	0	0	1	11	0	0	0	0	0	20	2	1	0	28	4	1	4	0	0	0	7	0	0	4
LNC2817	0	2	25	0	22	42	0	26	2	10	5	0	5	2	1	0	0	0	16	0	1	0	55	0	3	0	0	21	8	0	0	0	0	0	5	0	16	0	10	2	12	21	0	0	35	4	35	9	12
LNC2824	0	0	0	0	0	0	0	0	0	0	0	0	0	0	0	0	0	0	0	0	0	0	0	0	0	0	0	1	0	1	0	0	0	0	0	0	0	0	2	0	0	0	0	0	0	0	0	0	2
LNC2849	26	431	322	326	988	2579	476	469	42	37	635	387	276	134	92	596	118	2987	628	1999	935	71	1385	1934	236	553	695	1066	236	236	889	38	640	455	147	134	151	58	493	124	72	141	173	131	228	50	1829	1622	686
LNC2862	2	2	0	0	4	5	18	0	1	0	2	4	0	28	0	10	9	0	0	0	0	9	0	10	0	0	0	0	4	0	0	0	0	0	4	0	3	0	4	0	0	0	0	0	0	2	2	0	0
LNC2867	0	3	6	17	0	0	0	19	0	0	27	0	0	1	0	13	29	0	0	0	0	0	7	0	0	0	0	11	4	0	78	0	0	0	0	0	6	0	93	0	2	0	0	0	6	0	0	15	2
LNC2880	0	0	0	0	0	5	2	0	0	0	1	0	0	0	0	0	0	0	0	0	0	0	0	0	0	0	0	1	0	0	0	0	0	0	0	1	0	0	0	0	0	0	2	0	0	0	5	5	2
LNC2883	95	0	1	0	0	76	0	2	11	22	12	0	3	5	0	0	48	0	55	0	0	0	4	0	3	2	2	10	14	0	0	13	22	20	1	6	2	0	8	10	0	35	0	34	5	23	21	0	16
LNC2896	21	30	5	62	0	142	28	4	0	0	109	0	3	13	15	21	0	54	19	0	4	0	30	67	1	21	5	23	5	1	63	0	42	11	0	2	2	26	68	15	6	19	0	16	8	3	51	3	16
LNC2899	0	0	0	0	0	5	0	10	0	0	2	0	0	5	0	0	0	0	0	0	0	0	0	0	3	3	0	2	4	0	0	0	0	0	0	0	0	0	0	0	0	0	5	0	0	0	0	0	0
LNC2900	0	23	12	1	0	9	1	1	0	10	0	2	0	0	1	1	1	0	1	4	1	0	0	0	18	0	1	2	6	4	3	1	0	2	0	0	0	2	3	0	0	2	0	0	0	1	1	0	1
LNC2904	0	0	0	0	0	0	0	0	0	0	0	0	0	0	0	0	0	0	0	0	0	0	0	0	0	0	0	0	0	0	0	0	0	0	0	0	0	0	0	0	0	0	0	0	0	0	0	0	0
LNC2905	13	0	0	10	0	0	0	0	0	0	29	0	0	0	0	4	1	0	0	0	0	0	2	0	0	16	0	0	9	4	0	6	15	0	39	18	2	4	0	5	0	8	28	0	0	19	136	0	1
LNC2907	2	0	19	1	17	44	15	17	0	67	17	0	52	34	39	46	0	101	1	56	0	2	0	3	0	1	0	32	0	4	1	2	3	0	62	0	20	15	1	56	0	0	0	16	2	54	98	0	0
LNC2908	0	0	0	2	2	3	0	2	0	1	0	0	0	0	0	3	0	0	3	7	0	0	0	0	2	0	0	7	0	20	0	0	0	2	0	0	0	16	10	12	2	6	19	2	3	0	19	9	0
LNC2910	0	0	0	0	0	0	0	0	0	0	0	0	0	0	0	0	0	0	0	0	0	0	0	0	0	0	0	0	0	0	0	0	0	0	0	0	0	0	0	0	0	0	0	0	0	0	0	0	0
LNC2913	13	13	13	11	67	93	145	35	37	160	28	27	25	46	80	65	171	2	14	58	0	6	4	37	116	14	57	35	38	52	32	75	17	3	30	61	33	15	43	141	33	27	43	57	151	159	45	20	47
LNC2917	5	0	0	0	0	1	0	1	0	0	0	0	0	0	0	0	0	0	0	0	3	0	0	1	1	0	0	0	0	1	0	0	0	0	1	0	0	0	0	2	0	0	0	0	0	0	0	0	0
LNC2919	34	9	38	112	58	16	7	81	1	2	10	34	6	15	1	63	10	0	79	4	0	1	0	34	1	25	43	37	25	22	8	6	7	2	0	27	41	14	17	94	0	31	26	12	8	38	141	12	8
LNC2931	0	0	1	0	0	0	3	2	0	46	0	0	1	0	2	0	0	0	0	1	0	0	0	5	0	3	0	0	1	1	0	5	0	1	0	0	1	0	18	11	0	7	14	9	4	8	12	0	9
LNC2933	15	0	53	0	37	2	16	0	102	630	125	0	19	0	4	8	91	0	0	8	0	0	1	26	0	0	57	0	0	0	1	5	0	7	0	0	39	35	15	0	0	0	3	0	82	0	0	0	0
LNC2934	0	0	0	0	1	1	8	21	0	0	16	0	17	0	1	1	0	13	0	1	0	0	0	8	0	0	0	0	0	0	0	0	9	0	0	0	3	0	0	0	0	0	0	1	0	0	0	0	3
LNC2946	0	17	34	79	49	127	172	62	2	3	77	8	15	14	5	21	1	35	99	108	4	38	21	97	6	16	55	0	9	47	10	2	8	6	4	22	4	25	22	8	20	9	22	23	30	14	18	25	22
LNC2951	29	171	25	127	44	164	175	161	5	351	381	31	71	97	0	45	2	75	57	144	12	148	101	195	12	76	79	21	60	233	15	3	10	23	169	21	19	17	26	5	62	42	9	33	114	139	211	14	135
LNC2965	0	0	218	0	0	4	67	2	1	27	18	0	0	0	0	1	0	0	0	0	0	0	0	7	0	0	9	0	8	55	0	7	25	0	0	0	2	4	0	2	4	0	2	0	0	0	0	1	0
LNC2967	0	2	15	0	0	0	0	29	0	1	0	0	0	0	1	1	4	0	0	0	0	0	0	0	0	1	3	16	4	0	2	0	0	0	0	7	26	2	1	1	0	1	0	0	16	0	0	0	15
LNC2968	125	11	166	4	14	6	2	31	5	2	10	41	81	14	0	43	75	1	3	0	2	0	68	82	36	12	10	35	25	13	14	0	31	1	1	29	29	8	27	23	3	7	0	34	54	1	42	2	4
LNC2974	0	0	1	0	21	0	0	0	0	0	1	0	0	0	8	0	0	1	2	13	0	0	0	0	0	0	0	0	0	0	1	0	13	0	0	1	0	0	5	0	1	0	0	2	0	0	0	0	1
LNC2980	0	1	0	0	6	49	1	0	0	12	26	0	7	6	0	4	2	1	6	1	0	1	1	1	12	1	1	1	2	0	0	1	5	0	7	1	10	0	1	0	1	0	6	1	6	7	3	0	1
LNC2984	0	1	21	0	0	7	19	7	0	0	0	3	35	1	0	0	1	0	0	0	0	0	0	29	0	3	6	0	0	20	0	1	0	0	0	0	0	0	1	1	0	0	0	0	76	0	0	0	0
LNC2992	0	0	0	0	0	14	0	0	0	0	0	0	0	0	0	3	0	0	0	0	0	0	0	0	0	0	0	0	0	0	0	0	0	0	0	0	11	0	0	5	0	0	2	0	0	0	0	0	0
LNC2997	0	0	21	0	1	21	0	4	68	2	0	0	0	0	0	0	0	0	0	0	0	0	16	4	0	0	0	0	0	0	0	1	0	4	2	2	9	0	0	0	0	2	0	0	0	0	0	0	1
LNC3002	0	0	1	0	1	5	25	0	0	0	16	0	0	0	10	0	0	2	0	0	0	0	0	0	0	0	0	0	0	0	0	0	1	0	0	0	0	0	0	18	0	0	0	1	0	0	0	0	0
LNC3004	397	3	0	7	10	33	215	7	2	24	2	0	68	2	4	0	51	9	5	0	0	11	26	43	0	0	24	10	14	1	7	108	4	2	0	25	78	0	30	1	0	0	0	1	8	3	0	1	2
LNC3010	0	3	0	1	12	17	7	10	0	7	5	0	0	6	2	0	16	0	0	24	0	0	0	7	0	2	23	0	3	6	3	0	0	6	2	1	9	2	0	1	2	1	17	0	6	0	7	2	0
LNC3019	0	38	0	2	0	27	0	6	0	0	1	38	0	0	10	0	0	11	0	68	1	0	6	12	0	0	36	0	9	0	0	2	2	0	67	0	48	14	0	20	0	11	0	14	13	13	1	2	0
LNC3035	52	0	1	4	0	7	5	25	16	126	0	3	0	1	5	7	14	2	0	19	0	9	0	39	1	3	3	13	18	4	2	0	12	0	2	4	4	0	7	20	3	10	0	0	0	0	1	27	20
LNC3038	0	0	5	128	0	1	1	50	0	0	1	0	3	0	15	2	0	0	0	0	0	0	3	0	0	1	0	0	0	0	0	0	10	0	0	26	1	0	0	1	0	27	0	0	0	0	27	0	3
LNC3046	0	0	0	0	32	2	2	1	73	2	0	5	0	4	0	10	0	0	0	0	1	0	0	0	0	0	0	0	0	0	5	0	1	0	0	5	3	0	0	10	1	0	0	4	0	16	0	0	6
LNC3078	2	66	5	0	0	75	67	123	9	2	10	8	17	22	10	20	1	75	9	108	0	32	20	54	7	43	4	8	27	1	11	6	6	27	0	5	24	17	30	78	8	1	1	1	3	174	0	150	37
LNC3079	105	95	60	170	129	125	176	62	286	102	71	101	38	77	166	310	280	122	245	109	17	63	114	297	56	40	93	116	257	105	211	50	161	70	157	86	168	31	417	93	58	156	91	163	347	320	300	10	175
LNC3087	8	0	0	0	1	0	1	0	0	0	0	1	0	0	0	0	20	0	0	0	0	0	1	2	1	1	0	0	0	0	0	0	0	0	1	0	0	0	0	2	0	0	0	0	0	0	0	2	0
LNC3108	2	0	9	0	0	32	1	37	1	0	0	0	0	18	4	0	1	0	1	0	0	19	0	6	0	0	1	54	11	0	4	0	26	0	33	2	3	0	13	13	0	6	0	0	1	0	3	0	11
LNC3119	0	20	0	0	0	6	0	0	0	0	0	0	0	2	12	0	0	0	0	0	0	0	0	1	0	0	0	0	1	0	0	0	0	0	0	0	0	2	17	0	0	0	0	2	0	14	0	0	5
LNC3127	0	6	7	0	0	18	0	6	18	0	3	0	0	4	25	3	9	0	1	11	1	1	0	8	6	8	1	29	8	75	5	0	2	1	9	1	44	0	37	3	6	35	0	32	8	0	0	19	18
LNC3129	71	6	22	24	57	252	58	11	105	14	26	11	13	30	9	60	12	57	64	7	27	21	37	305	80	5	61	1	3	3	69	0	0	92	36	15	37	15	70	146	21	63	0	155	27	109	0	24	18
LNC3140	0	0	0	0	1	0	0	0	0	0	0	0	0	0	0	0	0	0	0	0	0	0	0	0	0	0	0	0	0	0	0	0	0	0	0	0	0	0	0	0	0	0	0	0	0	0	0	0	0
LNC3147	0	0	30	1	18	34	43	9	5	0	0	19	21	6	35	1	0	0	0	0	0	0	1	60	0	0	43	13	7	0	37	0	14	0	0	0	1	1	208	9	0	23	27	0	0	0	20	0	0
LNC3151	0	19	23	336	262	111	200	57	71	34	41	12	198	45	294	135	251	26	2	71	32	90	61	105	15	51	138	126	141	90	92	57	51	134	333	24	86	13	129	306	36	153	187	224	49	179	48	47	407
LNC3178	699	220	2121	2311	2441	1862	3210	1574	1824	1097	1227	5	3240	1037	1636	2376	3028	341	650	1220	1890	2402	2085	2527	518	2348	4249	1139	1154	1950	2529	1838	2554	3062	2436	482	1655	2135	781	1283	539	2402	2772	1234	332	3470	6508	1779	1638
LNC3179	145	87	48	44	100	129	75	113	244	77	27	0	63	83	77	130	142	51	144	232	8	118	32	134	70	50	96	223	130	141	88	50	52	38	100	164	124	151	327	52	74	154	190	195	90	104	143	48	99
LNC3181	0	1	0	0	0	25	0	11	0	0	10	0	0	0	0	0	37	0	0	0	0	0	0	44	1	0	9	0	6	0	0	0	0	0	0	2	0	0	0	1	0	0	2	0	0	0	0	0	0
LNC3184	2	3	8	0	3	0	1	0	0	0	4	0	0	0	0	0	0	0	1	0	1	0	0	2	0	2	6	0	2	0	3	4	6	2	3	1	0	1	1	0	0	1	1	3	2	0	0	0	0
LNC3185	0	0	8	0	0	3	0	0	0	0	7	0	0	0	33	0	0	0	0	0	0	0	0	0	0	0	0	0	16	0	2	0	0	0	0	0	0	0	36	12	0	2	0	0	0	0	0	0	0
LNC3188	0	9	0	0	2	1	0	0	0	61	4	0	0	0	0	18	102	0	14	0	1	1	2	0	2	1	0	0	11	23	10	0	0	5	0	20	5	9	1	4	0	5	6	0	2	0	0	0	7
LNC3190	0	0	2	4	0	0	0	0	0	0	0	7	1	1	0	1	0	0	0	1	0	0	0	0	0	0	2	3	1	4	0	0	1	0	0	0	1	0	2	0	0	1	2	10	0	1	1	3	0
LNC3195	0	0	0	0	0	0	0	0	0	0	0	0	0	0	0	0	0	0	0	0	0	0	0	0	0	0	0	0	0	0	0	0	0	0	0	0	0	0	0	0	0	0	0	0	0	0	0	0	0
LNC3199	10	0	0	1	0	5	9	0	0	26	2	0	0	0	4	1	0	0	15	0	1	0	9	0	1	0	0	0	0	5	0	0	0	0	1	0	0	7	1	0	0	0	1	2	0	3	0	1	4
LNC3204	0	0	0	0	0	0	0	0	0	0	0	0	0	0	0	0	0	0	0	0	0	0	0	0	0	0	0	0	0	0	0	0	0	0	0	0	0	0	0	0	0	0	0	0	0	0	0	0	0
LNC3206	0	8	5	0	0	1	0	0	2	0	0	0	0	0	42	0	0	0	0	1	16	0	0	2	1	0	0	0	0	0	0	1	0	0	0	0	17	0	4	1	1	0	0	11	0	25	0	0	2
LNC3208	0	0	0	0	0	0	0	0	0	1	0	0	0	0	0	0	0	0	0	0	0	0	3	0	7	0	3	0	0	0	0	0	0	0	0	0	0	0	0	0	0	0	3	0	0	0	0	0	0
LNC3213	17	1	2	0	3	3	9	0	2	1	12	4	0	48	11	1	38	3	8	2	1	0	12	15	0	23	9	0	4	82	13	10	18	5	19	0	1	6	6	4	1	19	11	0	5	12	17	12	0
LNC3214	0	0	0	0	0	0	1	0	0	0	0	0	0	0	0	0	0	0	0	0	0	0	0	0	0	0	0	0	0	0	0	0	0	0	0	0	0	0	0	0	0	0	0	0	1	0	0	0	0
LNC3224	0	28	10	0	6	0	23	3	0	5	0	0	1	10	44	9	0	0	0	41	0	0	0	0	0	0	0	0	0	0	9	12	22	0	3	10	8	1	11	0	1	2	0	0	4	9	0	14	11
LNC3249	0	0	0	0	0	0	0	1	0	0	0	0	0	0	0	0	0	0	0	0	0	0	0	0	0	0	0	0	0	0	0	0	0	0	0	0	0	9	0	0	0	0	0	0	0	0	0	0	0
LNC3252	0	3	0	0	0	7	0	20	1	0	0	8	0	3	10	6	8	0	4	0	0	5	3	0	0	0	0	3	5	4	6	24	12	0	0	3	9	0	5	2	0	0	0	0	1	1	0	0	1
LNC3255	0	0	0	0	0	0	0	0	0	0	0	0	0	0	0	0	0	0	0	0	0	0	0	0	0	3	0	0	0	0	0	0	0	0	0	0	0	2	0	0	0	0	0	0	0	0	0	3	0
LNC3280	40	0	0	0	1	0	5	2	0	2	0	0	0	0	0	0	0	0	0	0	0	0	0	0	0	0	0	0	0	0	0	1	0	123	0	0	0	0	3	0	0	8	0	0	0	0	0	0	0
LNC3288	65	9	1	7	35	32	16	5	11	0	29	2	45	22	5	65	20	0	17	2	36	1	0	2	7	4	27	0	16	4	65	1	13	10	1	57	27	4	18	7	0	22	8	0	125	1	39	0	10
LNC3292	24	0	0	6	1	7	43	138	0	49	4	0	111	0	1	0	0	2	0	16	0	4	0	2	25	6	8	0	0	0	0	1	10	110	0	0	0	0	1	0	0	0	0	0	0	2	3	58	0
LNC3293	0	12	1	6	1	2	0	41	99	0	0	0	0	7	2	11	2	0	0	0	4	1	0	0	5	1	0	16	5	0	0	0	0	0	5	0	0	0	0	49	0	3	0	13	13	43	0	35	19
LNC3296	95	36	46	7	207	60	8	175	36	6	54	197	24	23	16	39	127	1	0	60	3	6	11	23	0	13	115	24	17	3	10	10	20	20	82	32	21	8	53	27	1	13	0	2	57	34	15	142	84
LNC3301	0	23	4	10	2	47	82	0	1	39	29	1	2	13	0	27	0	0	0	8	0	17	1	89	27	10	39	0	30	31	62	1	1	48	12	54	11	0	18	10	0	0	0	1	0	31	1	16	2
LNC3302	23	55	120	37	142	70	163	46	586	79	36	4	82	135	48	105	2	81	10	369	136	56	2	11	105	118	13	36	29	18	1	21	25	24	0	39	171	0	91	8	5	19	42	34	6	86	99	66	57
LNC3310	0	0	0	2	0	0	0	11	0	0	0	0	4	3	0	7	0	0	0	5	0	0	0	4	0	0	8	0	1	0	6	0	0	0	0	0	3	0	0	8	3	0	0	0	0	2	0	0	0
LNC3322	0	0	0	0	0	0	0	0	0	0	0	0	0	0	0	0	0	0	0	0	0	0	0	0	0	0	0	0	0	0	0	0	0	0	0	0	0	0	0	0	0	0	0	0	0	0	0	0	0
LNC3323	0	1	0	0	0	0	0	0	0	0	0	0	0	0	0	0	0	0	0	0	0	0	0	0	0	0	0	0	0	0	0	0	0	0	0	0	0	0	0	0	0	0	0	0	0	0	0	1	0
LNC3325	0	0	0	0	0	0	0	0	0	0	0	0	0	0	0	0	0	0	0	0	0	0	0	0	0	0	0	0	0	0	0	0	0	0	0	0	0	0	0	0	0	0	0	0	0	0	0	0	0
LNC3327	0	0	0	0	0	0	0	0	0	0	0	0	0	0	0	0	0	0	0	0	0	0	0	0	0	0	0	0	0	0	0	0	0	0	0	0	0	0	0	0	0	0	0	0	0	0	0	0	0
LNC3328	0	0	0	0	0	0	0	0	0	0	0	0	0	0	0	0	0	0	0	1	0	0	0	1	0	0	0	0	0	0	0	0	0	0	0	0	0	0	0	0	0	0	0	0	0	0	0	0	0
LNC3330	0	0	1	0	0	4	6	1	2	0	0	0	0	0	0	0	0	0	0	0	0	0	0	0	0	0	0	0	0	15	0	0	1	0	0	0	0	0	0	0	0	0	0	0	0	0	0	0	0
LNC3352	0	49	88	51	2	71	21	73	122	115	273	11	92	92	14	17	0	227	64	44	133	48	103	150	0	25	25	127	0	114	110	6	42	212	61	42	9	39	1	4	117	11	0	30	1	151	15	28	25
LNC3355	4	5	5	0	0	2	0	0	4	0	0	3	1	0	0	18	1	3	0	0	0	0	1	40	0	0	0	2	3	0	11	6	0	0	22	37	6	0	41	11	0	0	0	0	0	0	0	2	0
LNC3364	19	109	72	128	83	109	71	192	66	123	11	14	112	101	107	76	343	22	45	67	55	100	60	94	52	30	176	112	93	131	215	55	271	132	191	88	89	217	170	171	37	73	240	232	124	484	307	171	81
LNC3376	1	5	7725	12	4	20666	676	3	2191	10174	79	5	0	793	16	13	6813	535	3	20833	1	6	15388	12	5495	9112	9519	7	4964	16786	10127	504	916	9982	5701	8	7179	8473	11	5147	8	6589	3	0	7	24	0	9180	17
LNC3377	7	64	179	11	141	222	174	34	46	87	12	42	76	58	54	30	57	90	150	50	28	115	32	157	14	40	96	61	18	91	102	86	64	93	54	33	45	149	199	65	90	117	51	11	96	261	57	93	76
LNC3391	0	1	0	0	0	13	0	0	0	0	0	0	1	0	0	0	0	0	0	0	0	0	0	0	0	0	0	3	1	0	0	0	2	0	0	0	0	0	0	0	0	0	0	0	0	0	0	0	0
LNC3396	11	0	0	0	0	1	0	0	0	1	0	0	0	0	0	0	0	0	0	0	0	4	0	0	0	0	0	0	3	0	0	0	0	0	0	0	0	1	0	2	0	1	0	0	0	0	0	0	0
LNC3397	187	39	332	23	101	137	100	81	80	20	55	3	77	18	80	99	264	15	101	95	39	79	44	28	96	112	186	210	139	178	88	10	204	21	100	107	164	172	345	248	27	257	102	109	140	1284	340	52	81
LNC3399	0	0	0	0	0	1	0	1	0	0	0	0	0	2	0	0	0	0	0	0	0	0	0	0	0	0	0	0	0	0	0	0	0	0	0	0	0	0	0	0	0	0	0	0	0	11	0	0	0
LNC3402	1	6	1	0	6	4	8	9	0	0	5	0	0	0	10	2	1	0	0	0	1	0	3	0	0	2	0	0	1	0	0	0	6	0	0	0	0	0	2	0	10	0	0	22	0	5	3	1	0
LNC3404	0	0	0	8	0	0	0	0	0	0	0	0	0	7	0	0	1	0	0	0	0	0	0	0	0	0	0	0	0	0	0	0	2	4	0	28	0	0	0	3	0	0	0	0	0	0	0	0	0
LNC3405	0	23	18	1	55	49	38	9	0	0	3	15	0	13	45	4	1	1	0	7	28	7	12	32	0	27	0	0	1	7	2	11	2	2	0	4	14	0	59	6	0	0	0	13	17	0	7	21	8
LNC3408	0	0	0	0	0	18	0	5	0	0	1	0	0	0	0	4	0	0	0	0	0	0	0	1	0	0	0	6	5	0	0	0	0	0	0	3	0	0	3	0	0	7	0	0	0	0	0	0	0
LNC3410	5	0	1	0	0	0	0	0	1	5	1	0	0	0	0	0	0	0	0	0	9	0	0	18	0	0	0	0	0	0	0	0	3	0	9	2	0	0	9	2	0	0	0	0	0	0	0	0	0
LNC3412	0	0	0	0	0	0	0	0	0	2	0	0	0	0	0	0	0	0	0	0	0	0	0	0	0	0	0	0	0	0	0	0	0	0	0	0	0	0	0	0	0	0	0	0	1	0	0	0	0
LNC3414	0	0	0	0	0	0	0	0	0	0	0	0	0	0	0	0	0	0	0	0	0	0	0	0	0	0	0	0	0	0	0	0	0	0	0	0	0	0	0	0	0	0	0	0	0	0	0	0	0
LNC3415	0	0	0	0	0	0	0	0	0	0	0	0	0	0	0	0	0	0	0	3	0	0	0	0	0	0	0	0	0	0	0	0	0	0	0	0	0	0	0	0	0	0	0	0	0	0	0	0	0
LNC3425	3	7	22	0	5	10	0	7	30	1	0	0	1	0	1	5	1	0	2	28	0	0	4	22	0	9	4	15	4	2	0	0	2	2	1	1	10	1	2	3	5	2	10	8	2	30	8	5	2
[truncated: 84 more columns]
