# Supplementary material
Source: HighWire-hosted journal article supplement (https://gut.bmj.com/content/68/3/499)
Supplement: inline-supplementary-material-6 [file inline-supplementary-material-6.xlsx]

## Sheet: DE_lcm_k=2
baseMean	log2FoldChange	lfcSE	stat	pvalue	padj
LSAMP	290.423	-1.93507	0.277353	-6.9769	3.01761e-12	2.61748e-08
RPS3	1254.5	1.20913	0.173213	6.98061	2.93899e-12	2.61748e-08
RPS24	1490.19	1.19678	0.177339	6.74855	1.49331e-11	8.63533e-08
NEAT1	7965.28	-1.61578	0.242995	-6.64943	2.94221e-11	1.02083e-07
MALAT1	99567.1	-1.52014	0.228316	-6.65807	2.77452e-11	1.02083e-07
RPS27A	487.598	1.11291	0.175115	6.35529	2.08036e-10	6.015e-07
RP11-761N21.2	260.921	1.45375	0.236993	6.13413	8.56259e-10	1.90052e-06
RP11-543P15.1	566.535	1.38178	0.225398	6.13043	8.7642e-10	1.90052e-06
RP11-169K16.8	92.3918	1.82074	0.302069	6.02758	1.66435e-09	2.88732e-06
SLC20A1	368.766	-1.38275	0.228916	-6.04043	1.53703e-09	2.88732e-06
RPL23	1362.17	1.23675	0.208133	5.94209	2.81409e-09	4.06824e-06
RP11-160O5.1	5.96905	2.58183	0.434136	5.94706	2.73007e-09	4.06824e-06
BOLA1	7.43565	2.30913	0.390525	5.91289	3.36158e-09	4.44864e-06
RPL31	977.467	1.16891	0.198434	5.89066	3.84653e-09	4.44864e-06
RPS16	2137.23	1.50428	0.255023	5.89859	3.66621e-09	4.44864e-06
DST	4707.64	-0.938148	0.160347	-5.85073	4.89427e-09	5.30661e-06
RPS14	959.083	1.15036	0.199211	5.77458	7.71474e-09	7.87266e-06
PRKAG2-AS1	2.48346	2.4683	0.437747	5.63866	1.71378e-08	1.6517e-05
LRRFIP1	2922.67	-0.766219	0.137605	-5.56823	2.57338e-08	2.0492e-05
DDX18P1	17.8324	-2.10244	0.376835	-5.5792	2.41626e-08	2.0492e-05
RPS15AP1	616.571	1.28478	0.229905	5.58829	2.29312e-08	2.0492e-05
UQCRFS1	129.952	1.60592	0.288496	5.56652	2.5987e-08	2.0492e-05
TOMM7	189.2	1.22706	0.221295	5.54491	2.94107e-08	2.21833e-05
RPL37A	1134.18	1.16822	0.212165	5.50617	3.66721e-08	2.53625e-05
RPS18	321.639	1.26538	0.229667	5.50962	3.59612e-08	2.53625e-05
RPS15AP24	206.669	1.30176	0.236689	5.49985	3.80116e-08	2.53625e-05
ATP5I	34.3265	1.17434	0.214162	5.48344	4.17135e-08	2.64388e-05
RP3-417G15.1	270.743	1.12641	0.205742	5.47487	4.37842e-08	2.64388e-05
RPS15AP5	21.0213	1.32852	0.24274	5.47301	4.42453e-08	2.64388e-05
RPS29	220.464	1.23904	0.226632	5.4672	4.57208e-08	2.64388e-05
ARGLU1	243.883	-1.16263	0.21301	-5.45811	4.81227e-08	2.69301e-05
SREK1	660.366	-0.891222	0.163454	-5.45245	4.96815e-08	2.69336e-05
RP11-175B9.3	262.227	1.30609	0.240037	5.44121	5.29207e-08	2.77123e-05
RPL30	1277.33	1.09674	0.201733	5.43658	5.43127e-08	2.77123e-05
ZNF736	91.876	-1.93894	0.358889	-5.40263	6.56716e-08	3.25506e-05
EEF1B2	382.143	1.0756	0.199526	5.39077	7.01557e-08	3.38073e-05
RP11-791G16.2	7.83804	1.45932	0.271064	5.38365	7.29898e-08	3.42224e-05
RPSA	179.961	1.20792	0.226159	5.34102	9.24258e-08	4.15434e-05
RP11-631M6.2	66.0762	-1.93902	0.364088	-5.32568	1.00578e-07	4.15434e-05
TMOD3	1104.12	-0.801199	0.150359	-5.32858	9.89859e-08	4.15434e-05
SCAPER	159.522	-0.982817	0.184466	-5.32789	9.93586e-08	4.15434e-05
RPL27	943.545	1.15397	0.21636	5.33357	9.62983e-08	4.15434e-05
RP1-278E11.3	130.303	1.31135	0.248783	5.27106	1.35634e-07	5.47206e-05
RP11-40C6.2	32.3797	1.3997	0.26582	5.26561	1.39725e-07	5.50899e-05
COL6A3	636.33	-1.3505	0.256694	-5.26111	1.43185e-07	5.51994e-05
RPL23P8	69.9884	1.30955	0.249256	5.25384	1.48961e-07	5.61778e-05
RPL31P11	90.0613	1.14827	0.218926	5.24502	1.56266e-07	5.64771e-05
RPLP0	618.759	1.0407	0.198365	5.24637	1.55122e-07	5.64771e-05
RPS7	317.142	1.09166	0.20906	5.22174	1.77252e-07	6.14994e-05
RPL8	1222.46	1.0908	0.208758	5.22518	1.7399e-07	6.14994e-05
RP11-778D9.4	112.846	1.18518	0.228924	5.17717	2.25274e-07	7.66284e-05
RP11-69L16.5	67.6151	1.13056	0.218534	5.1734	2.29877e-07	7.66906e-05
CTB-89H12.4	224.441	-1.15013	0.223681	-5.14186	2.72037e-07	8.90433e-05
RPS20	844.616	0.829262	0.161441	5.13663	2.79713e-07	8.98603e-05
ZFAS1	188.678	1.25901	0.24611	5.11565	3.12663e-07	9.86197e-05
NDUFA4	290.201	0.885274	0.173602	5.09943	3.40676e-07	0.000104289
RP11-507E23.1	26.0524	1.13011	0.221662	5.09833	3.4266e-07	0.000104289
KMT2C	1610.26	-0.760861	0.149462	-5.09067	3.56803e-07	0.000106721
MIR4426	195.158	1.12803	0.222756	5.06396	4.10629e-07	0.000120739
AC092933.3	6.89495	1.50484	0.297942	5.05079	4.39984e-07	0.000127214
RP11-112J1.1	1134.63	1.14484	0.227379	5.03494	4.77999e-07	0.000133747
RPL18A	166.317	1.2526	0.248695	5.0367	4.73617e-07	0.000133747
MEF2A	546.315	-0.866754	0.172505	-5.02453	5.04675e-07	0.00013897
RP11-51O6.1	380.701	1.11324	0.221831	5.01839	5.21059e-07	0.000140007
RP11-881L2.1	2.13412	-2.20236	0.438971	-5.0171	5.24582e-07	0.000140007
MYO6	1234.4	-0.797794	0.159269	-5.00909	5.46875e-07	0.000143745
ISLR	67.6835	-1.57666	0.315453	-4.99808	5.79035e-07	0.000149927
RPS18P9	18.8342	1.29185	0.258967	4.98847	6.08594e-07	0.000155263
RP11-1407O15.2	71.3639	-1.26903	0.254625	-4.98391	6.2312e-07	0.000156665
ANKRD10	594.255	-1.02813	0.206752	-4.97274	6.60125e-07	0.000163598
RPL7P9	635.633	1.13375	0.228827	4.95463	7.24678e-07	0.000177066
RPS2	409.056	0.989442	0.200634	4.93157	8.15726e-07	0.000196545
RPL39	70.2187	1.12067	0.227983	4.91558	8.85189e-07	0.00021036
UQCRH	175.869	1.19222	0.243416	4.89786	9.6888e-07	0.000227137
RP1-102E24.1	27.1927	1.10785	0.226505	4.89108	1.00283e-06	0.000231962
CCNE1	11.7043	2.03596	0.418111	4.86942	1.11929e-06	0.000252173
LL22NC03-2H8.5	452.051	-1.63413	0.335568	-4.86975	1.11738e-06	0.000252173
RPL7P1	413.883	1.18013	0.244167	4.8333	1.3429e-06	0.000294895
RPS7P1	388.735	1.04649	0.21641	4.83569	1.32685e-06	0.000294895
ATP5G3	327.327	0.904752	0.187802	4.81758	1.45308e-06	0.000311211
FUNDC2	92.3661	1.10278	0.228795	4.81996	1.43588e-06	0.000311211
API5P2	7.83063	-1.69533	0.352539	-4.80892	1.51748e-06	0.00032104
RPL34	373.371	0.863875	0.179972	4.80006	1.58616e-06	0.000331527
RPL35A	557.233	0.957751	0.200443	4.77818	1.7689e-06	0.000361023
RP11-572P18.1	22.5143	1.07609	0.225123	4.78	1.75292e-06	0.000361023
RP1-90L6.2	7.78323	-2.10065	0.440651	-4.76714	1.8686e-06	0.000376935
IGHA1	109.636	-1.89389	0.397515	-4.76431	1.89496e-06	0.00037786
ZNF720	108.467	-1.07796	0.22643	-4.76069	1.92935e-06	0.000380345
CTB-118N6.1	5.65177	1.47903	0.311367	4.75012	2.03295e-06	0.000387556
RPL9P7	20.7702	1.04683	0.220329	4.75121	2.02202e-06	0.000387556
FBL	380.505	1.38456	0.291427	4.75097	2.0244e-06	0.000387556
RPS21	253.769	1.01997	0.215313	4.73715	2.16747e-06	0.000408709
RP3-368A4.5	77.2903	-1.36781	0.289063	-4.73186	2.22473e-06	0.000414996
RPL39P3	337.244	1.0608	0.224577	4.72353	2.3179e-06	0.000427775
NUDCD2	135.115	1.12616	0.238989	4.71219	2.45067e-06	0.000447518
RPL10	337.76	0.928881	0.19761	4.70058	2.59427e-06	0.000468806
RPPH1	424.268	-1.21643	0.259262	-4.69191	2.70666e-06	0.000484074
RPL35	468.892	1.03075	0.220005	4.68513	2.7978e-06	0.000495268
RBMS1	504.907	-0.762762	0.162878	-4.68302	2.82679e-06	0.000495346
CCNL1	587.277	-0.872809	0.187025	-4.6668	3.05932e-06	0.000530732
CTD-2031P19.4	485.402	0.832591	0.178974	4.65203	3.28677e-06	0.000557799
RPL7A	273.63	0.964215	0.207337	4.65047	3.31181e-06	0.000557799
PDXDC2P	47.2637	-1.42967	0.307316	-4.65211	3.28549e-06	0.000557799
SUPT20H	532.165	-0.823423	0.177725	-4.63313	3.60185e-06	0.000600816
TRMT12	23.6832	1.62221	0.350312	4.63075	3.64342e-06	0.000601962
ZNF207	1185.83	-0.569629	0.123295	-4.62004	3.83659e-06	0.000627898
RP3-340B19.2	110.934	1.00436	0.218275	4.60136	4.19737e-06	0.000680523
AC093106.7	89.8396	0.943269	0.20634	4.57144	4.84379e-06	0.000778056
RPL10A	785.199	0.743315	0.162681	4.56914	4.89719e-06	0.000778335
SLC25A5	430.805	0.927236	0.203091	4.56562	4.98012e-06	0.000778335
RP11-16F15.2	3.69246	1.52496	0.333914	4.56691	4.94956e-06	0.000778335
RPL19	1464.14	0.700202	0.15371	4.55533	5.23024e-06	0.000810126
AC007319.1	35.5877	-1.5623	0.34335	-4.55018	5.36009e-06	0.000815674
GMPSP1	13.0068	1.42577	0.313264	4.55133	5.33068e-06	0.000815674
NKTR	642.655	-0.979996	0.215619	-4.54503	5.49285e-06	0.000828608
SMIM20	76.9887	1.27748	0.281383	4.54001	5.62517e-06	0.000834064
RP1-89D4.1	13.6886	1.18613	0.261194	4.54119	5.59382e-06	0.000834064
SHPRH	246.369	-0.977612	0.215625	-4.53385	5.79194e-06	0.000851513
RP11-169K16.7	36.7106	1.15738	0.255535	4.52924	5.91969e-06	0.000862981
SNRPE	46.2662	1.04149	0.230523	4.51797	6.24361e-06	0.000902617
RPS24P8	15.0342	0.978787	0.217371	4.50285	6.70498e-06	0.000961305
RPS25	957.969	0.746476	0.166412	4.48571	7.26721e-06	0.00102497
RPL13	759.681	0.894984	0.199484	4.48649	7.24053e-06	0.00102497
COX7C	619.711	0.894185	0.199705	4.47753	7.55122e-06	0.00105644
2017-03-01	49.3599	-1.11425	0.249203	-4.47127	7.77574e-06	0.00107915
EIF3K	213.735	1.01105	0.226271	4.46833	7.88332e-06	0.0010854
SETD5	804.598	-0.888244	0.198983	-4.46393	8.04712e-06	0.00109922
MYH9	1214.53	-0.777703	0.174973	-4.44471	8.8011e-06	0.00119282
RPS3AP5	47.6288	1.14626	0.258029	4.44238	8.8969e-06	0.00119646
RBM25	963.645	-0.821368	0.185019	-4.43938	9.02187e-06	0.00120393
SC22CB-1E7.1	120.295	0.96887	0.218369	4.43685	9.12831e-06	0.00120884
RPL30P4	67.4014	1.02821	0.232278	4.42666	9.57052e-06	0.00123945
RPL10AP6	240.177	0.820213	0.185293	4.42658	9.57383e-06	0.00123945
RAB7A	3068.43	-0.513137	0.115874	-4.4284	9.49369e-06	0.00123945
NPM1	531.19	0.966249	0.218953	4.41303	1.01933e-05	0.00127218
BRWD3	433.021	-0.661047	0.149648	-4.41735	9.99197e-06	0.00127218
RPS13	1218.91	0.825776	0.187071	4.41424	1.01368e-05	0.00127218
CLP1	15.9484	1.64419	0.372562	4.4132	1.01855e-05	0.00127218
ATP5L	187.158	0.798009	0.180617	4.41823	9.95145e-06	0.00127218
RPL11	1025.41	0.856977	0.194454	4.40709	1.04766e-05	0.00129821
RP3-368A4.6	182.903	-1.19942	0.27277	-4.39718	1.09667e-05	0.00133042
RPL34P18	213.912	0.975293	0.221749	4.39818	1.09161e-05	0.00133042
SLC12A6	289.124	-0.943492	0.214474	-4.39909	1.08705e-05	0.00133042
PLAT	1146.01	-1.55047	0.352739	-4.39551	1.1051e-05	0.00133134
LRRC69	9.02727	-1.74965	0.398383	-4.39188	1.12373e-05	0.00134445
FTH1P4	3.72214	-1.92896	0.439428	-4.38972	1.13498e-05	0.00134861
AL591069.1	22.4782	-1.83563	0.41849	-4.38631	1.15292e-05	0.00135365
TIMM8B	53.7979	1.10877	0.252801	4.38595	1.15483e-05	0.00135365
RPS5	1047.86	1.14875	0.262034	4.38399	1.16526e-05	0.00135671
COX7A2L	149.582	0.919029	0.210029	4.37572	1.21032e-05	0.00139978
RPL31P49	285.818	0.99319	0.227244	4.37059	1.23912e-05	0.00142359
CKS1B	42.8673	0.979943	0.224917	4.35692	1.31907e-05	0.00150547
RPL37	1235.3	0.748039	0.171996	4.34916	1.36661e-05	0.00154954
SLC24A1	64.4642	-1.19689	0.275424	-4.34563	1.38878e-05	0.00156445
RP11-270C12.3	88.6725	0.915493	0.210819	4.34256	1.40833e-05	0.00157624
TPM4	3754.36	-0.593164	0.136791	-4.33629	1.44909e-05	0.00161146
UBA52P5	35.371	1.11741	0.258027	4.33059	1.48712e-05	0.00164322
PTPRK	1197.06	-0.722087	0.166908	-4.32625	1.51666e-05	0.00166526
RPS4XP11	156.062	0.768838	0.178038	4.31838	1.57176e-05	0.0017149
RPS3AP6	651.261	1.0775	0.24979	4.3136	1.60618e-05	0.0017415
KIDINS220	498.736	-0.648377	0.150412	-4.31067	1.62764e-05	0.00174298
RP11-98L4.1	53.013	-1.00078	0.232118	-4.31153	1.62127e-05	0.00174298
GAS5	343.506	1.03804	0.240898	4.30906	1.63947e-05	0.00174488
DGKH	740.243	-0.798654	0.185556	-4.30412	1.67654e-05	0.00177345
COL1A2	2003.79	-1.15764	0.269233	-4.29979	1.70963e-05	0.00177597
HERC4	218.106	-0.837853	0.194776	-4.30163	1.69549e-05	0.00177597
FBXO3	193.394	-0.884052	0.20556	-4.30069	1.70267e-05	0.00177597
ZRANB2	437.399	-0.718371	0.1673	-4.2939	1.75561e-05	0.00180616
SFRP2	219.771	-1.17329	0.273278	-4.29341	1.75952e-05	0.00180616
AC099535.4	4.83647	1.38351	0.322449	4.29064	1.78162e-05	0.00181809
RP11-425L10.1	503.331	0.990261	0.230992	4.28699	1.81107e-05	0.00183734
C5	37.4338	1.67626	0.391196	4.28497	1.82765e-05	0.00184338
PRPF38B	522.266	-0.758321	0.177156	-4.28052	1.86461e-05	0.00186979
CLIP4	222.034	-1.12437	0.263601	-4.26543	1.99521e-05	0.00197788
LMO7	1934.75	-0.933065	0.218742	-4.26559	1.99372e-05	0.00197788
AC016700.6	7.95715	1.22398	0.287889	4.25158	2.12269e-05	0.0020923
FILIP1L	339.312	-1.2235	0.288418	-4.24211	2.21425e-05	0.00215802
RP11-460N11.2	141.498	-1.44795	0.341275	-4.24278	2.20771e-05	0.00215802
PPIA	762.467	0.605364	0.14319	4.2277	2.36095e-05	0.00227636
RP11-215A21.2	54.6063	1.12365	0.26579	4.22761	2.36192e-05	0.00227636
RPL10AP2	36.8592	0.920395	0.218022	4.22157	2.42608e-05	0.00231317
RP11-345J4.8	24.2878	-1.19508	0.283093	-4.2215	2.42677e-05	0.00231317
DOCK9	584.033	-0.719324	0.170493	-4.21907	2.45307e-05	0.00232546
RPL38	643.931	0.867187	0.205701	4.21576	2.48933e-05	0.00233432
RPS19	903.34	0.895731	0.212453	4.21614	2.4852e-05	0.00233432
RPL13A	508.78	0.844219	0.200388	4.21293	2.52076e-05	0.00235109
RP5-1049G16.4	2.41942	-1.84666	0.438505	-4.21125	2.53958e-05	0.00235597
DSP	3382.7	-0.768226	0.182552	-4.20827	2.57337e-05	0.00236206
RP11-318K12.1	16.5293	-1.66346	0.395235	-4.20879	2.56747e-05	0.00236206
RP11-79E3.1	29.7867	0.97794	0.23252	4.20582	2.60132e-05	0.00236271
UBA52	330.043	0.86279	0.205106	4.20655	2.59304e-05	0.00236271
BAG3	205.084	-0.923189	0.219633	-4.20332	2.63023e-05	0.00237652
POLR1E	29.9821	1.43268	0.341151	4.19954	2.67455e-05	0.00240404
RP11-29G8.3	56.1695	-1.55286	0.370499	-4.19128	2.77382e-05	0.00248042
RPL13AP5	1380.11	0.958416	0.228996	4.1853	2.84795e-05	0.00252073
RPL28	1092.28	0.823002	0.196632	4.18548	2.84559e-05	0.00252073
CCNT2	522.251	-0.591366	0.141775	-4.17116	3.0305e-05	0.00266306
LSM5	74.6659	1.09824	0.263335	4.17049	3.03947e-05	0.00266306
BAZ2B	1071.05	-0.694101	0.167093	-4.15399	3.26727e-05	0.00284828
RPL26	150.448	0.819606	0.197489	4.15014	3.3227e-05	0.00288211
RPS9	583.806	0.798006	0.192552	4.14437	3.40745e-05	0.00294091
ASPN	117.77	-1.2017	0.290044	-4.14318	3.42515e-05	0.00294156
ODC1	265.524	0.896136	0.216524	4.13874	3.49226e-05	0.00295746
MAP4K4	942.768	-0.748898	0.180939	-4.13895	3.48892e-05	0.00295746
RPL7P23	23.3982	1.08364	0.261839	4.13857	3.4948e-05	0.00295746
EEF1B2P3	388.522	0.891312	0.215526	4.13552	3.54151e-05	0.00298244
LUC7L3	587.867	-0.690898	0.167449	-4.12602	3.69098e-05	0.00309329
SNRNP27	44.4031	-0.961627	0.233721	-4.11442	3.88149e-05	0.00323731
FAU	276.885	0.724162	0.176249	4.10875	3.97807e-05	0.00330199
FOXC1	179.924	-1.1887	0.289792	-4.1019	4.09763e-05	0.00336899
AC018720.10	11.7743	-1.41195	0.344183	-4.10233	4.0901e-05	0.00336899
UGDH	742.238	0.71949	0.175479	4.10015	4.12884e-05	0.00337864
RPL37P23	116.153	0.896323	0.218921	4.09428	4.23483e-05	0.0034491
NDUFV1	57.667	1.02803	0.251299	4.09087	4.29761e-05	0.00348388
RP11-466H18.1	417.378	0.79404	0.194205	4.08867	4.33847e-05	0.00350064
RLIMP1	12.8382	-1.70215	0.416425	-4.08752	4.36016e-05	0.00350186
RPL37AP1	3.27541	1.31676	0.322466	4.0834	4.43807e-05	0.003548
ARAP2	391.818	-0.666056	0.163636	-4.07035	4.69433e-05	0.00368494
PNISR	632.129	-0.917545	0.225395	-4.07084	4.68447e-05	0.00368494
MMP2	142.212	-1.35555	0.332884	-4.07214	4.65835e-05	0.00368494
PLEKHM1	93.4298	-1.01819	0.250001	-4.07274	4.64642e-05	0.00368494
RPL22	332.8	0.732643	0.1802	4.06572	4.78841e-05	0.00374186
RP11-422P24.9	43.9914	1.09713	0.270117	4.06171	4.87156e-05	0.00378977
COL1A1	3143.24	-1.21447	0.299134	-4.05994	4.90857e-05	0.00380151
RPL35P5	94.74	1.02088	0.251762	4.05492	5.01508e-05	0.00386674
SHFM1	405.766	0.713086	0.175919	4.05348	5.04607e-05	0.00387064
RPS18P12	50.5276	1.11804	0.275881	4.05262	5.06477e-05	0.00387064
RPL6	386.458	0.788781	0.194803	4.04912	5.14114e-05	0.00389469
AHCY	165.708	0.891487	0.220141	4.04961	5.13031e-05	0.00389469
MRPL33	35.3632	1.22325	0.302374	4.04548	5.22161e-05	0.00390069
RPS4X	2036	0.595177	0.147055	4.04732	5.18084e-05	0.00390069
MAPK6PS3	75.8664	-1.34464	0.332446	-4.0447	5.239e-05	0.00390069
UQCR11	123.979	0.99372	0.245648	4.04531	5.22546e-05	0.00390069
ALDH2	384.188	0.95438	0.236237	4.03993	5.34669e-05	0.00396387
RP11-159C21.4	432.72	0.885894	0.219436	4.03714	5.41074e-05	0.00399427
COX6C	447.696	0.786588	0.194933	4.03516	5.4565e-05	0.00401099
RPL15P3	312.841	0.851989	0.211376	4.03067	5.56173e-05	0.00407109
ATP5G2	61.7879	0.958756	0.238454	4.02072	5.80205e-05	0.00421147
PNN	653.046	-0.680933	0.169326	-4.02143	5.78463e-05	0.00421147
SRP9	284.783	0.818627	0.203882	4.0152	5.9395e-05	0.00429327
BCLAF1	1530.38	-0.467129	0.116411	-4.01275	6.00142e-05	0.00432003
RP11-234A1.1	523.589	0.829249	0.206778	4.01033	6.06331e-05	0.00434654
RP1-68D18.4	3.64856	-1.66879	0.4163	-4.00862	6.10757e-05	0.00436026
MMP12	93.9255	-1.43731	0.359096	-4.00256	6.26608e-05	0.00443769
RPSAP58	219.984	0.986205	0.246396	4.00252	6.2672e-05	0.00443769
RPL12	238.069	0.804855	0.201232	3.99964	6.34391e-05	0.00447375
BOD1	64.002	1.13402	0.283872	3.99483	6.47398e-05	0.00451047
RPL15P2	8.08341	0.944111	0.236316	3.99512	6.46612e-05	0.00451047
KCNN4	92.9884	-1.20047	0.300498	-3.99493	6.47126e-05	0.00451047
RMI1	85.4409	1.08125	0.270746	3.9936	6.50769e-05	0.00451512
C14orf2	140.688	1.00542	0.251814	3.99269	6.53272e-05	0.00451512
RP11-384K6.6	27.8067	-1.48112	0.371287	-3.98915	6.63111e-05	0.0045206
SNRPEP2	18.5032	1.06455	0.266833	3.98958	6.61907e-05	0.0045206
ERP29	186.563	0.727939	0.182474	3.98928	6.62752e-05	0.0045206
TPT1	12440.7	0.742416	0.186136	3.98856	6.6475e-05	0.0045206
TIMM50	60.3367	1.36359	0.341947	3.98773	6.67093e-05	0.0045206
ITGA11	58.6591	-1.43138	0.359212	-3.98477	6.75445e-05	0.00455938
COX7CP1	126.669	0.846659	0.212661	3.98126	6.85503e-05	0.00460934
PODXL	860.421	-1.07342	0.269745	-3.97939	6.90928e-05	0.00462788
SLC25A36	443.106	-0.690615	0.173602	-3.97815	6.94536e-05	0.00463416
KIAA1671	703.125	-0.753454	0.189594	-3.97404	7.0663e-05	0.00469679
RPL13P12	267.292	0.909588	0.228964	3.97262	7.10862e-05	0.00470688
ARHGAP21	1121.43	-0.659514	0.166118	-3.97016	7.1824e-05	0.00471971
RP11-347C12.2	10.9177	-1.27907	0.322156	-3.97034	7.1771e-05	0.00471971
SULF1	471.883	-1.10171	0.278132	-3.96112	7.46005e-05	0.00488366
RP11-165P7.1	11.5247	-1.66753	0.421196	-3.95903	7.52535e-05	0.00489228
RP11-244J10.1	22.0666	0.999626	0.252501	3.9589	7.52961e-05	0.00489228
CYCS	761.558	0.791881	0.200344	3.9526	7.73054e-05	0.00500409
AC007038.7	33.8602	-1.29664	0.328277	-3.94984	7.8202e-05	0.00503069
CTNND1	3606.27	-0.501171	0.126893	-3.94956	7.82964e-05	0.00503069
RNU6-26P	15.2231	-1.70375	0.431883	-3.94494	7.98203e-05	0.00510785
RP11-34P1.2	32.8675	0.9327	0.23653	3.94326	8.03806e-05	0.00510785
GNB2L1	1269.88	0.811406	0.205737	3.9439	8.01658e-05	0.00510785
HAX1	100.995	1.01177	0.256706	3.94137	8.10174e-05	0.00512952
COL12A1	992.653	-0.997	0.253029	-3.94026	8.13947e-05	0.00513467
RPS20P10	72.2199	0.840015	0.213272	3.93871	8.19212e-05	0.00514869
COL10A1	152.674	-1.05301	0.267465	-3.937	8.25072e-05	0.00514869
RPS15AP38	103.364	0.892621	0.22671	3.93727	8.24127e-05	0.00514869
XPOT	238.015	0.766528	0.194788	3.9352	8.31266e-05	0.00516875
ZBTB8OSP1	3.34599	-1.73523	0.441346	-3.93168	8.4353e-05	0.00522627
PSMA2	326.007	0.776969	0.197716	3.92972	8.50451e-05	0.0052504
C9orf84	14.4627	-1.36235	0.346794	-3.92841	8.55096e-05	0.00526035
Y_RNA	164.344	-0.776985	0.198029	-3.9236	8.72359e-05	0.00534759
RPL29	200.444	0.848216	0.216383	3.91996	8.85621e-05	0.00539079
CORIN	14.1194	-1.65328	0.421702	-3.9205	8.8365e-05	0.00539079
VCAN	3769.98	-1.02009	0.260717	-3.91263	9.12982e-05	0.00551861
RPL36	253.475	0.778292	0.198918	3.91263	9.12954e-05	0.00551861
RPL18AP3	686.071	0.891301	0.228305	3.904	9.46166e-05	0.00569934
HIST2H2AB	31.1876	1.22052	0.313272	3.89605	9.77749e-05	0.0058692
CCT7	168.77	0.716546	0.183969	3.89494	9.82235e-05	0.0058758
RP11-849F2.10	6.62741	1.18055	0.303256	3.8929	9.90524e-05	0.00590502
TPT1P9	2186.63	0.859928	0.221238	3.88689	0.000101537	0.00603238
snoU13	79.3451	-0.969746	0.249681	-3.88395	0.000102775	0.0060783
NDUFS1	544.112	0.574235	0.147901	3.88256	0.000103361	0.0060783
UGGT2	200.072	-0.903613	0.232719	-3.88285	0.000103238	0.0060783
ZNF280D	672.068	-0.651146	0.167806	-3.88034	0.000104311	0.00611346
ITGB6	2504.57	-0.950063	0.245003	-3.87776	0.000105421	0.00614501
LTBP2	159.59	-1.10529	0.285056	-3.87745	0.000105558	0.00614501
ANKRD36	127.155	-0.924809	0.238608	-3.87585	0.000106253	0.00616478
RAN	565.262	0.676982	0.174743	3.87415	0.000106996	0.00616667
CMC2	92.5847	0.891566	0.230121	3.87434	0.000106914	0.00616667
MYO1E	392.508	-0.672703	0.173884	-3.86869	0.000109422	0.00628562
RPS17L	20.741	1.17116	0.302839	3.86726	0.000110064	0.00630163
RPS15	816.379	0.831839	0.215583	3.85855	0.000114062	0.00650902
RPLP2	1765.88	0.714191	0.185237	3.85555	0.00011547	0.00656778
GLUD1	813.34	0.56661	0.147154	3.85047	0.000117894	0.00668371
GYLTL1B	15.5069	1.67608	0.436275	3.84181	0.000122132	0.00690146
RPS7P10	89.7932	0.8461	0.220917	3.82994	0.000128173	0.00721932
RP11-159H10.3	3.95175	1.66565	0.435359	3.82593	0.000130279	0.00731416
COL8A1	84.7671	-1.24733	0.326411	-3.82134	0.000132728	0.007395
SSR4	315.601	0.82115	0.214845	3.82206	0.00013234	0.007395
VMP1	4657.12	-0.718273	0.187988	-3.82084	0.000132997	0.007395
AC005062.2	29.3166	-1.37876	0.361309	-3.81602	0.000135621	0.00751677
ANKRD36B	46.1423	-1.02393	0.268515	-3.81331	0.000137119	0.00756767
EIF4ENIF1	128.966	-0.76815	0.201467	-3.81278	0.000137412	0.00756767
CCDC122	33.01	-0.996808	0.261507	-3.81179	0.000137964	0.00757405
RPA3	38.4167	1.14172	0.299646	3.81023	0.000138837	0.00759795
GFPT2	9.98015	-1.61513	0.424096	-3.80841	0.000139865	0.00763013
KMT2E	1446.23	-0.565845	0.148781	-3.80319	0.000142843	0.00776814
MTND5P26	11.0251	-1.38869	0.365452	-3.79992	0.000144745	0.007847
RP6-99M1.3	13.4998	-1.39327	0.366968	-3.79672	0.000146625	0.00791462
CDC42BPB	434.718	-0.692769	0.182488	-3.79624	0.000146905	0.00791462
CTC-507E2.1	16.2391	-1.61158	0.425261	-3.78962	0.000150876	0.00810337
NME2P1	50.5179	0.917129	0.242094	3.78832	0.000151672	0.00812099
AC138123.2	6.07253	1.168	0.30842	3.78703	0.000152459	0.00813803
AMDHD1	2.74162	1.62359	0.429245	3.78243	0.000155303	0.00823914
ANKRD20A5P	29.533	-1.41324	0.373563	-3.78314	0.000154863	0.00823914
RP11-478C6.4	59.3382	0.829308	0.219617	3.77615	0.000159272	0.0083729
RP11-700P18.1	27.8441	1.03975	0.275325	3.77644	0.000159087	0.0083729
TJP2	493.31	-0.584566	0.154798	-3.77631	0.00015917	0.0083729
TNRC6A	246.788	-0.717409	0.190069	-3.77446	0.000160357	0.00840443
PDRG1	10.6885	1.39412	0.369847	3.76945	0.00016361	0.00854914
RPS3AP26	110.258	0.929767	0.246819	3.767	0.000165222	0.00860745
LYST	551.298	-0.706312	0.187709	-3.76281	0.000168013	0.00868516
RP11-889L3.1	475.272	0.738841	0.196369	3.76251	0.000168216	0.00868516
RP11-488C13.1	95.6544	0.840736	0.223391	3.76352	0.000167539	0.00868516
DDX39A	58.9108	1.13124	0.300872	3.75986	0.000170012	0.00875182
CTB-63M22.1	117.496	0.816616	0.21724	3.75905	0.000170557	0.00875393
RPS6	1912.94	0.774568	0.206436	3.7521	0.000175357	0.00897372
RPL35P2	30.6745	1.00988	0.269845	3.74242	0.000182253	0.00928197
AP001372.2	15.7851	1.29578	0.346267	3.74215	0.000182451	0.00928197
PAQR6	6.58168	1.64061	0.438553	3.74095	0.000183323	0.00929909
SULF2	607.025	-0.924156	0.247122	-3.73968	0.000184257	0.00931923
RPS14P3	14.6392	1.00933	0.270654	3.72921	0.000192084	0.00954806
HRSP12	85.8437	1.07782	0.288857	3.73134	0.000190461	0.00954806
RP11-255N24.4	7.97896	1.17777	0.315811	3.72934	0.000191979	0.00954806
MMP3	90.0252	-1.42663	0.382463	-3.73011	0.000191395	0.00954806
GPR183	46.0423	-1.2598	0.337756	-3.72992	0.000191541	0.00954806
RP11-796G6.1	19.7714	0.897188	0.240562	3.72955	0.000191825	0.00954806
RP4-604A21.1	10.0875	1.13058	0.303377	3.72664	0.000194047	0.00956342
COX8A	70.3537	0.840765	0.225542	3.72776	0.000193189	0.00956342
DCTPP1	52.5054	0.960331	0.257665	3.72705	0.000193733	0.00956342
EEF1D	118.913	0.836036	0.22463	3.72183	0.000197784	0.00971999
RP11-475C16.1	158.526	0.880336	0.236631	3.7203	0.00019899	0.00972416
CDC37	253.181	-0.670976	0.180331	-3.7208	0.00019859	0.00972416
TMEM201	19.9108	1.49315	0.4017	3.71708	0.000201535	0.00982086
DCUN1D5	76.5517	-1.02947	0.277086	-3.71536	0.000202917	0.00983298
PPP1CC	974.577	0.665766	0.17919	3.71542	0.000202868	0.00983298
OST4	365.904	0.637565	0.171731	3.71258	0.000205154	0.00988616
APOO	30.9051	1.23605	0.332889	3.71311	0.000204731	0.00988616
RP1-182O16.1	27.362	0.884566	0.238475	3.70925	0.00020787	0.0099637
PLEKHA7	201.704	-0.936359	0.252442	-3.7092	0.000207912	0.0099637
HADHA	544.074	0.491132	0.132445	3.70818	0.000208752	0.00997639
ST14	770.487	-0.620816	0.167951	-3.6964	0.000218676	0.010422
MACF1	1789.75	-0.521529	0.141211	-3.69325	0.000221403	0.0104945
RP11-745A24.1	9.66536	-1.42762	0.386616	-3.6926	0.000221969	0.0104945
RP11-464D20.2	12.3554	0.971979	0.263227	3.69255	0.000222012	0.0104945
FBLN1	48.3	-1.29228	0.350335	-3.68869	0.000225413	0.0106263
WSB1	526.557	-0.65872	0.178667	-3.68687	0.000227031	0.0106735
EIF3M	338.742	0.690899	0.187471	3.68537	0.000228375	0.0107077
EHBP1	576.135	-0.61102	0.165939	-3.6822	0.000231232	0.0107834
IRF3	26.6586	1.17636	0.319468	3.68223	0.000231205	0.0107834
PARP8	431.357	-0.747958	0.203211	-3.6807	0.000232595	0.0107952
RPL21P119	2.70347	1.27607	0.346707	3.68055	0.00023273	0.0107952
RP4-706A16.3	26.8415	0.998823	0.271618	3.6773	0.000235711	0.0108465
CTAGE3P	4.28544	1.59498	0.433731	3.67735	0.000235669	0.0108465
RPL7AP6	335.291	0.820189	0.223035	3.6774	0.000235622	0.0108465
YEATS2	208.945	-0.706308	0.192244	-3.67401	0.000238774	0.0109583
CTD-2287O16.1	345.722	0.721712	0.196635	3.67031	0.000242261	0.011089
RNA5SP450	17.8963	-1.32354	0.360932	-3.66701	0.000245402	0.0112032
RP11-347P5.1	25.5465	-1.16298	0.317317	-3.66503	0.000247306	0.0112605
COL3A1	1752.55	-0.941501	0.257047	-3.66276	0.00024951	0.0113037
TMX4	366.661	0.889727	0.242915	3.66271	0.000249558	0.0113037
HNRNPR	541.083	-0.462208	0.126366	-3.6577	0.000254492	0.0114972
RP11-632C17__A.1	71.8846	0.942166	0.25784	3.65408	0.00025811	0.0116003
IQGAP1	3901.55	-0.420134	0.114974	-3.65416	0.000258025	0.0116003
CCDC82	242.331	-0.78484	0.214861	-3.65278	0.000259417	0.0116288
HINT1	349.639	0.756032	0.207113	3.65034	0.000261897	0.011693
SMIM19	69.8755	1.19164	0.326587	3.64877	0.000263502	0.011693
SNORA70G	8.55228	-1.47836	0.405029	-3.65001	0.000262225	0.011693
POMP	389.094	0.76661	0.210103	3.64873	0.000263544	0.011693
CASC19	16.4714	-1.44193	0.395439	-3.6464	0.000265945	0.0117694
AGFG1	1002.46	-0.535178	0.14685	-3.64438	0.00026804	0.0118319
GPR68	4.15368	-1.60774	0.441258	-3.64353	0.000268921	0.0118407
NDUFB3	103.091	0.854314	0.234643	3.64091	0.000271673	0.0119305
MT-TP	254.849	0.774827	0.212848	3.64029	0.000272335	0.0119305
RP11-146N23.1	12.5287	1.1059	0.303859	3.63951	0.000273161	0.0119365
AC013394.2	92.8475	-0.88801	0.244271	-3.63535	0.000277609	0.0121004
RP11-70L8.4	9.92166	-1.59719	0.439561	-3.6336	0.00027949	0.0121519
MYH11	98.0942	-1.40288	0.386164	-3.63287	0.000280286	0.012156
RPL35AP21	19.9787	0.955507	0.263137	3.63121	0.000282094	0.0121767
SVIL	228.72	-0.770862	0.212292	-3.63115	0.000282166	0.0121767
RPS12	581.161	0.773651	0.213539	3.62299	0.000291216	0.012536
ANKRD36C	999.809	-1.15857	0.319966	-3.62093	0.000293547	0.0126051
PPP1R18	104.896	-1.0865	0.30025	-3.61865	0.000296145	0.0126853
AC008277.1	15.506	-1.2018	0.332503	-3.61441	0.000301031	0.0128328
ARHGAP32	1087.3	-0.610009	0.168802	-3.61376	0.000301789	0.0128328
RPLP1	763	0.762693	0.211054	3.61374	0.00030181	0.0128328
CTD-2192J16.15	195.036	0.73954	0.204755	3.61183	0.000304044	0.0128962
NDUFB1	49.2738	0.93798	0.259946	3.60837	0.000308126	0.0130375
CDC42BPA	1957.38	-0.537999	0.149326	-3.60284	0.00031476	0.0132545
SLC30A4	88.515	-1.08501	0.301156	-3.60282	0.000314784	0.0132545
SLC27A3	18.2001	-1.46259	0.406413	-3.59878	0.000319718	0.0133038
RPL14	473.15	0.711151	0.197619	3.59859	0.000319947	0.0133038
RP11-460N11.3	68.9897	-1.46801	0.407912	-3.59885	0.000319627	0.0133038
RP11-170M17.2	37.7404	0.739824	0.205501	3.60009	0.000318106	0.0133038
RP1-145M24.1	30.2924	-1.36695	0.379908	-3.5981	0.000320554	0.0133038
HERC2P2	25.1516	-1.19078	0.330724	-3.60052	0.000317578	0.0133038
LUM	1169.44	-0.818231	0.227586	-3.59526	0.000324072	0.0134176
CCDC85B	4.65062	1.32363	0.368736	3.58964	0.000331133	0.0136774
CLASP1	583.973	-0.609128	0.169792	-3.5875	0.00033386	0.0137021
ATP5J2	73.9979	0.739934	0.206195	3.58852	0.000332567	0.0137021
IDI1	373.638	0.840808	0.234384	3.58731	0.000334102	0.0137021
AC010468.1	37.5086	0.947402	0.264286	3.58476	0.000337387	0.0138042
RPS20P14	90.5069	0.746319	0.208354	3.58198	0.000340995	0.013919
C3orf33	17.9722	1.23017	0.343929	3.57682	0.000347796	0.0141633
TMCC1	346.479	-0.600562	0.168059	-3.57351	0.000352226	0.0142767
FNDC3B	1263.78	-0.535983	0.149987	-3.57353	0.000352206	0.0142767
SRSF9	246.082	0.624981	0.175361	3.56396	0.000365297	0.0146018
CTD-2002H8.2	5.58383	-1.51966	0.426258	-3.56511	0.000363701	0.0146018
HSPE1P2	64.3893	0.793008	0.222375	3.56608	0.000362359	0.0146018
RPL41P2	8.94586	0.950494	0.266685	3.56411	0.000365091	0.0146018
RP11-265N6.3	7.84501	-1.17139	0.328579	-3.565	0.000363849	0.0146018
RPL39P38	2.69893	1.20456	0.337827	3.56561	0.000363007	0.0146018
FOXD2	7.91832	1.52755	0.428797	3.56242	0.000367448	0.014654
HHIP	29.1424	-1.37529	0.386216	-3.56094	0.000369523	0.0147029
RP11-556K13.1	11.7601	0.976496	0.274332	3.55954	0.000371502	0.0147446
SEPT7P6	34.5149	-0.810611	0.227764	-3.559	0.000372271	0.0147446
RBM39	1052.06	-0.484986	0.136336	-3.55728	0.000374709	0.0148074
C6orf48	149.777	1.02531	0.288386	3.55534	0.000377484	0.0148494
MIR221	1.36893	-1.567	0.440728	-3.55548	0.000377286	0.0148494
PSMD4	96.978	0.69223	0.194898	3.55175	0.000382681	0.0149538
H2AFZ	539.788	0.705714	0.198672	3.55216	0.000382088	0.0149538
RAB30-AS1	14.9851	1.34661	0.379142	3.55172	0.000382724	0.0149538
HSPE1	163.899	0.797929	0.224775	3.5499	0.000385373	0.0150225
GPR115	37.426	-1.39619	0.393367	-3.54933	0.000386213	0.0150225
TAS2R46	16.9756	-1.5368	0.433494	-3.54514	0.0003924	0.015229
UHRF2	113.31	-0.80333	0.226645	-3.54444	0.000393446	0.0152355
LINC00630	28.4399	-1.24795	0.352265	-3.54264	0.000396141	0.0153057
RPL7AP31	13.614	0.966053	0.272768	3.54167	0.000397607	0.0153282
RP11-299L17.1	2.92816	1.24799	0.352465	3.54076	0.000398984	0.0153472
BOD1L1	880.5	-0.576289	0.162786	-3.54017	0.000399875	0.0153474
ATP5J	255.968	0.635212	0.179722	3.53442	0.000408676	0.0156506
CDH11	142.328	-0.963866	0.272882	-3.53217	0.000412164	0.0157494
CCDC14	337.912	-0.693225	0.196328	-3.53096	0.000414062	0.0157637
RPL21P120	1.78393	1.28546	0.364074	3.53077	0.000414357	0.0157637
UACA	1425.74	-0.658325	0.186487	-3.53013	0.000415352	0.015767
UST	51.4826	1.1494	0.325672	3.52932	0.000416623	0.0157807
FLNB	2316.82	-0.706753	0.200485	-3.52521	0.000423147	0.0159929
CD109	386.206	-1.08723	0.30853	-3.52389	0.000425258	0.0160378
ZNF680	118.134	-0.832898	0.236468	-3.52224	0.000427924	0.0161033
RPL5	1123.22	0.700567	0.198986	3.52069	0.000430433	0.0161277
RPL24	510.603	0.687762	0.19533	3.52103	0.000429878	0.0161277
PSMB4	422.481	0.574508	0.163416	3.51561	0.000438739	0.0163088
COX7B	197.83	0.722135	0.205484	3.51431	0.000440905	0.0163088
MMP13	120.829	-1.28647	0.365776	-3.5171	0.000436285	0.0163088
ARID2	603.295	-0.568779	0.161846	-3.51432	0.000440887	0.0163088
ZC3H13	860.774	-0.749458	0.213192	-3.51541	0.000439069	0.0163088
CHD2	968.479	-0.56289	0.160096	-3.51596	0.000438173	0.0163088
COL5A1	210.013	-1.04999	0.299	-3.51168	0.000445283	0.016416
UBR1	358.264	-0.60453	0.172161	-3.51143	0.000445696	0.016416
COL5A2	239.726	-0.980708	0.2794	-3.51006	0.000448013	0.0164316
CCT2	409.926	0.593697	0.169132	3.51025	0.000447679	0.0164316
CTD-2528L19.6	10.2575	-1.40812	0.401372	-3.50828	0.000451021	0.016507
RASA1	449.533	-0.757456	0.216243	-3.5028	0.000460398	0.016635
GRPEL2	155.089	0.822893	0.234907	3.50306	0.00045995	0.016635
FAM83B	475.368	-0.60194	0.171858	-3.50255	0.000460824	0.016635
COPS6	142.309	0.849576	0.242391	3.50499	0.000456633	0.016635
RP11-864N7.2	685.328	0.758081	0.21634	3.50412	0.000458122	0.016635
KMT2A	1443.83	-0.581983	0.166172	-3.50229	0.000461281	0.016635
ZFC3H1	718	-0.645314	0.184154	-3.5042	0.000457986	0.016635
PLAUR	466.191	-0.894256	0.255373	-3.50176	0.000462189	0.016635
RP11-282K24.3	70.7016	-1.21696	0.348149	-3.4955	0.000473166	0.0169844
UBAP1L	1.28856	1.50624	0.431025	3.49457	0.000474834	0.0169844
ZNF432	69.7128	-1.02632	0.293688	-3.4946	0.000474776	0.0169844
AC007969.5	291.724	0.764912	0.218997	3.49279	0.000478	0.0170624
MYCBP2	836.212	-0.497508	0.142485	-3.49165	0.000480047	0.0171003
CTC-459M5.2	14.271	-1.5372	0.441329	-3.48313	0.000495594	0.0176084
DMTF1	422.264	-0.633538	0.181937	-3.48218	0.000497356	0.0176084
RPS3AP47	25.8967	0.834155	0.23952	3.48262	0.000496538	0.0176084
MRPL44	49.811	0.890544	0.255821	3.48112	0.000499329	0.0176423
ANGPTL1	53.0772	-1.07222	0.308059	-3.48057	0.000500355	0.0176426
LBH	20.0481	-1.27478	0.366423	-3.479	0.000503287	0.01771
ITSN2	813.551	-0.470884	0.135429	-3.47699	0.000507078	0.0178073
LRRC16A	592.804	-0.562351	0.161851	-3.4745	0.000511813	0.0179372
RP11-23F23.3	9.31546	-1.07984	0.311117	-3.47085	0.000518821	0.0181097
HERC1	263.444	-0.607226	0.174944	-3.47098	0.000518561	0.0181097
C1orf43	542.163	0.673039	0.194019	3.46893	0.000522541	0.0181684
SNHG8	35.2657	1.19398	0.344196	3.4689	0.000522599	0.0181684
MUC4	2018.35	-1.30293	0.376393	-3.46163	0.000536922	0.018629
ANTXR1	487.944	-0.89903	0.259776	-3.46079	0.000538587	0.0186495
WNT7A	32.0221	-1.46845	0.424757	-3.45714	0.000545938	0.0188664
SETD1A	57.7923	-1.03582	0.299756	-3.45554	0.000549201	0.0189414
ZBTB9	44.2186	-1.32769	0.384754	-3.45074	0.000559051	0.0192048
RP11-38M8.1	3.10444	1.50676	0.436637	3.45083	0.000558861	0.0192048
C4orf19	79.5885	0.831828	0.241312	3.44711	0.000566622	0.0194264
MRPL51	293.992	0.720724	0.209133	3.44625	0.000568424	0.0194497
PPIG	1178.01	-0.480431	0.139483	-3.44436	0.000572409	0.0195091
RP11-183C12.1	9.48006	1.08655	0.315444	3.44452	0.000572083	0.0195091
RPS8	1265.76	0.703349	0.204271	3.44321	0.000574851	0.0195539
KIAA0247	354.95	-0.598918	0.174028	-3.44151	0.000578477	0.0196388
POLR2I	13.3708	1.17508	0.341497	3.44097	0.00057963	0.0196395
LOXL2	28.1692	-1.30042	0.378166	-3.43876	0.000584384	0.0196845
LAPTM4B	881.657	0.6509	0.189312	3.43824	0.000585498	0.0196845
LDHB	275.346	1.30742	0.380211	3.43868	0.000584557	0.0196845
EEF1DP1	19.6128	0.782244	0.227441	3.43933	0.000583153	0.0196845
RP11-166O4.6	6.06202	-1.44335	0.419896	-3.4374	0.000587326	0.0197078
RPL15	1438.22	0.629547	0.183265	3.43516	0.000592194	0.0197888
U47924.27	1.78889	1.51586	0.441319	3.43485	0.000592891	0.0197888
BRMS1L	27.3305	1.22982	0.358055	3.43472	0.000593163	0.0197888
COLEC12	13.6647	-1.4243	0.414765	-3.434	0.000594738	0.0198033
NEMF	770.756	-0.453637	0.132133	-3.43317	0.00059656	0.0198259
RPL31P63	40.4243	0.781763	0.227817	3.43153	0.000600184	0.0199082
EIF2S3	725.264	0.517388	0.150847	3.42988	0.00060384	0.0199912
ATXN1	237.184	-0.769215	0.224854	-3.42095	0.000624033	0.0206204
RP11-406H23.2	0.825005	-1.50851	0.441056	-3.42023	0.000625692	0.0206359
SESTD1	773.103	-0.625809	0.183096	-3.41792	0.000631018	0.0206936
LRCH3	225.648	-0.551479	0.161321	-3.41851	0.000629641	0.0206936
RPL10P3	11.875	0.924379	0.270411	3.41842	0.000629865	0.0206936
MAF	73.9727	-1.14868	0.336217	-3.4165	0.000634317	0.0207625
ZDHHC21	258.739	-0.605931	0.177425	-3.41514	0.000637481	0.0208268
ANKUB1	10.3693	-1.42229	0.41717	-3.40937	0.000651139	0.0211547
UTRN	935.676	-0.60264	0.176761	-3.40935	0.000651176	0.0211547
MKL1	132.69	-0.959819	0.281458	-3.41017	0.000649221	0.0211547
RP11-20O24.4	21.9647	0.950651	0.279076	3.40642	0.000658207	0.0212636
TMEM5	41.1196	0.957027	0.280924	3.40671	0.000657513	0.0212636
CTD-2258A20.3	4.41225	-1.47791	0.433814	-3.40678	0.000657352	0.0212636
TPD52	568.482	0.761937	0.223775	3.40492	0.000661828	0.0213013
RPL27A	360.575	0.633757	0.186113	3.40523	0.000661079	0.0213013
THAP5	139.74	0.534932	0.157142	3.40413	0.000663757	0.0213238
C6	75.5304	-1.50029	0.440986	-3.40213	0.000668639	0.0214409
AC016739.2	478.722	0.81526	0.239751	3.40044	0.000672765	0.0214543
WDFY3	661.057	-0.439044	0.129113	-3.40047	0.000672711	0.0214543
ITPR3	448.813	-0.703345	0.206793	-3.4012	0.000670915	0.0214543
PNPT1P1	9.62276	-1.31276	0.386435	-3.3971	0.000681052	0.0216787
AC131971.1	12.7426	-1.35823	0.400099	-3.39474	0.000686944	0.0217863
FGF7	13.9643	-1.44083	0.424376	-3.39518	0.000685835	0.0217863
C9orf16	39.16	1.0722	0.316097	3.39199	0.00069388	0.0219661
CCDC50	488.177	-0.739567	0.218076	-3.39132	0.000695562	0.0219793
C20orf27	7.01568	1.37507	0.405729	3.38913	0.000701143	0.0221153
COG5	303.423	-0.543861	0.160502	-3.38849	0.000702783	0.0221268
GPR18	40.1298	-1.20583	0.355986	-3.38729	0.000705862	0.0221835
ACTR3C	57.4757	-1.01773	0.300696	-3.38458	0.000712862	0.022363
THRAP3	588.747	-0.407671	0.120541	-3.38201	0.000719565	0.0223813
CTC-575D19.1	167.058	0.763959	0.225874	3.38224	0.000718974	0.0223813
OGT	670.017	-0.571403	0.168868	-3.38373	0.000715083	0.0223813
RP11-832N8.1	6.0654	0.894578	0.264417	3.38321	0.000716426	0.0223813
HSPE1P3	49.2447	0.791946	0.234188	3.38167	0.000720466	0.0223813
STRADA	6.97875	-1.36016	0.402248	-3.3814	0.000721186	0.0223813
PLEKHM1P	63.7458	-1.19048	0.352245	-3.37969	0.000725673	0.0224803
LRPPRC	802.28	0.576282	0.170563	3.37871	0.000728274	0.0225207
CHCHD2	205.339	0.608637	0.180228	3.37705	0.000732689	0.0226169
AFF3	7.01476	1.48851	0.441041	3.37499	0.000738178	0.0226856
RARB	75.2587	-1.18271	0.35051	-3.37426	0.000740146	0.0226856
NPM1P29	5.59722	-1.48006	0.438479	-3.37544	0.000736988	0.0226856
ZNF32	11.8406	1.2657	0.375069	3.37459	0.000739263	0.0226856
AC022431.1	405.19	0.779639	0.231146	3.37293	0.000743729	0.0227552
MIR3916	143.694	-0.930406	0.276062	-3.37028	0.000750919	0.0229348
ODF2L	217.234	-0.764657	0.227053	-3.36775	0.000757838	0.0230649
ZNF667-AS1	11.5152	-1.45354	0.431601	-3.36779	0.000757723	0.0230649
TMCO3	209.033	-0.629159	0.186876	-3.36672	0.000760689	0.0231111
CD44	4418.21	-0.642737	0.190953	-3.36595	0.000762794	0.0231345
LAMA2	90.7781	-1.03479	0.307618	-3.3639	0.000768507	0.0232671
CBX3	672.579	0.583839	0.173647	3.36222	0.000773177	0.023354
FAM188B	20.0121	-1.29679	0.385732	-3.3619	0.000774068	0.023354
AC004453.8	269.973	0.755403	0.224871	3.35928	0.000781466	0.0234955
KITLG	383.331	0.906795	0.269923	3.35946	0.00078094	0.0234955
TET2	662.714	-0.602387	0.179478	-3.35633	0.00078985	0.0237064
PIBF1	324.291	-0.602704	0.179606	-3.35571	0.000791616	0.0237184
CHIC2	72.0926	-0.756791	0.22561	-3.35442	0.000795324	0.0237884
AREG	9.15993	-1.30482	0.389114	-3.3533	0.000798535	0.0238433
VEGFA	580.494	-0.79238	0.236336	-3.35278	0.000800053	0.0238476
LINC00998	106.495	0.741817	0.221354	3.35127	0.000804428	0.023911
RPS29P22	6.42256	-1.4598	0.43562	-3.35109	0.000804934	0.023911
PRRG1	163.549	-0.792897	0.236707	-3.3497	0.000808996	0.0239905
RP11-36C20.1	274.3	0.768816	0.229642	3.34789	0.00081428	0.0240649
RP11-574K11.29	6.75264	-1.46424	0.437342	-3.34805	0.000813823	0.0240649
RP11-522L3.4	3.93186	-1.46887	0.439096	-3.34521	0.000822202	0.0242578
UNC50	91.1913	0.819232	0.245232	3.34064	0.000835843	0.0246183
IL17RE	35.7245	-1.19707	0.358529	-3.33883	0.000841313	0.0246956
IPMK	105.337	0.725601	0.217317	3.33891	0.000841082	0.0246956
RP4-575N6.2	24.9129	0.878034	0.263126	3.33693	0.000847096	0.02482
HIVEP2	397.465	-0.684328	0.205104	-3.3365	0.000848413	0.02482
RP11-298J20.3	6.62804	-1.47148	0.441344	-3.33409	0.000855781	0.0249821
AP000936.1	18.8994	0.840861	0.252227	3.33375	0.000856835	0.0249821
SUMO2	110.79	0.664568	0.19939	3.333	0.000859139	0.0250073
SUCLA2	99.9139	0.82097	0.246356	3.33245	0.000860854	0.0250152
RPL24P4	286.477	0.747843	0.224618	3.3294	0.000870345	0.0252487
RP11-787I22.3	1.31557	-1.45782	0.438221	-3.32668	0.000878883	0.0254539
TECPR2	64.6355	-1.00409	0.302047	-3.32427	0.000886504	0.0255572
GREM1	193.095	-1.02387	0.30801	-3.32415	0.000886872	0.0255572
RPS11	2975.03	0.553215	0.166385	3.3249	0.000884506	0.0255572
MDH2	529.697	0.635365	0.191221	3.32268	0.000891565	0.0256155
ZNF765	193.843	-0.758428	0.228296	-3.32213	0.000893323	0.0256155
SMDT1	55.2381	0.884902	0.266349	3.32233	0.000892676	0.0256155
MPRIPP1	11.8242	-1.18531	0.356932	-3.32084	0.000897475	0.0256921
PHF7	3.70139	1.45947	0.439867	3.31798	0.00090672	0.0257437
RP11-372E1.1	8.51276	0.963033	0.290231	3.31816	0.000906117	0.0257437
TBL2	109.3	0.732417	0.220656	3.31928	0.000902505	0.0257437
CBWD5	37.9229	-0.893516	0.269332	-3.31753	0.000908183	0.0257437
COA4	102.452	0.668481	0.2014	3.31918	0.000902831	0.0257437
RP11-23N2.4	11.2446	-1.29853	0.391323	-3.31831	0.000905626	0.0257437
LAMC2	2728.82	-0.70844	0.213681	-3.31541	0.000915074	0.0257796
PSMA6P2	20.3414	0.815927	0.246108	3.31532	0.000915393	0.0257796
POSTN	585.958	-0.994767	0.300019	-3.31568	0.000914197	0.0257796
PIAS1	645.37	-0.50467	0.152176	-3.31635	0.000912013	0.0257796
RP11-10L12.2	4.57332	-1.36832	0.412943	-3.31359	0.000921081	0.0258977
PTPN12	1472.25	-0.481483	0.145345	-3.31268	0.000924058	0.0259151
RPL14P1	415.124	0.752907	0.227293	3.31249	0.000924685	0.0259151
PKM	2300.09	-0.544683	0.164498	-3.31117	0.000929061	0.0259957
RPL32	482.681	0.673999	0.203666	3.30933	0.000935188	0.026083
LAMTOR4	45.0259	1.01426	0.30645	3.3097	0.000933974	0.026083
REEP1	69.2878	-1.34516	0.406625	-3.30812	0.000939253	0.0261543
CAPRIN2	264.915	-0.957086	0.289384	-3.30732	0.000941926	0.0261867
DAB2	301.715	-0.859368	0.259875	-3.30685	0.00094352	0.0261891
SLC19A1	12.8777	1.22716	0.371706	3.30141	0.000961993	0.0266592
TXN	689.707	0.66582	0.201753	3.30018	0.000966227	0.0267338
STAMBP	200.15	-0.623928	0.189134	-3.29886	0.000970775	0.0268169
HAT1	304.509	0.592717	0.179727	3.29787	0.000974221	0.0268693
EIF1	565.344	0.574432	0.174217	3.29723	0.000976428	0.0268874
RP11-96C23.9	1.57972	-1.42685	0.433298	-3.293	0.000991233	0.0272518
THBS2	282.013	-0.91973	0.27948	-3.29086	0.000998799	0.0274164
DTYMK	35.6043	1.06488	0.323642	3.29031	0.00100075	0.0274267
RP6-42F4.1	21.4534	-1.01009	0.307418	-3.28572	0.00101722	0.0277902
CTD-3035D6.1	18.2609	0.773214	0.235308	3.28597	0.00101632	0.0277902
RP4-796I17.5	23.7101	0.851854	0.259376	3.28425	0.00102255	0.0278918
AC093818.1	26.9666	-1.21175	0.369043	-3.2835	0.00102526	0.027922
CFLAR	757.433	-0.526478	0.160374	-3.28281	0.00102779	0.0279468
FHL1	22.5798	-1.28781	0.392478	-3.28123	0.00103354	0.0280594
DNAJA1	844.016	0.63204	0.192844	3.27747	0.00104742	0.0283555
NFKBIB	15.5101	1.14472	0.34928	3.27739	0.00104772	0.0283555
SNORD39	7.03597	-1.43733	0.438757	-3.27591	0.00105321	0.0284596
ARMCX4	42.6022	-1.19895	0.366144	-3.27453	0.00105838	0.0285406
MMP11	62.537	-1.06148	0.324193	-3.27423	0.0010595	0.0285406
PGM5P1	6.15644	-1.3616	0.416017	-3.27295	0.00106431	0.0285815
JMJD1C	1689.24	-0.460998	0.140833	-3.27337	0.00106274	0.0285815
WHAMM	104.823	-0.747584	0.228545	-3.27105	0.00107149	0.0287299
ABHD2	4795.41	-0.747308	0.2286	-3.26906	0.00107905	0.0288879
RPL41P1	11.7848	0.834021	0.255241	3.26758	0.00108472	0.0289951
UBTD1	4.0085	-1.44085	0.441162	-3.26603	0.00109068	0.0291093
LNX1-AS1	6.7027	-1.42717	0.437267	-3.26384	0.00109912	0.0292447
RPL37P2	80.2254	0.681734	0.208872	3.26389	0.00109895	0.0292447
CTD-2262B20.1	7.68152	-1.44022	0.441349	-3.26322	0.00110155	0.0292644
RP11-305M3.2	9.95948	1.29803	0.397941	3.26187	0.00110678	0.0293128
ATF7IP	775.868	-0.47913	0.146907	-3.26145	0.00110844	0.0293128
N4BP2L2	581.192	-0.588853	0.180515	-3.26207	0.00110603	0.0293128
RP11-254B13.4	10.5617	-1.10863	0.340009	-3.2606	0.00111179	0.0293566
NUDT2	26.117	1.27373	0.390871	3.2587	0.00111922	0.029508
TANK	447.816	-0.57233	0.175726	-3.25694	0.00112621	0.0296472
NANOGP4	4.55008	-1.40666	0.432114	-3.25531	0.0011327	0.0296524
SIGMAR1	224.469	0.775609	0.23826	3.2553	0.00113271	0.0296524
ACIN1	208.711	-0.720775	0.221425	-3.25517	0.00113325	0.0296524
MRPL12	5.18295	1.28231	0.393859	3.25575	0.00113095	0.0296524
RPL24P8	294.859	0.71553	0.219863	3.25444	0.00113616	0.0296838
RP11-327O17.2	28.4337	-1.19694	0.367999	-3.25257	0.00114368	0.0298354
SDHD	141.413	0.740301	0.227678	3.25153	0.00114786	0.0298796
MRPS12	35.8056	1.02406	0.314969	3.25129	0.00114882	0.0298796
TMEM123	1464.98	0.559921	0.172343	3.24887	0.00115863	0.0300898
FZD2	7.61755	1.41276	0.435054	3.24732	0.00116496	0.030209
SUCLG1	115.545	0.646894	0.199277	3.24621	0.00116954	0.0302825
PRRC2C	4472.39	-0.561007	0.172946	-3.24382	0.00117937	0.0304913
TAS2R4	3.25732	-1.42881	0.44059	-3.24295	0.00118298	0.0305392
BNIP2	352.493	-0.645113	0.199116	-3.23988	0.00119581	0.0308245
XKR6	19.5917	-1.31832	0.407256	-3.23707	0.00120764	0.030989
GHITM	196.69	0.654202	0.202045	3.23791	0.00120411	0.030989
RPL13AP25	36.1408	0.681323	0.210478	3.23703	0.0012078	0.030989
THBS1	605.456	-0.920546	0.284411	-3.23667	0.00120934	0.030989
MPDZ	39.9581	-1.08557	0.335612	-3.23459	0.00121817	0.0311692
APTX	59.6485	1.03974	0.321542	3.2336	0.00122242	0.0312321
AEBP1	114.594	-1.00924	0.312393	-3.23069	0.0012349	0.0314593
RP11-12M9.3	94.8923	0.687661	0.212853	3.23068	0.00123494	0.0314593
RPL34P6	13.3291	0.791457	0.245314	3.2263	0.00125401	0.0317121
UBXN7	306.305	-0.520157	0.161213	-3.22652	0.00125305	0.0317121
UBQLN2	449.256	-0.647914	0.20076	-3.2273	0.00124964	0.0317121
GRHPR	55.5727	0.880766	0.27294	3.22696	0.00125111	0.0317121
CD59	1613.69	-0.596115	0.184685	-3.22774	0.00124773	0.0317121
MRPL9	49.2082	0.728958	0.226012	3.2253	0.00125839	0.0317766
DECR1	124.83	0.602738	0.187039	3.22253	0.00127062	0.0320389
MPZL1	921.874	0.487807	0.151429	3.22135	0.00127589	0.032125
CUL4A	390.202	-0.459267	0.1427	-3.21841	0.00128906	0.0323888
CTD-2547E10.2	46.9756	-0.971849	0.301988	-3.21817	0.0012901	0.0323888
SMG7	815.84	-0.449739	0.139842	-3.21605	0.00129968	0.0324415
AC093106.5	3.44763	1.06281	0.330388	3.21686	0.00129604	0.0324415
ASAH2B	18.7789	0.955957	0.297239	3.21612	0.00129936	0.0324415
HSPE1P4	33.0501	0.81019	0.2519	3.21631	0.0012985	0.0324415
ZNF185	202.309	-0.901745	0.280503	-3.21474	0.00130561	0.0325428
TUBA1B	681.045	0.521509	0.162298	3.21328	0.00131229	0.0326622
TFG	816.825	-0.492652	0.153352	-3.21255	0.00131564	0.0326987
MLPH	243.516	-0.754893	0.235014	-3.21212	0.00131761	0.0327009
THEM6	62.9106	0.948985	0.295678	3.20953	0.00132954	0.0329146
NDUFAB1	61.787	0.732067	0.228099	3.20942	0.00133002	0.0329146
FSTL1	471.958	-0.764483	0.238267	-3.20851	0.00133423	0.0329718
CCT3	311.461	0.549156	0.17145	3.20302	0.00135995	0.033493
CTD-2161E19.1	47.1901	0.644062	0.201146	3.20196	0.00136497	0.033493
HLA-F-AS1	20.5138	-1.34204	0.419026	-3.20277	0.00136111	0.033493
MMP14	233.354	-0.742909	0.231906	-3.2035	0.0013577	0.033493
RPS15A	107.92	0.827688	0.258475	3.20219	0.00136386	0.033493
AL353583.1	8.94725	-1.3068	0.40836	-3.20011	0.00137375	0.0336607
KCNQ4	10.7603	-1.40423	0.439322	-3.19636	0.00139173	0.0336934
MIR181A1HG	33.658	-1.22564	0.383103	-3.19923	0.00137794	0.0336934
RN7SKP25	10.9488	-1.24359	0.38898	-3.19706	0.00138837	0.0336934
COQ2	35.6959	1.02889	0.321817	3.19714	0.00138798	0.0336934
STOML2	134.772	0.800627	0.250361	3.19788	0.00138441	0.0336934
MTND4P15	1.88341	-1.40632	0.439647	-3.19875	0.00138024	0.0336934
PPA1	796.459	0.535301	0.167475	3.1963	0.001392	0.0336934
RALGAPA1	346.598	-0.615146	0.192462	-3.19619	0.00139256	0.0336934
AC090602.2	2.22476	1.17245	0.366778	3.19663	0.00139043	0.0336934
RPS23P8	469.686	0.65296	0.204367	3.19503	0.00139816	0.0337818
DGKA	130.782	-0.959881	0.30056	-3.19364	0.00140492	0.0338979
PLGRKT	48.586	0.895543	0.280499	3.19268	0.00140959	0.0339632
RPL21P75	4.93516	0.962519	0.301796	3.1893	0.00142618	0.0343153
UQCRB	338.214	0.579784	0.181926	3.18691	0.001438	0.0345054
NHP2P1	3.01763	1.15401	0.36211	3.1869	0.00143806	0.0345054
RP11-202D18.2	9.29872	-1.34134	0.421211	-3.18448	0.00145013	0.0347471
ARL16	10.4732	1.17403	0.368731	3.18398	0.00145265	0.0347593
ARHGAP31	72.7309	-0.974073	0.306036	-3.18287	0.00145823	0.0347791
RP11-39K24.4	11.6793	-1.38257	0.434308	-3.18339	0.00145563	0.0347791
RPL34P27	36.8557	0.738257	0.231965	3.18262	0.00145949	0.0347791
APOA1BP	129.924	0.775398	0.243761	3.18097	0.00146782	0.0348818
RP11-620J15.3	2.51189	1.40271	0.440916	3.18136	0.00146586	0.0348818
THG1L	25.8408	0.992929	0.312195	3.18048	0.00147031	0.0348932
P4HA3	7.39357	-1.37541	0.432552	-3.17975	0.00147401	0.0349333
MICALL1	39.333	-1.04524	0.329215	-3.17494	0.00149868	0.0354694
RPLP0P6	348.818	0.777121	0.244848	3.17389	0.00150413	0.0355498
LHFP	84.7836	-1.15777	0.364913	-3.17272	0.00151016	0.0356438
PCCA-AS1	8.32682	-1.36315	0.43013	-3.16917	0.00152874	0.0360334
KANSL1	470.308	-0.558697	0.176375	-3.16766	0.00153671	0.0361721
RPL7AP30	90.0161	0.683581	0.2159	3.1662	0.00154445	0.0362069
SMG1P1	12.0909	-1.04889	0.331271	-3.16625	0.0015442	0.0362069
AC026271.5	83.5755	0.710311	0.224312	3.16663	0.00154218	0.0362069
CCT4	190.986	0.740661	0.233996	3.16527	0.00154938	0.0362735
RN7SL815P	12.4064	-1.33578	0.42227	-3.16334	0.00155968	0.036284
SLC22A3	91.4965	-1.09867	0.347327	-3.16323	0.00156029	0.036284
ZNF195	267.521	-0.699971	0.221249	-3.16373	0.00155761	0.036284
ATP5EP2	43.4321	0.683651	0.21612	3.16329	0.00155996	0.036284
PMM2	82.2389	-0.770807	0.243656	-3.1635	0.00155885	0.036284
HNRNPU-AS1	90.1719	-0.877558	0.277528	-3.16205	0.00156665	0.0363831
CIR1	267.407	-0.533974	0.168946	-3.16062	0.00157436	0.0364919
CXorf23	178.898	-0.641971	0.20313	-3.1604	0.00157554	0.0364919
KTN1	3029.72	-0.446283	0.141289	-3.15865	0.00158503	0.0366629
VASN	28.2572	-1.24878	0.395579	-3.15685	0.00159485	0.0368409
SENP7	251.059	-0.61612	0.195313	-3.15453	0.00160758	0.0370854
SEC63P1	79.4596	-0.70277	0.223025	-3.15108	0.0016267	0.0371598
RP1-134E15.3	0.873	-1.33532	0.42363	-3.1521	0.00162101	0.0371598
RP5-1101C3.1	12.0508	-1.17055	0.37154	-3.15054	0.00162967	0.0371598
GNE	433.251	0.873979	0.277396	3.15065	0.00162906	0.0371598
INTS6	397.754	-0.578955	0.183768	-3.15047	0.00163008	0.0371598
FBN1	243.668	-0.906261	0.287655	-3.15052	0.00162981	0.0371598
APOOP5	2.47908	1.22241	0.387956	3.15091	0.00162764	0.0371598
ANKRD12	806.454	-0.528558	0.167721	-3.15142	0.00162477	0.0371598
ZNF512B	21.57	-1.23037	0.390521	-3.15057	0.00162949	0.0371598
RPL12L3	32.9434	0.690358	0.219193	3.14954	0.00163526	0.037229
NAP1L4	160.442	-0.608786	0.193433	-3.14726	0.00164807	0.0374715
ATP5A1	405.834	0.661211	0.210152	3.14635	0.00165325	0.03754
NDC1	292.792	0.648545	0.206174	3.14561	0.00165739	0.0375754
VCAN-AS1	2.00157	-1.3616	0.432901	-3.1453	0.00165914	0.0375754
AKAP13	1633.53	-0.546843	0.174051	-3.14186	0.00167879	0.037971
CLK1	247.087	-0.669158	0.213077	-3.14045	0.0016869	0.0380957
RNU4ATAC16P	3.17437	-1.38592	0.441356	-3.14013	0.0016887	0.0380957
APBA1	9.09106	1.35891	0.433032	3.13814	0.00170026	0.0383066
TAS2R63P	9.34024	-1.38254	0.440953	-3.13536	0.00171646	0.0386215
RP11-286E11.1	67.777	-1.31987	0.421036	-3.13481	0.00171963	0.0386426
RP11-839G9.1	2.22502	-1.38287	0.441192	-3.13439	0.00172212	0.0386485
SETD2	948.123	-0.467708	0.149322	-3.13221	0.00173493	0.0388858
NAPEPLD	285.893	-0.555758	0.177514	-3.13079	0.00174337	0.0390246
OSTC	161.312	0.622866	0.199009	3.12983	0.00174907	0.0391017
IKZF2	257.688	-0.659142	0.210719	-3.12807	0.00175961	0.0391421
CTD-2015B23.2	9.23009	1.11388	0.356119	3.12782	0.00176108	0.0391421
ITGA2	3368.38	-0.610778	0.195222	-3.12863	0.00175622	0.0391421
FSCN1	97.0974	-0.954254	0.305104	-3.12764	0.00176216	0.0391421
AP001053.11	2.70715	1.31176	0.41921	3.12913	0.00175327	0.0391421
OS9	232.22	-0.584394	0.187015	-3.12485	0.00177894	0.0394643
HPRT1	95.5484	0.824987	0.264173	3.1229	0.00179078	0.039622
CISD1	135.745	0.748518	0.239714	3.12255	0.0017929	0.039622
CNOT2	490.802	-0.43033	0.137781	-3.1233	0.00178837	0.039622
TPM1	2940.89	-0.616377	0.197452	-3.12165	0.00179841	0.0396932
ECI1	36.2333	0.921325	0.295264	3.12034	0.0018064	0.0398189
TES	655.128	-0.490858	0.157357	-3.11939	0.00181225	0.039897
EHBP1L1	117.67	-0.706984	0.22681	-3.11708	0.00182654	0.0400694
NUDT19	89.8172	0.800491	0.256772	3.11752	0.00182382	0.0400694
AP001625.6	3.26712	-1.35215	0.433799	-3.117	0.00182701	0.0400694
TRAPPC3	79.3303	0.72781	0.233616	3.11541	0.00183689	0.0402353
RNA5SP187	16.0138	-1.26268	0.405536	-3.11361	0.00184814	0.0403742
CLNS1A	196.586	0.600711	0.192974	3.11291	0.00185254	0.0403742
PPL	320.401	-0.7854	0.252275	-3.11327	0.00185028	0.0403742
BLVRB	108.776	0.853821	0.274209	3.11376	0.00184721	0.0403742
RIBC1	3.73322	1.35662	0.436286	3.10948	0.00187418	0.0407945
AC083799.1	21.9957	-0.908004	0.292311	-3.10629	0.00189448	0.0411848
RP11-152C15.1	29.6057	0.746069	0.240283	3.10496	0.00190302	0.0412835
PCNA	129.663	0.718904	0.231543	3.10485	0.00190378	0.0412835
ARID1B	316.312	-0.588764	0.189653	-3.10443	0.00190647	0.0412902
COX6B1	692.248	0.589689	0.190099	3.10201	0.00192208	0.0415764
FAM188A	96.8384	-0.694138	0.223831	-3.10118	0.00192752	0.0416421
RASA2	254.105	-0.672573	0.216998	-3.09945	0.00193883	0.0418344
ADAM12	80.8141	-1.13323	0.36576	-3.09829	0.00194643	0.0419462
RP1-181J22.1	5.78107	0.900199	0.290668	3.097	0.00195488	0.0420761
PLEKHJ1	34.4783	1.16596	0.376531	3.09657	0.00195771	0.0420848
NAP1L1	785.586	0.558285	0.180333	3.09586	0.00196244	0.0421342
PDCD5	112.517	0.848752	0.274223	3.09512	0.00196735	0.0421875
AC074117.10	15.9679	1.30309	0.421166	3.09399	0.00197481	0.0422951
RPS15AP11	11.3003	0.782553	0.253031	3.09271	0.00198338	0.0424262
BEX5	4.51208	1.36372	0.441189	3.091	0.00199482	0.0426184
PTRHD1	21.5636	0.9194	0.297665	3.08871	0.00201029	0.042896
PEBP1	295.415	0.646416	0.209392	3.0871	0.00202119	0.0430756
CTD-2339M3.1	21.5449	-1.22462	0.396933	-3.08521	0.0020341	0.0432002
NHP2	7.75696	1.02057	0.331111	3.08225	0.00205443	0.0432002
RNF217	134.653	-0.953873	0.309338	-3.08359	0.00204516	0.0432002
PTK2	719.205	-0.471227	0.152752	-3.08492	0.00203606	0.0432002
HIF1A	2263.03	-0.5555	0.18014	-3.08371	0.00204437	0.0432002
ACTN1	470.766	-0.503964	0.163505	-3.08226	0.00205432	0.0432002
SUB1P3	5.47554	0.957558	0.310458	3.08434	0.00204007	0.0432002
SMG1	1384.36	-0.368499	0.119475	-3.08432	0.00204019	0.0432002
PHB	190.7	0.690063	0.223692	3.08488	0.00203633	0.0432002
TIMP2	530.955	-0.677077	0.219619	-3.08296	0.00204953	0.0432002
SNRPEP4	45.7309	0.800088	0.259548	3.08262	0.00205189	0.0432002
KCNA7	2.16943	-1.31167	0.426658	-3.07429	0.00211003	0.0443158
RPL21P1	1.95252	1.11514	0.362787	3.07381	0.00211344	0.0443336
AC083843.1	85.5009	-0.89782	0.292154	-3.07311	0.00211843	0.0443848
CTA-276O3.4	12.737	0.849135	0.276351	3.07267	0.00212152	0.0443958
TTLL11	4.57047	1.30295	0.424148	3.07193	0.00212678	0.0444427
RP11-48B14.1	1.63843	1.23746	0.402866	3.07164	0.00212888	0.0444427
RP1-39G22.7	12.2628	1.2635	0.41178	3.06837	0.00215226	0.0447155
NRF1	34.9742	-1.02897	0.335303	-3.06877	0.00214941	0.0447155
RP11-152P17.2	25.8283	-1.21378	0.395574	-3.06839	0.00215215	0.0447155
TM9SF4	444.28	-0.449569	0.146487	-3.06901	0.00214766	0.0447155
NPM1P24	117.782	0.656157	0.213947	3.06692	0.0021628	0.0448634
SLIRP	60.614	0.706452	0.230364	3.06667	0.00216455	0.0448634
CTA-363E19.2	11.4567	-1.21145	0.395123	-3.06601	0.00216933	0.0449088
FAR1	621.54	-0.591199	0.192873	-3.06522	0.00217508	0.044974
SYN2	5.58018	1.33632	0.436161	3.06382	0.0021853	0.0450435
C1QBP	135.956	0.67129	0.219111	3.06369	0.00218622	0.0450435
RPS7P11	14.2412	0.752365	0.245535	3.06419	0.00218262	0.0450435
TMEM64	89.8793	0.808956	0.264241	3.06143	0.00220283	0.0453318
TIMP3	245.553	-0.926079	0.302583	-3.06058	0.00220912	0.0454073
MSN	1082.73	-0.697441	0.227969	-3.05937	0.00221803	0.0455366
SNX29	87.6542	-0.806342	0.263686	-3.05797	0.00222845	0.0456965
SDCCAG8	217.762	-0.598445	0.195781	-3.05671	0.00223784	0.0457807
CTD-2270N23.1	48.0687	0.630867	0.206372	3.05695	0.00223603	0.0457807
MUC3A	1158.95	-1.12463	0.368038	-3.05575	0.00224497	0.0458185
ITGA3	763.102	-0.639062	0.209111	-3.05609	0.0022424	0.0458185
PSMA5	290.971	0.481803	0.157762	3.05399	0.0022582	0.0459803
ALG13	241.638	-0.614772	0.201287	-3.0542	0.00225662	0.0459803
HP1BP3	627.692	-0.450224	0.147449	-3.05341	0.00226254	0.0460148
ST6GALNAC6	10.3856	1.2914	0.423501	3.04935	0.00229337	0.046424
RP11-658F2.8	37.444	-0.93198	0.305618	-3.04949	0.00229229	0.046424
ATP5B	1443.87	0.562264	0.184372	3.04962	0.00229131	0.046424
DCAF13P3	2.19428	-1.34444	0.440872	-3.0495	0.00229225	0.046424
CTD-2636A23.2	4.70518	-1.3405	0.439743	-3.04836	0.00230092	0.0465226
CTC-428G20.3	24.4224	1.09703	0.359989	3.0474	0.00230829	0.046572
OTUD5	162.714	-0.726625	0.238445	-3.04734	0.00230873	0.046572
RP11-390K5.1	7.51596	0.79676	0.261739	3.0441	0.00233379	0.0470228
RBM6	112.448	-0.663773	0.218079	-3.04373	0.00233666	0.0470259
PBDC1	108.131	-0.789952	0.25963	-3.0426	0.00234541	0.0471473
ANXA8L2	2.86649	-1.3422	0.441216	-3.04206	0.00234969	0.0471787
ALKBH7	20.2548	1.07889	0.354871	3.04023	0.00236395	0.0474102
TAS2R64P	9.57175	-1.22237	0.402222	-3.03906	0.00237321	0.0475409
TPT1P4	130.062	0.678828	0.223458	3.03783	0.00238289	0.0476799
FAM114A1	382.325	-0.43452	0.143113	-3.0362	0.0023958	0.0478829
SRRM2	2412.03	-0.56097	0.184814	-3.03533	0.00240274	0.0479664
RP11-492I21.1	19.5778	-1.1888	0.391784	-3.03433	0.00241073	0.0480705
ZNF304	45.3646	1.03616	0.341634	3.03295	0.00242173	0.048191
AP000330.8	26.0668	1.29381	0.426595	3.03288	0.00242233	0.048191
AP3D1	271.669	-0.576889	0.190319	-3.03117	0.0024361	0.0484095
VAMP8	128.927	0.696553	0.229866	3.03026	0.00244344	0.0484799
RP11-95G17.2	2.21661	-1.25832	0.415318	-3.02977	0.00244743	0.0484799
CTHRC1	54.7559	-0.924644	0.305194	-3.02969	0.00244803	0.0484799
RP11-220D10.1	9.26414	0.745285	0.24616	3.02764	0.00246468	0.0487539
RPL26L1	15.5623	0.933108	0.308335	3.02628	0.00247581	0.0489184
TSTD1	38.1126	0.815046	0.26946	3.02473	0.00248851	0.0490717
RP11-537E18.1	1.84545	-1.24569	0.411848	-3.02465	0.00248922	0.0490717
RPL4	1194.29	0.560257	0.185345	3.02278	0.00250462	0.0492631
AC000089.3	43.8025	0.670463	0.22179	3.02296	0.00250318	0.0492631
DAK	24.0511	0.935383	0.309529	3.02196	0.00251145	0.0493417
C16orf72	362.87	-0.485152	0.160561	-3.0216	0.00251445	0.0493446
STXBP5	170.558	-0.58688	0.194301	-3.02047	0.00252383	0.0494728
TGIF1	320.492	0.544103	0.180184	3.0197	0.00253022	0.0494862
PLCB4	311.477	0.829396	0.274653	3.01979	0.00252947	0.0494862
RP6-99M1.2	70.6035	-1.06876	0.354262	-3.01685	0.00255413	0.0498976
SNHG6	55.7032	0.92553	0.307115	3.01362	0.00258147	0.050375
NPM3	9.01721	1.08906	0.361508	3.01256	0.00259054	0.050473
CTD-2560C21.1	4.76725	-1.32013	0.43824	-3.01235	0.00259231	0.050473
ATP11A	728.116	-0.542567	0.180151	-3.01174	0.00259752	0.0505177
PATL1	498.647	-0.485417	0.161212	-3.01104	0.00260351	0.0505775
DBI	266.053	0.58886	0.195609	3.0104	0.00260907	0.0506288
KIAA1551	2061.83	-0.620217	0.206139	-3.00874	0.00262336	0.0508492
EGFR	1061.57	-0.475626	0.158101	-3.00836	0.00262662	0.0508556
COL14A1	35.7503	-1.01893	0.33876	-3.00781	0.00263135	0.050876
TFF3	114.485	1.12543	0.3742	3.00756	0.00263354	0.050876
UBR4	942.512	-0.378973	0.126059	-3.0063	0.00264444	0.0510297
SLC30A6	313.026	0.520355	0.173184	3.00464	0.00265893	0.0512524
MZT2A	26.2815	0.858835	0.286006	3.00286	0.00267457	0.0513825
SEC22A	37.5437	-0.989084	0.329373	-3.00293	0.00267398	0.0513825
RP11-690D19.3	75.4222	-1.09189	0.363611	-3.0029	0.00267422	0.0513825
HMCN1	72.4018	-0.991571	0.330304	-3.00199	0.00268217	0.0514387
IARS	475.763	0.490741	0.163479	3.00185	0.00268342	0.0514387
CLCN7	12.3993	-1.11021	0.369898	-3.00138	0.00268755	0.0514609
ATP2B4	1082.36	-0.584039	0.194626	-3.00083	0.00269244	0.0514977
PRDX5	280.639	0.538307	0.179448	2.99978	0.0027017	0.051618
MAP4	714.089	-0.549243	0.183142	-2.999	0.00270867	0.0516942
SRRM1	808.957	-0.4741	0.158104	-2.99866	0.00271167	0.0516946
LPAR6	172.919	-0.754868	0.251816	-2.9977	0.00272022	0.0518007
PHF13	27.0538	-1.02761	0.343101	-2.99506	0.00274389	0.0521834
ATP6V0A2	188.284	0.615352	0.205474	2.99479	0.00274634	0.0521834
NDUFB2	140.307	0.63544	0.212294	2.9932	0.00276067	0.052284
SFXN4	23.7844	1.02547	0.342538	2.99373	0.00275592	0.052284
TAOK3	376.543	-0.533216	0.178128	-2.99345	0.00275841	0.052284
KIAA1683	4.64953	-1.31547	0.439895	-2.99042	0.00278594	0.0527049
C19orf54	67.738	1.0209	0.341451	2.98988	0.0027909	0.0527414
IRF6	441.141	-0.625168	0.209133	-2.98933	0.00279587	0.0527777
RP11-553D4.2	8.37152	-1.29078	0.431939	-2.98833	0.00280504	0.0528932
SLC25A38	46.0535	0.738102	0.247079	2.98731	0.00281442	0.0529748
RP13-258O15.1	34.1725	0.680281	0.227732	2.9872	0.00281547	0.0529748
EFCAB13	31.4076	-0.857338	0.287096	-2.98624	0.00282427	0.0530827
SHMT2	143.644	0.795454	0.266425	2.98566	0.00282969	0.0531271
NAV1	260.149	-0.84579	0.283433	-2.9841	0.00284418	0.0533415
MRPS21	172.48	0.557176	0.186808	2.9826	0.00285808	0.0535442
KB-431C1.5	8.4299	-1.30782	0.438676	-2.9813	0.0028703	0.0537153
MIR181B1	1.14554	-1.28387	0.430744	-2.98059	0.00287698	0.0537821
SOX4	443.814	-0.624918	0.209862	-2.97776	0.00290361	0.0542215
ZNHIT1	62.7603	0.719965	0.241907	2.97621	0.00291835	0.0544382
RP11-17P16.2	3.9144	-1.30592	0.439015	-2.97465	0.00293319	0.0545976
MTMR10	201.993	-0.726765	0.244312	-2.97473	0.00293242	0.0545976
KRIT1	359.037	-0.497326	0.167238	-2.97376	0.00294173	0.0546979
MRPL22	33.6056	0.803004	0.270081	2.9732	0.00294714	0.0547397
RPL21P11	1.51175	1.14168	0.384362	2.97031	0.00297496	0.0551975
PLEKHA5	793.691	-0.483625	0.162895	-2.96894	0.00298832	0.055386
CARD10	18.0358	-0.996006	0.335526	-2.96849	0.00299264	0.055407
NCOA6	646.38	-0.603524	0.203339	-2.96807	0.00299675	0.055424
CYP2U1	30.4431	1.064	0.358578	2.96727	0.00300455	0.055509
EHF	1410.37	-0.442065	0.149038	-2.96612	0.00301586	0.0556586
AIM1	668.365	-0.650031	0.219234	-2.96501	0.00302676	0.0558005
LARS	599.237	0.449797	0.15176	2.96387	0.00303798	0.0559479
PACSIN2	300.212	-0.619035	0.208886	-2.96351	0.00304152	0.0559536
ATIC	313.313	0.532803	0.179833	2.96277	0.00304884	0.0560289
RP11-274B21.1	85.992	-0.830459	0.280373	-2.96198	0.00305671	0.056114
MKX	7.21572	1.27342	0.429982	2.96156	0.0030608	0.0561298
TTC14	159.657	-0.759742	0.256576	-2.96108	0.00306563	0.0561339
OSBPL3	465.646	-0.547679	0.185032	-2.95992	0.00307721	0.0561339
STOX1	6.11941	1.30665	0.441362	2.9605	0.0030714	0.0561339
C11orf1	84.3414	0.744713	0.251579	2.96015	0.00307485	0.0561339
MAP4K5	425.263	-0.429197	0.144991	-2.96017	0.00307474	0.0561339
TIA1	325.458	-0.570098	0.192631	-2.95953	0.00308109	0.0561458
RPL34P34	16.8587	0.730521	0.246964	2.95801	0.00309631	0.0563639
AL138706.1	4.51532	-1.30406	0.44109	-2.95646	0.00311192	0.0564874
CIRH1A	237.543	-0.533047	0.180305	-2.95637	0.00311286	0.0564874
RPL18	910.416	0.583775	0.197433	2.95683	0.00310818	0.0564874
RP11-641D5.1	356.438	0.611979	0.207061	2.95555	0.00312112	0.0565252
PSMA7	256.893	0.546396	0.184873	2.95552	0.00312146	0.0565252
CTAGE10P	8.7807	-0.819678	0.277384	-2.95503	0.00312643	0.056556
LRRC15	18.757	-1.23895	0.41965	-2.95236	0.00315359	0.0569288
PPP1R2P3	46.4264	-0.616173	0.208688	-2.95261	0.00315102	0.0569288
C8orf31	28.6359	-1.2602	0.426926	-2.95179	0.00315941	0.0569744
AGR2	2957.53	0.665332	0.225478	2.95076	0.00316998	0.0570465
AK1	6.76966	1.29077	0.437435	2.95077	0.00316984	0.0570465
FCHO2	286.602	-0.535267	0.18148	-2.94945	0.00318335	0.0572277
MICAL2	429.857	-0.570376	0.193537	-2.94711	0.00320755	0.0576031
NFRKB	78.603	-0.835342	0.283492	-2.94661	0.00321279	0.0576375
NISCH	58.5646	-0.929335	0.315496	-2.94563	0.00322295	0.0577601
ATP5F1	402.059	0.473859	0.160984	2.94353	0.00324496	0.0580346
TMEM258	62.7593	0.712616	0.242095	2.94353	0.00324487	0.0580346
SNORA19	2.64672	-1.27594	0.433626	-2.94248	0.00325594	0.058171
TCEB1	119.575	0.702054	0.238738	2.94068	0.00327489	0.0583893
DLST	167.227	-0.622389	0.211628	-2.94096	0.003272	0.0583893
PLA2G4C	3.14942	1.29772	0.441349	2.94035	0.00327846	0.0583929
BIRC5	19.0777	1.15091	0.391761	2.93778	0.00330575	0.0588186
SRSF11	636.539	-0.4935	0.168015	-2.93724	0.00331149	0.0588482
AP1S3	126.165	-0.719486	0.244974	-2.93699	0.0033142	0.0588482
KDELC1P1	6.90495	-1.29409	0.440672	-2.93662	0.00331809	0.0588571
CELSR1	113.487	-0.722604	0.246229	-2.93468	0.00333893	0.0591663
DLG1	484.655	-0.409631	0.139637	-2.93355	0.00335114	0.059322
KDELR2	2144.66	0.48005	0.163672	2.933	0.00335706	0.0593662
EIF2B2	65.3787	-0.783273	0.267173	-2.93171	0.00337106	0.059553
USP34	1007.11	-0.326715	0.111465	-2.9311	0.00337766	0.059609
GCC2	1887.59	-0.50455	0.172185	-2.93028	0.00338653	0.0596441
MBNL2	1578.25	-0.46439	0.158479	-2.93029	0.00338651	0.0596441
RPL23A	30.7246	0.920587	0.314314	2.92887	0.00340193	0.0598547
RPL22L1	49.3201	0.945088	0.322802	2.92776	0.00341413	0.0600084
GPR125	317.39	-0.560408	0.191585	-2.92512	0.00344325	0.060276
PANK1	18.7571	1.05102	0.359227	2.92577	0.00343604	0.060276
LGMN	922.752	-0.679764	0.232371	-2.92534	0.00344076	0.060276
RP11-53B2.2	14.8035	-1.2909	0.441312	-2.92514	0.003443	0.060276
C1orf63	86.3323	-0.82711	0.283068	-2.92195	0.00347845	0.0607696
CDC25A	10.9355	1.24029	0.424448	2.92212	0.00347658	0.0607696
TMEM44-AS1	3.10695	1.27205	0.435499	2.9209	0.00349017	0.060913
GPN3	36.5958	0.944567	0.323432	2.92045	0.00349525	0.0609403
ANKRD17	1406.2	-0.324498	0.111154	-2.91936	0.00350747	0.061092
ZNF527	40.602	-1.017	0.348476	-2.91843	0.00351801	0.0612142
NIP7	141.299	0.59827	0.2051	2.91696	0.00353459	0.061441
ZMYM5	217.944	-0.643393	0.2206	-2.91657	0.00353908	0.0614574
ABRACL	36.4594	0.759487	0.260534	2.91512	0.00355554	0.0616815
ILVBL	27.1653	0.891172	0.305797	2.91426	0.00356527	0.0617886
NT5C2	151.863	-0.483064	0.165812	-2.91332	0.00357604	0.0619134
RSRC1	150.3	-0.701077	0.240685	-2.91284	0.00358159	0.061919
RP11-309L24.6	1.34188	-1.18899	0.408252	-2.91239	0.00358675	0.061919
SPAG7	12.0124	0.954892	0.327875	2.91236	0.00358708	0.061919
TUSC1	4.66201	1.23828	0.425478	2.91033	0.00361048	0.062261
RP6-65G23.3	11.0315	-1.2621	0.433777	-2.90956	0.00361942	0.0623532
RPL9P8	7.86354	0.727951	0.250277	2.90858	0.00363074	0.0624863
RP11-295P9.3	57.1698	-0.975894	0.335569	-2.90818	0.00363539	0.0625042
ZNF236	86.3586	-0.687778	0.236608	-2.90682	0.00365118	0.0627136
RPL9P28	21.5159	-1.25032	0.430267	-2.9059	0.00366196	0.0628364
LINC00969	58.0649	-0.889067	0.305986	-2.90558	0.00366573	0.0628389
SIX2	7.4994	-1.27933	0.440449	-2.9046	0.00367718	0.0629731
VPS13A	770.65	-0.53192	0.183162	-2.90409	0.00368317	0.0630134
MSMB	12.7832	1.23152	0.424286	2.90258	0.00370104	0.0632119
RAB8B	228.224	-0.706015	0.243244	-2.90249	0.00370206	0.0632119
EDC4	46.9659	-1.01658	0.350286	-2.90214	0.00370618	0.0632201
SEPT7P2	47.1071	-0.699832	0.24122	-2.90122	0.00371708	0.0633438
LINC00472	38.6647	-1.04814	0.361388	-2.90033	0.00372769	0.0634621
IGFBP3	591.053	-0.906746	0.312714	-2.8996	0.00373634	0.0635472
RP11-275I14.4	3.92055	-1.23341	0.426205	-2.89394	0.00380439	0.064641
STK24	546.742	-0.471396	0.162969	-2.89255	0.0038213	0.0648649
QSOX1	1221.04	-0.550924	0.190513	-2.89179	0.00383053	0.064958
COL11A1	203.012	-1.0928	0.377993	-2.89106	0.00383942	0.0649921
ACACA	369.654	-0.502459	0.173801	-2.89101	0.00384004	0.0649921
SH3KBP1	395.341	-0.61027	0.211205	-2.88947	0.0038589	0.0651826
RP11-587D21.1	96.2449	0.577586	0.199935	2.88887	0.00386632	0.0651826
SNHG11	11.8668	1.19875	0.414918	2.88913	0.00386315	0.0651826
RPL34P33	10.374	0.677266	0.234397	2.8894	0.00385984	0.0651826
RPL29P11	1.09592	1.20233	0.416487	2.88684	0.00389135	0.0655046
RP1-86D1.5	19.8789	-1.22138	0.423104	-2.88671	0.00389297	0.0655046
HMGCL	21.53	0.991371	0.343835	2.88328	0.00393561	0.0661238
DKK4	13.4398	1.27134	0.440956	2.88313	0.00393739	0.0661238
RP11-13N12.1	14.2759	-1.26548	0.439122	-2.88184	0.00395356	0.0663311
EDIL3	143.239	-0.957578	0.332479	-2.88011	0.00397536	0.0666324
BMP2K	224.192	-0.599255	0.208166	-2.87874	0.0039927	0.066794
RPL7L1P12	0.928727	-1.22494	0.42547	-2.87904	0.0039889	0.066794
AC116366.6	3.47662	-1.27039	0.441354	-2.87838	0.00399719	0.0668046
RAI14	379.432	-0.658303	0.228797	-2.87724	0.00401174	0.0669834
SLMAP	940.476	-0.375689	0.130597	-2.87672	0.00401836	0.0670293
AHNAK2	1972.88	-0.747301	0.259857	-2.87581	0.00402987	0.0671568
ZNF708	162.718	-0.859829	0.299187	-2.87388	0.00405463	0.0675046
LSM3	97.8656	0.745911	0.259609	2.87321	0.00406321	0.0675826
RBM41	172.649	-0.706486	0.246075	-2.87102	0.00409152	0.0679232
PVRL2	483.666	-0.693506	0.24153	-2.87131	0.0040878	0.0679232
PMS2P3	7.42134	-1.17359	0.408893	-2.87017	0.00410253	0.0679758
EMP1	460.584	-0.790866	0.275538	-2.87026	0.00410137	0.0679758
CUX1	596.325	-0.484963	0.168985	-2.86986	0.00410655	0.0679775
KATNBL1	88.6162	-0.635273	0.221473	-2.8684	0.00412559	0.0682276
RP11-382D8.3	6.57824	-1.24516	0.434281	-2.86719	0.00414138	0.0683524
GOLGA4	2151.62	-0.42431	0.147972	-2.86751	0.0041372	0.0683524
AKAP10	102.019	-0.758023	0.264404	-2.86691	0.00414496	0.0683524
CALD1	631.559	-0.728719	0.25425	-2.86615	0.00415499	0.0684528
CATSPERB	45.9369	-1.04061	0.363145	-2.86554	0.00416303	0.0685202
ST5	131.957	-0.716175	0.250004	-2.86466	0.00417462	0.0686457
ZNF696	5.86674	1.19151	0.415997	2.86423	0.00418022	0.0686728
ZDHHC14	67.0214	-0.910388	0.317933	-2.86346	0.00419045	0.0687756
MTHFD2	117.488	0.800973	0.279789	2.86278	0.00419944	0.0688581
WBSCR16	5.85552	1.17315	0.40995	2.86168	0.00421403	0.069032
HSPA4	544.071	0.416016	0.145406	2.86107	0.00422208	0.0690987
KIAA0753	82.868	-0.737203	0.257788	-2.85972	0.00424011	0.0693283
RP11-384K6.2	1.71669	1.24443	0.435481	2.8576	0.00426864	0.0697292
TIMM8BP2	2.69798	0.997628	0.349154	2.85727	0.004273	0.0697347
RP11-680F8.1	2.97628	1.26077	0.441368	2.8565	0.00428335	0.069838
RBM44	11.1119	-1.21815	0.426525	-2.85599	0.00429032	0.0698615
ACER2	144.375	1.02182	0.357807	2.8558	0.00429285	0.0698615
GPR180	156.135	-0.654994	0.229393	-2.85534	0.00429913	0.0698982
GPNMB	126.162	-0.831454	0.291235	-2.85492	0.00430476	0.0699242
RP11-203B9.4	9.10109	-1.10276	0.386382	-2.85407	0.00431635	0.0700467
FADD	11.0752	-0.860798	0.301711	-2.85305	0.00433016	0.0702052
DAP3	134.793	0.579373	0.203145	2.85201	0.00434435	0.0703368
AC079210.1	6.49994	-1.25433	0.439827	-2.85186	0.00434638	0.0703368
C4orf3	181.41	0.624976	0.219186	2.85135	0.00435336	0.0703841
LRRC8C	105.193	-0.916511	0.321523	-2.85053	0.00436463	0.0705006
DIMT1	107.156	0.540982	0.189822	2.84994	0.00437279	0.0705011
AB019441.29	130.562	0.634273	0.222538	2.85017	0.00436953	0.0705011
ZCCHC6	590.679	-0.460128	0.161474	-2.84956	0.00437804	0.0705201
SLC25A4	72.0091	0.749538	0.26307	2.84919	0.00438301	0.0705347
RPL36AL	440.811	0.470035	0.165084	2.84725	0.00440981	0.0709002
TIMP4	6.03163	1.25526	0.440951	2.84671	0.00441736	0.0709559
RP11-296E7.1	264.738	-0.630204	0.221457	-2.84571	0.00443123	0.0711128
NDUFS4	95.9171	0.649133	0.228163	2.84504	0.00444056	0.071189
PLAU	61.9597	-0.998834	0.351111	-2.84478	0.00444418	0.071189
CXCL5	1165.57	1.12615	0.395965	2.84407	0.00445406	0.0712814
ATAD2B	252.092	-0.610065	0.214622	-2.84251	0.00447595	0.0715657
CARD11	87.5463	-0.948188	0.333659	-2.84178	0.00448619	0.0716633
TRIO	377.513	-0.54453	0.191699	-2.84055	0.00450359	0.0718091
TTC9	184.59	-0.83838	0.29513	-2.84071	0.00450131	0.0718091
AC016708.2	32.3751	0.606138	0.213519	2.8388	0.00452829	0.0721367
TINAG	10.0528	1.20376	0.424136	2.83814	0.00453768	0.0722198
TNC	109.833	-1.16792	0.411551	-2.83785	0.00454184	0.0722198
RP11-274J7.2	8.65802	-1.25134	0.441349	-2.83526	0.00457891	0.072676
TJP1	2638.51	-0.429579	0.151512	-2.83529	0.00457845	0.072676
LGMNP1	14.5305	-0.759112	0.267822	-2.83439	0.00459131	0.0728063
BASP1	30.1485	-1.05898	0.373712	-2.83369	0.0046014	0.0728914
WAS	2.40926	1.23262	0.435028	2.83343	0.00460508	0.0728914
KLRAP1	12.5986	-1.11863	0.394931	-2.83247	0.00461905	0.0729128
ZNF469	9.18995	-1.20851	0.426653	-2.83255	0.0046179	0.0729128
BCR	81.9666	-0.72384	0.255549	-2.83249	0.00461875	0.0729128
RP11-436H11.1	9.01721	0.749777	0.264786	2.83164	0.00463102	0.072969
SKP1P1	48.3812	0.578984	0.204454	2.83186	0.00462786	0.072969
RP11-137N23.1	15.9222	0.747261	0.263927	2.83131	0.00463571	0.0729766
CXCR6	5.46777	1.21282	0.428465	2.83062	0.00464586	0.0730701
RPS27L	210.124	0.589659	0.208409	2.82934	0.00466438	0.073295
SBF2	337.118	-0.578752	0.204664	-2.82782	0.00468667	0.0735785
CASC14	2.34108	-1.24147	0.439176	-2.82681	0.00470139	0.073614
ASAP1	436.325	-0.586377	0.207408	-2.82717	0.00469616	0.073614
CST2	4.16722	-1.20594	0.426611	-2.82679	0.00470166	0.073614
TSPAN13	343.626	0.684884	0.242439	2.82498	0.00472839	0.0738991
AP003068.23	17.0975	-1.0275	0.363683	-2.82526	0.00472424	0.0738991
OMG	42.0575	-0.983978	0.348364	-2.82457	0.0047344	0.0739265
RP11-216N14.7	4.08157	-1.20708	0.427452	-2.8239	0.00474431	0.0739931
KIAA2026	400.106	-0.453226	0.160521	-2.82347	0.00475071	0.0739931
SLCO1C1	4.234	1.19412	0.422935	2.82342	0.00475146	0.0739931
RP11-260M2.1	4.24583	-1.2089	0.428406	-2.82185	0.00477472	0.0742622
FRMD6	172.087	-0.714678	0.253281	-2.82168	0.0047773	0.0742622
PIP4K2C	215.544	-0.615193	0.218143	-2.82013	0.00480037	0.074554
NDUFA11	11.8927	0.822257	0.291649	2.81934	0.00481226	0.0746718
FAM3C2	289.317	-0.719867	0.25539	-2.81869	0.00482195	0.0747552
C6orf201	1.29771	-1.18469	0.420446	-2.8177	0.00483685	0.0749193
CD58	78.5111	-0.665553	0.236341	-2.81607	0.00486152	0.0750504
CHCHD5	14.4769	0.937483	0.332847	2.81656	0.00485414	0.0750504
RP11-311B14.1	10.1403	-1.16993	0.415457	-2.816	0.00486262	0.0750504
PMP22	176.939	-0.806467	0.286359	-2.81628	0.0048583	0.0750504
ISCA1	73.6204	0.791501	0.281153	2.8152	0.00487475	0.0751249
HECTD2	63.4687	-0.76352	0.271222	-2.81511	0.0048761	0.0751249
THOC2	679.319	-0.397732	0.141369	-2.81343	0.00490157	0.0753834
TEP1	134.53	-0.673594	0.239409	-2.81357	0.00489949	0.0753834
ADAMTS9-AS2	8.56674	-1.23113	0.437797	-2.81211	0.00492178	0.0754267
RP11-502I4.3	1.78041	1.24118	0.441346	2.81226	0.00491953	0.0754267
FAUP1	58.1174	0.661733	0.235299	2.8123	0.00491886	0.0754267
TSHZ2	134.162	-0.800212	0.28449	-2.81279	0.00491132	0.0754267
SET	626.703	0.429658	0.15286	2.81078	0.0049421	0.0756712
SFRP1	11.7188	-1.19149	0.424012	-2.81004	0.00495352	0.0757793
SNRPG	60.7055	0.705028	0.251029	2.80855	0.00497644	0.0758575
AC009404.2	4.45406	-1.22385	0.435972	-2.80716	0.00499799	0.0758575
NDUFC1	36.5956	0.851752	0.303221	2.80901	0.00496941	0.0758575
AC008937.2	2.56944	-1.16134	0.413685	-2.80729	0.00499602	0.0758575
ANGPTL2	67.0998	-0.892473	0.317894	-2.80746	0.00499344	0.0758575
RP11-16F15.1	39.0347	0.605503	0.215675	2.80748	0.00499311	0.0758575
RP11-484D2.5	1.62984	-1.2396	0.441353	-2.80863	0.00497525	0.0758575
PHF21A	211.483	-0.65506	0.233218	-2.80878	0.00497292	0.0758575
RPL12P4	520.65	0.568004	0.202329	2.80732	0.00499548	0.0758575
SRSF5	455.811	-0.45098	0.160732	-2.80578	0.00501944	0.0761165
PHACTR4	303.875	-0.619371	0.220833	-2.8047	0.00503641	0.076174
ENTPD3-AS1	5.31872	1.20547	0.429766	2.80495	0.00503242	0.076174
CDKN2AIPNL	20.0707	0.887296	0.316341	2.80487	0.00503366	0.076174
ZFPL1	4.52349	1.16559	0.41573	2.80372	0.0050517	0.0763388
SGOL1	60.7855	0.836034	0.298262	2.80301	0.00506275	0.0764391
LRRC58	453.206	0.368042	0.131321	2.80262	0.00506901	0.0764671
MPC2	197.32	0.695769	0.248292	2.80222	0.00507517	0.0764935
DHX36	316.324	-0.391357	0.139713	-2.80114	0.0050922	0.0766836
RPL17P17	7.55672	-1.22637	0.437931	-2.80038	0.00510432	0.0767712
CLDN9	6.1687	-1.23245	0.440127	-2.80021	0.00510687	0.0767712
CTC-503J8.6	30.9876	0.928545	0.331729	2.79911	0.00512434	0.0769672
ADH1A	2.04855	-1.19496	0.427055	-2.79814	0.00513971	0.0771312
RUVBL1	110.346	0.711706	0.254382	2.79778	0.00514553	0.0771518
TANC1	250.652	-0.472319	0.168872	-2.79691	0.00515934	0.077243
RP11-458F8.2	3.68514	1.23383	0.441152	2.79684	0.00516052	0.077243
NPM1P6	70.3872	0.589949	0.210993	2.79606	0.00517306	0.0773588
CELF1	651.405	-0.396994	0.142011	-2.79553	0.00518149	0.0773588
NARS	503.582	0.479535	0.171537	2.79552	0.00518163	0.0773588
RPS6KA2	120.032	-0.702564	0.251467	-2.79386	0.00520834	0.0775573
NDUFC2	34.8963	0.709132	0.253797	2.7941	0.00520449	0.0775573
FAM211A-AS1	279.379	0.65309	0.233743	2.79406	0.00520516	0.0775573
XIAP	379.674	-0.373255	0.133741	-2.79089	0.00525639	0.0782057
COX6A1	106.871	0.575848	0.20651	2.78847	0.00529574	0.0787237
RAB33B	88.3734	0.60529	0.217197	2.78682	0.00532276	0.0788145
RP11-372K14.2	3.29515	1.21694	0.436666	2.78689	0.00532164	0.0788145
FTX	181.166	-0.790667	0.283673	-2.78725	0.00531573	0.0788145
HTATIP2	135.67	0.571851	0.205146	2.78753	0.00531121	0.0788145
ESD	606.602	0.466534	0.167414	2.78671	0.00532457	0.0788145
TMPO-AS1	13.6454	1.15195	0.413417	2.78642	0.00532934	0.0788179
ORMDL1	149.692	-0.635641	0.228169	-2.78584	0.00533898	0.0788932
SLC16A9	33.8255	1.20403	0.432259	2.78545	0.00534539	0.0789207
PREP	139.167	0.573556	0.206007	2.78416	0.00536662	0.0791193
AMBRA1	155.603	-0.748356	0.268798	-2.78408	0.00536796	0.0791193
TTC23	49.8999	-0.809322	0.290727	-2.78379	0.00537279	0.0791232
PDE6B	1.71401	1.13595	0.408171	2.78303	0.00538538	0.0791743
RP11-508N12.2	2.86961	-1.21513	0.436615	-2.78308	0.00538462	0.0791743
SKP1	265.661	0.434263	0.156056	2.78274	0.00539023	0.0791784
AC009299.2	4.01238	-1.17012	0.420623	-2.78187	0.0054047	0.0792568
DIAPH2-AS1	11.8506	-1.1147	0.40067	-2.78209	0.00540108	0.0792568
SDC3	194.035	-0.741392	0.26658	-2.78112	0.00541716	0.0793724
SERPINA10	0.986292	1.1487	0.413094	2.78073	0.00542364	0.0794003
SPTLC1	294.414	-0.528268	0.190017	-2.78011	0.00543399	0.0794177
VPS25	66.9776	0.792342	0.284982	2.78032	0.00543048	0.0794177
ITGB1BP1	61.8271	0.722446	0.259912	2.77958	0.00544299	0.0794823
RP11-231C14.3	8.92991	-0.912428	0.328345	-2.77887	0.00545489	0.0794914
UBL5	139.567	0.512301	0.184366	2.77872	0.00545736	0.0794914
RAB3D	116.246	0.816763	0.293899	2.77906	0.00545162	0.0794914
AC083884.8	26.4903	-0.929433	0.334744	-2.77655	0.005494	0.0799063
RHEB	125.861	0.482534	0.17381	2.77621	0.00549966	0.0799063
PLEKHG6	29.7295	-1.08307	0.390122	-2.77624	0.00549919	0.0799063
KIAA1109	1013.38	-0.382092	0.137677	-2.77529	0.00551532	0.0799572
AC099522.2	8.44137	0.972849	0.350552	2.77519	0.00551699	0.0799572
ANXA2	4501.18	-0.423314	0.152527	-2.77534	0.00551441	0.0799572
SPCS1	198.559	0.443725	0.15992	2.77467	0.00552574	0.0800171
PDSS2	83.6094	0.725535	0.261734	2.77203	0.00557083	0.0806028
STX19	18.4523	-0.995611	0.359332	-2.77073	0.00559315	0.0808583
JADE1	151.067	0.642071	0.232016	2.76736	0.00565122	0.0815619
DAD1	458.201	0.38562	0.139345	2.76738	0.00565087	0.0815619
BTBD19	23.4838	-1.07688	0.389365	-2.76573	0.00567954	0.0818534
GNAI2	335.344	-0.521812	0.188676	-2.76566	0.00568085	0.0818534
DNAJC27-AS1	1.0408	1.13798	0.411715	2.76401	0.0057096	0.0819954
RP11-373D23.2	6.3346	-1.04282	0.377224	-2.76445	0.00570193	0.0819954
RP11-101E7.2	2.15574	-1.19322	0.431624	-2.76448	0.00570139	0.0819954
ONECUT2	889.416	-0.750723	0.271607	-2.76401	0.00570962	0.0819954
CYP3A5	902.521	-0.741196	0.268386	-2.76168	0.00575051	0.0825143
RP11-392P7.6	49.8017	-0.940061	0.340433	-2.76137	0.00575589	0.0825233
RANP1	137.728	0.59883	0.216902	2.76084	0.0057653	0.08259
SOWAHA	7.87282	1.19212	0.43197	2.75973	0.00578491	0.0828025
CYP27C1	12.4632	-1.21757	0.441314	-2.75896	0.00579849	0.0829285
EIF3E	1011.02	0.415084	0.15052	2.75767	0.00582149	0.0829409
RP11-15J10.1	7.38669	-1.05427	0.382285	-2.75781	0.00581895	0.0829409
RP11-77P6.2	6.44755	-1.14985	0.416966	-2.75765	0.00582181	0.0829409
RP11-267J23.4	10.0268	-0.837531	0.303722	-2.75756	0.00582354	0.0829409
CAB39L	49.3688	-0.96899	0.351427	-2.7573	0.00582805	0.0829409
EFCAB6	32.2735	-1.01891	0.369393	-2.75833	0.00580971	0.0829409
HINT3	100.138	0.721618	0.261832	2.75603	0.00585069	0.0830588
CAMKK1	3.76859	1.21385	0.440403	2.75623	0.00584721	0.0830588
TMEM205	25.3181	0.808487	0.293315	2.75637	0.00584465	0.0830588
HMGB1P24	6.44351	-1.17868	0.427806	-2.75518	0.00586598	0.0832077
UBIAD1	70.0655	0.809311	0.294048	2.75231	0.00591773	0.0833143
PTPN2P1	27.0893	-0.88375	0.321164	-2.75171	0.00592853	0.0833143
RP3-437C15.1	19.1425	-0.727479	0.264288	-2.7526	0.00591238	0.0833143
RP11-613F7.1	5.63378	0.849338	0.308653	2.75176	0.00592764	0.0833143
NSUN5	17.6362	0.986539	0.358392	2.75268	0.00591091	0.0833143
RPS3AP25	2.47489	0.923681	0.335371	2.75421	0.00588347	0.0833143
CPSF4	12.8834	0.960887	0.348946	2.75368	0.00589288	0.0833143
VDAC3	134.83	0.628399	0.228401	2.7513	0.00593593	0.0833143
PHF20L1	605.455	-0.42772	0.155389	-2.75257	0.00591299	0.0833143
TCEA1P4	4.02283	-1.21369	0.440817	-2.75328	0.00590017	0.0833143
TFAM	208.682	0.583443	0.212001	2.75208	0.00592185	0.0833143
UBE2Q2P6	14.7046	0.650249	0.23634	2.75133	0.00593544	0.0833143
PSMD8	225.07	0.584041	0.212096	2.75366	0.00589335	0.0833143
SEC61G	104.498	0.639615	0.232514	2.75087	0.00594369	0.0833558
TJAP1	40.745	-0.841759	0.306119	-2.74978	0.00596357	0.0835671
REPS1	197.846	-0.650185	0.236502	-2.74917	0.00597459	0.0835948
RP11-121L10.3	215.255	0.629473	0.228971	2.74914	0.00597519	0.0835948
ADI1	152.725	0.485119	0.176535	2.748	0.00599595	0.0837501
RP11-393N4.2	0.847934	1.21063	0.440512	2.74824	0.00599158	0.0837501
BTF3	497.555	0.405204	0.147487	2.74739	0.00600717	0.0838394
RNU6-251P	3.24219	-1.13015	0.411419	-2.74696	0.006015	0.0838812
RPA3-AS1	108.409	-0.597362	0.217534	-2.74606	0.00603162	0.0840455
RP11-981G7.6	8.82266	-1.20518	0.439016	-2.74518	0.00604775	0.0842025
HBP1	280.323	-0.407032	0.148384	-2.74311	0.00608611	0.0846686
DNAJC19	127.579	0.613339	0.223636	2.74258	0.00609586	0.0847364
SPON2	22.552	-0.85972	0.31354	-2.74198	0.00610703	0.0847558
RBM24	1.40794	1.1988	0.437171	2.74217	0.0061034	0.0847558
ENPP7P4	0.826673	1.1625	0.424118	2.74098	0.0061256	0.0849455
ZEB1	312.207	-0.770757	0.281259	-2.74038	0.00613676	0.0850324
GAPDHP49	9.23894	-1.14425	0.417643	-2.73977	0.00614819	0.0851227
WDR18	10.4697	1.07903	0.393958	2.73894	0.00616372	0.0852698
ITGBL1	150.016	-0.884043	0.322933	-2.73754	0.00619004	0.0852937
UBN1	134.66	-0.66792	0.243975	-2.73766	0.00618781	0.0852937
DYNC1LI2	381.309	-0.489301	0.1787	-2.73811	0.00617934	0.0852937
SLC35C2	65.351	0.730925	0.266961	2.73795	0.00618237	0.0852937
WDR83OS	25.4225	0.790847	0.288877	2.73766	0.00618784	0.0852937
ME2	205.992	0.80104	0.292674	2.73697	0.0062008	0.0853742
ANAPC16	161.332	0.544508	0.199069	2.73528	0.00623278	0.0857407
RP11-359E10.1	0.951572	-1.1611	0.424529	-2.73504	0.00623731	0.0857407
LRRC70	5.37735	-1.129	0.412916	-2.73421	0.00625308	0.0858544
COX5A	267.609	0.500675	0.183124	2.73408	0.00625548	0.0858544
MED23	236.809	-0.566624	0.207297	-2.73339	0.00626863	0.0859286
TMEM187	6.57601	1.12409	0.41126	2.73328	0.00627079	0.0859286
KLK1	43.1245	1.1676	0.427412	2.73179	0.00629913	0.0862489
SF3B14	168.288	0.573319	0.209954	2.73069	0.00632019	0.0862649
CHST10	6.06078	1.18258	0.432996	2.73115	0.00631142	0.0862649
NTM	94.9532	-0.954894	0.349602	-2.73138	0.00630705	0.0862649
PFDN5	244.401	0.576365	0.211062	2.73079	0.00631829	0.0862649
PAICS	747.66	0.53838	0.197229	2.72972	0.00633876	0.0862727
AP1G2	30.3807	-0.881379	0.322894	-2.72962	0.00634066	0.0862727
RSL24D1	233.301	0.4538	0.166234	2.72988	0.00633569	0.0862727
CTD-3065B20.3	1.38363	-1.20487	0.441351	-2.72996	0.00633422	0.0862727
GAS1	8.26876	-1.19511	0.43797	-2.72875	0.00635751	0.0863665
ZNF461	24.4673	0.91152	0.334033	2.72883	0.00635597	0.0863665
ZNF587	101.134	-0.684101	0.250955	-2.72599	0.00641094	0.0870243
ZNF619	28.558	0.934633	0.343009	2.7248	0.00643396	0.0872523
CD2AP	3449.13	-0.504456	0.185149	-2.7246	0.00643794	0.0872523
BZW2	230.246	0.502847	0.184575	2.72435	0.00644283	0.0872523
TREM1	12.5062	-1.19974	0.440562	-2.72322	0.00646495	0.0874836
ZFAT	65.1322	-0.742464	0.272731	-2.72233	0.00648234	0.0876434
HNRNPA1	533.004	0.414911	0.152423	2.7221	0.00648687	0.0876434
NFYA	188.82	-0.627539	0.230608	-2.72124	0.00650381	0.087804
IGLV2-14	1.74472	-1.19118	0.437855	-2.72049	0.00651845	0.0879332
PNPLA8	188.246	-0.470923	0.173224	-2.71857	0.00655649	0.0883777
RP11-1023L17.1	50.3199	-0.839658	0.308966	-2.71764	0.00657501	0.0884898
CLEC16A	111.767	-0.714728	0.262992	-2.71768	0.00657423	0.0884898
ST3GAL6	52.0102	-0.940914	0.346283	-2.71718	0.00658405	0.0885427
TPRKB	35.2598	0.805416	0.296585	2.71563	0.00661494	0.0886832
POLR2H	106.591	0.734228	0.270367	2.71567	0.00661418	0.0886832
RP11-93I21.3	8.30394	-1.19872	0.441318	-2.71622	0.00660323	0.0886832
DNM1L	443.976	-0.478053	0.176031	-2.71574	0.00661287	0.0886832
RPS28	19.1474	0.801895	0.29544	2.71423	0.0066429	0.0889893
TMSB4XP1	2.45242	-0.941569	0.34699	-2.71353	0.00665702	0.0890429
FAM135A	844.482	-0.61903	0.228128	-2.71352	0.00665717	0.0890429
CDC16	186.49	-0.596684	0.219917	-2.71322	0.00666329	0.089056
HSD17B7P2	11.5784	-1.07269	0.395445	-2.71262	0.00667538	0.089089
HEATR3	67.06	0.696124	0.256627	2.71259	0.00667602	0.089089
DUSP23	31.2747	0.886318	0.326864	2.71158	0.00669634	0.0892914
NIT1	24.1294	-0.92691	0.341923	-2.71087	0.00671066	0.0894136
RP11-140K17.3	5.48573	1.14673	0.423168	2.70988	0.00673078	0.089562
SHC3	4.11604	-1.1901	0.439183	-2.70981	0.00673212	0.089562
RGS16	16.2987	-1.10853	0.409146	-2.70936	0.00674127	0.089615
AL450992.2	3.92817	1.1943	0.441369	2.7059	0.00681205	0.0904209
C15orf52	33.3667	-0.983775	0.363569	-2.70588	0.00681232	0.0904209
TYW5	115.369	-0.734501	0.271589	-2.70446	0.00684164	0.090533
ZNF117	402.929	-0.799526	0.295632	-2.70447	0.0068414	0.090533
L1CAM	9.95004	-1.192	0.440722	-2.70465	0.00683773	0.090533
OCEL1	16.9311	1.05828	0.391233	2.70499	0.00683058	0.090533
MAP1A	38.2994	-0.93096	0.344274	-2.70413	0.00684839	0.0905532
ANAPC7	49.3283	0.667777	0.247127	2.70216	0.00688909	0.091022
UCK2	127.217	0.5282	0.195527	2.70141	0.00690464	0.0911519
TTC17	626.88	-0.388658	0.143889	-2.7011	0.00691108	0.0911519
TAPBPL	91.1094	-0.830014	0.307307	-2.70093	0.00691468	0.0911519
SH3BP2	109.764	-0.760778	0.281761	-2.70009	0.0069321	0.0912578
ATP6AP1L	18.3461	-1.10053	0.407597	-2.70003	0.00693324	0.0912578
TRMT11	113.504	-0.634761	0.235126	-2.69966	0.00694096	0.0912903
STX2	84.2265	-0.812491	0.30104	-2.69894	0.00695604	0.09135
RPL5P1	301.239	0.596369	0.220963	2.69895	0.00695579	0.09135
NFKBIZ	523.911	-0.675871	0.250489	-2.69821	0.0069714	0.0914133
RP11-113A11.1	2.58822	-1.18028	0.437405	-2.69837	0.00696801	0.0914133
GRIK1	6.60358	-1.08452	0.402009	-2.69774	0.00698117	0.0914723
IGFBP5	509.355	-0.790576	0.29316	-2.69674	0.00700228	0.0916105
KCNQ1OT1	543.595	-0.704779	0.261326	-2.69693	0.00699818	0.0916105
BCL2L14	74.6706	0.869985	0.322648	2.69639	0.00700955	0.0916366
AC091492.2	4.78506	-0.979597	0.363411	-2.69556	0.00702705	0.0917961
ESYT2	1161.66	-0.375965	0.139528	-2.69454	0.00704851	0.0920072
TTLL4	147.236	-0.692236	0.256935	-2.69421	0.00705567	0.0920314
AGTRAP	22.8666	0.902395	0.334984	2.69384	0.00706341	0.092051
DCAF10	365.355	0.494385	0.183556	2.69338	0.00707309	0.092051
PCNX	336.158	-0.43571	0.161771	-2.69338	0.00707307	0.092051
HIST2H2BA	1.71709	1.17956	0.438074	2.6926	0.00708975	0.0921986
ANGPTL3	10.4935	-0.9477	0.352052	-2.69193	0.00710397	0.0923144
LYPLA1	308.39	0.507086	0.188441	2.69096	0.00712475	0.0925151
KIF13B	538.608	-0.623179	0.231624	-2.69047	0.0071351	0.0925802
RP11-390F4.8	2.63479	-1.18673	0.441143	-2.69013	0.00714241	0.0926058
PRDX6	373.29	0.504045	0.187528	2.68783	0.00719178	0.0927498
ARID4B	525.024	-0.418877	0.155843	-2.68781	0.00719215	0.0927498
NUDT3	105.814	0.656285	0.244074	2.68887	0.00716935	0.0927498
KLHL7-AS1	2.33949	1.18403	0.440494	2.68796	0.00718899	0.0927498
EIF4BP6	102.289	0.536129	0.199464	2.68784	0.00719149	0.0927498
ZNF841	87.0111	-0.75211	0.279762	-2.68839	0.00717981	0.0927498
RBFOX2	367.047	-0.479518	0.178417	-2.68762	0.00719629	0.0927498
RP11-12M9.4	11.4517	-0.554138	0.206067	-2.68912	0.00716406	0.0927498
RP11-103C16.2	3.58762	-1.08596	0.404179	-2.68683	0.00721339	0.0928531
TMEM180	33.4314	0.971658	0.361647	2.68675	0.00721501	0.0928531
IGSF6	19.4852	-0.909149	0.338425	-2.68641	0.00722243	0.0928797
NUP210	86.1098	-0.767749	0.2859	-2.68537	0.00724485	0.0930612
HIGD1A	450.099	0.506073	0.188473	2.68513	0.00725024	0.0930612
LSMEM1	10.1661	-1.18425	0.441057	-2.68502	0.00725264	0.0930612
MT-CO3	29786.8	0.569615	0.212257	2.68361	0.00728317	0.093384
OGFOD3	16.8312	0.95075	0.354315	2.68335	0.00728894	0.0933888
CMPK2	50.284	0.973612	0.362982	2.68226	0.0073126	0.0936229
MAD2L1	58.1618	0.926242	0.345434	2.68139	0.0073318	0.0937994
VCL	1322.88	-0.38817	0.144812	-2.6805	0.00735112	0.0939153
ACAT1	49.0257	0.88754	0.331112	2.68048	0.00735168	0.0939153
ALG1L12P	1.81559	1.17625	0.438972	2.67955	0.00737203	0.094106
RP1-117O3.2	6.03016	-1.17976	0.440784	-2.67651	0.00743928	0.0944469
GALNT13	9.14338	1.17195	0.437808	2.67685	0.0074317	0.0944469
TNIK	466.279	-0.670923	0.250706	-2.67613	0.00744774	0.0944469
TNFRSF21	2137.02	-0.579257	0.216337	-2.67757	0.00741591	0.0944469
MKRN1	286.887	0.433463	0.161963	2.67631	0.00744386	0.0944469
LINC00704	12.6173	-1.17366	0.438554	-2.67619	0.00744636	0.0944469
H2AFZP3	11.9815	0.67451	0.251911	2.67757	0.00741579	0.0944469
CTD-2008A1.2	6.02274	-1.06124	0.39642	-2.67705	0.00742731	0.0944469
ZNF431	106.93	-0.710243	0.265244	-2.6777	0.00741295	0.0944469
RPL6P27	369.96	0.491147	0.183575	2.67546	0.00746257	0.0945659
COL22A1	11.3938	-1.10043	0.41143	-2.67465	0.00748083	0.0947281
CENPH	13.0693	1.04578	0.391052	2.67429	0.0074888	0.0947303
ATF6B	172.672	-0.589906	0.220596	-2.67415	0.00749193	0.0947303
LPCAT4	231.267	-0.805401	0.301243	-2.67359	0.00750444	0.0948194
ABHD6	18.6114	0.998638	0.373604	2.67298	0.00751801	0.0948735
ZNF420	26.9032	0.871643	0.326108	2.67287	0.00752059	0.0948735
GGA1	29.5587	-0.923971	0.345711	-2.67267	0.00752513	0.0948735
RBM26	444.206	-0.388577	0.145408	-2.67232	0.00753278	0.094901
RP11-799D4.4	1.48527	1.17367	0.439275	2.67184	0.00754358	0.0949681
AHSA2	42.9357	-0.779947	0.292053	-2.67057	0.00757229	0.0951225
DCBLD1	118.88	-0.652411	0.244278	-2.67077	0.0075677	0.0951225
COMTD1	12.7772	1.03971	0.389294	2.67077	0.00756775	0.0951225
VN1R82P	8.23252	-1.11664	0.418403	-2.66881	0.00761209	0.0955532
KCNJ13	17.274	-0.942388	0.35333	-2.66716	0.00764946	0.0959529
ST6GAL1	400.189	-0.892046	0.334534	-2.66653	0.00766384	0.0960088
GRN	435.854	-0.522583	0.195982	-2.66648	0.00766499	0.0960088
XRN1	1034.72	-0.343709	0.128976	-2.66491	0.0077008	0.096277
C16orf91	10.85	1.12029	0.420402	2.66482	0.00770305	0.096277
TTLL9	1.45323	1.09388	0.41044	2.66514	0.00769571	0.096277
MAT2A	902.534	-0.424406	0.159307	-2.66407	0.00772007	0.096384
AFF4	1602.1	-0.343568	0.128969	-2.66396	0.00772272	0.096384
CTB-152G17.6	18.6153	-0.914502	0.343497	-2.66233	0.00776016	0.0966319
NDUFB9	183.317	0.592324	0.222442	2.66283	0.00774867	0.0966319
COMMD5	18.9179	0.923114	0.346723	2.6624	0.00775859	0.0966319
TAF1C	10.0466	-1.14438	0.429875	-2.66213	0.00776486	0.0966319
FST	9.34633	-1.17414	0.441158	-2.6615	0.00777923	0.0967412
H3F3AP6	7.95046	-0.717495	0.269652	-2.66082	0.00779501	0.0968681
CDC42SE2	688.259	0.421678	0.158504	2.66036	0.00780564	0.0969308
CPSF3	239.304	0.51004	0.191751	2.65991	0.00781604	0.0969329
ATP2A3	74.3978	0.975154	0.366617	2.65987	0.00781699	0.0969329
SH3BP5L	26.7411	-1.0781	0.40546	-2.65896	0.00783829	0.0971276
FGF20	7.06376	1.17319	0.441369	2.65806	0.00785924	0.0973178
FIGN	25.8573	1.158	0.435957	2.65622	0.00790217	0.0976559
SLC9C1	24.5229	-0.966645	0.363868	-2.65658	0.00789366	0.0976559
SLC12A2	3888.99	0.672029	0.253007	2.65617	0.00790344	0.0976559
GNRHR2	1.97392	1.17128	0.441133	2.65517	0.00792696	0.0978725
ABI1	618.945	-0.452015	0.170255	-2.65494	0.00793225	0.0978725
CNOT4	305.254	-0.532089	0.200537	-2.65332	0.00797032	0.0982723
CTTNBP2NL	807.213	-0.40141	0.151343	-2.65232	0.00799404	0.0983925
SRSF12	12.4804	-1.15796	0.436605	-2.65219	0.00799708	0.0983925
MUS81	16.2706	0.914923	0.344956	2.65229	0.00799474	0.0983925
ARHGEF28	287.732	-0.641101	0.241753	-2.65189	0.0080043	0.0984115
RPS4XP13	26.0822	0.732788	0.276372	2.65146	0.00801454	0.0984676
VBP1	91.2288	0.716964	0.270585	2.64968	0.00805686	0.0989175
WDFY1	569.069	-0.444163	0.167699	-2.64858	0.00808315	0.09917
RRP15	186.47	0.590164	0.222938	2.64721	0.00811595	0.0992958
SUB1	266.686	0.445385	0.16828	2.64669	0.00812839	0.0992958
LUCAT1	2.85684	-1.16164	0.438896	-2.64673	0.00812737	0.0992958
HGF	11.3853	-1.15964	0.438061	-2.64721	0.00811582	0.0992958
NXF3	16.822	-1.16726	0.441062	-2.64648	0.00813347	0.0992958
TOP1MT	18.5439	0.909703	0.343585	2.64768	0.00810466	0.0992958
ATP5SL	93.0311	0.727146	0.274713	2.64693	0.00812254	0.0992958
IL17RA	107.132	-0.672153	0.254073	-2.64551	0.00815688	0.0995117
RP11-44F21.5	6.91399	1.09599	0.41438	2.64489	0.00817184	0.0996241
APOL1	302.599	-0.804064	0.304095	-2.64413	0.00819019	0.0997777
ARPC3P1	12.4671	-0.744177	0.281524	-2.64338	0.00820817	0.0999266
GNB4	31.6642	-0.939155	0.355452	-2.64214	0.00823835	0.100224
RP13-582O9.5	9.86689	1.15678	0.437872	2.64183	0.00824586	0.100226
RP11-120M18.2	1.22991	1.1182	0.423296	2.64166	0.00825007	0.100226
LSM4	65.2983	0.763963	0.289324	2.64051	0.00827814	0.100496
PIKFYVE	217.878	-0.415822	0.157546	-2.63937	0.008306	0.10057
NPSR1-AS1	31.5499	-1.1169	0.423179	-2.63931	0.00830743	0.10057
CXorf56	12.1241	0.927769	0.35148	2.63961	0.00830018	0.10057
GPX4	69.4956	0.744382	0.281972	2.63991	0.0082927	0.10057
SNN	43.6155	-0.864957	0.327898	-2.63788	0.00834259	0.100926
UHRF2P1	23.8703	-1.06342	0.403293	-2.63683	0.00836839	0.101167
RPL35AP30	3.41749	0.832488	0.31576	2.63646	0.00837756	0.101207
GPR132	6.4301	-1.1542	0.437862	-2.63599	0.00838925	0.101278
SLTM	752.166	-0.403111	0.152975	-2.63514	0.00841025	0.101391
IL2RB	3.97099	1.16306	0.441366	2.63514	0.00841014	0.101391
ATP6V0D1	180.678	-0.527964	0.200407	-2.63446	0.00842722	0.101525
MRPL55	16.7565	0.7849	0.298017	2.63374	0.00844491	0.101667
RP11-408P14.1	399.195	0.544865	0.207047	2.6316	0.00849848	0.102051
C8orf59	50.3964	0.635985	0.241665	2.63168	0.00849645	0.102051
VPS13B	902.711	-0.421752	0.160269	-2.63152	0.0085003	0.102051
KIAA0586	175.34	-0.567923	0.215813	-2.63155	0.00849951	0.102051
FBXO45	101.41	0.696558	0.264822	2.63029	0.00853131	0.102352
NAALADL2	217.165	-0.567555	0.215837	-2.62956	0.00854958	0.102359
RP11-220I1.1	370.656	0.585676	0.222725	2.62959	0.00854884	0.102359
DICER1	1175.16	-0.337414	0.128295	-2.62998	0.00853891	0.102359
PROSER1	360.191	-0.549862	0.209196	-2.62845	0.00857746	0.102622
SLC27A2	18.6699	1.0759	0.409383	2.6281	0.0085863	0.102657
NPAS2	357.917	-0.499283	0.190026	-2.62745	0.00860276	0.102712
CEACAM1	1190.01	-0.647394	0.246388	-2.62754	0.00860058	0.102712
PALLD	794.894	-0.495452	0.188627	-2.62663	0.00862351	0.102844
SERINC5	104.939	-0.68128	0.259383	-2.62655	0.00862566	0.102844
MAP3K6	22.9261	-0.959472	0.365358	-2.62612	0.00863651	0.102903
TTC13	133.285	-0.754619	0.287382	-2.62584	0.00864344	0.102915
CCDC11	6.06949	1.15287	0.439328	2.62417	0.00868592	0.103349
RP5-1074L1.4	20.4529	-1.06825	0.407172	-2.62358	0.00870111	0.103352
ARL4A	45.045	0.731136	0.278691	2.62347	0.00870402	0.103352
AC005481.5	1.34616	-1.12199	0.427666	-2.62353	0.00870247	0.103352
AC007036.6	1.78583	-1.13463	0.432575	-2.62296	0.00871699	0.103435
RP11-473I1.10	237.329	-0.417745	0.159296	-2.62245	0.00873002	0.103519
RUNX2	122.604	-0.796612	0.303826	-2.62193	0.00874326	0.103605
AC092964.2	11.722	-1.03543	0.395043	-2.62105	0.00876592	0.103803
RP11-552M11.8	8.49583	-1.13955	0.434852	-2.62054	0.00877898	0.103816
RPL26P30	16.5698	0.820454	0.313073	2.62064	0.00877639	0.103816
EFCAB14-AS1	2.98358	-1.15173	0.439623	-2.61981	0.00879794	0.103898
AP000662.9	3.09869	-1.08471	0.414035	-2.61985	0.00879681	0.103898
RBBP6	717.953	-0.428154	0.163471	-2.61914	0.00881508	0.10403
FAM43A	22.8175	-1.02109	0.389897	-2.61886	0.00882245	0.104046
GPATCH3	5.62269	1.14667	0.438119	2.61727	0.00886371	0.104462
COL8A2	10.9865	-1.11674	0.426834	-2.61634	0.00888773	0.104572
TIPARP	314.994	-0.494343	0.188954	-2.61621	0.00889113	0.104572
ZFP36L1	2214.98	-0.580476	0.221865	-2.61634	0.0088877	0.104572
SHH	71.3713	0.811005	0.310053	2.6157	0.00890453	0.104588
KDM4B	38.7954	-0.665547	0.25444	-2.61573	0.0089036	0.104588
ACADM	236.44	0.609554	0.23311	2.61488	0.00892599	0.104707
TPP2	417.49	-0.429829	0.16438	-2.61485	0.00892674	0.104707
IMP4	104.407	0.690904	0.264288	2.61421	0.00894336	0.104717
POLR2G	32.2567	0.90775	0.347249	2.61412	0.0089457	0.104717
RP11-715J22.1	1.05237	1.15089	0.440222	2.61433	0.00894014	0.104717
KIAA0101	27.8503	0.808939	0.309533	2.61342	0.00896415	0.104862
RPS20P4	4.54309	0.930637	0.356373	2.61142	0.00901684	0.105407
RUFY2	211.358	-0.436624	0.167244	-2.6107	0.0090358	0.105558
TERF1P5	9.84011	0.847273	0.324668	2.60966	0.00906316	0.105806
PELO	76.3511	0.751546	0.288034	2.60923	0.00907466	0.105869
ZNF217	871.652	-0.38836	0.148856	-2.60897	0.00908152	0.105878
ELOVL1	196.001	-0.48669	0.186661	-2.60735	0.00912454	0.106308
C12orf44	5.58049	1.12629	0.432052	2.60684	0.00913809	0.106394
SPAST	271.544	0.429434	0.164799	2.6058	0.00916597	0.106622
RBMS1P1	137.434	-0.531876	0.204124	-2.60565	0.00916993	0.106622
SNORA31	8.18235	-1.06843	0.410363	-2.60363	0.0092242	0.107131
TMX1	393.114	0.452734	0.17389	2.60356	0.00922606	0.107131
CTC-559E9.6	3.60119	-1.14665	0.440475	-2.60321	0.00923562	0.10717
HUWE1	1721.54	-0.346515	0.13322	-2.60108	0.00929314	0.107264
CKS2	38.5796	0.88047	0.338484	2.60122	0.00928931	0.107264
COL17A1	1062.8	-0.886369	0.340627	-2.60217	0.00926361	0.107264
SAC3D1	8.86149	1.05036	0.403758	2.60146	0.00928279	0.107264
DYNC2H1	746.555	-0.710406	0.27306	-2.60165	0.00927766	0.107264
TAS2R18	24.3402	-1.05853	0.406757	-2.60237	0.00925812	0.107264
HSDL1	27.0604	0.853149	0.327892	2.60192	0.00927031	0.107264
MN1	49.3338	-1.01624	0.390676	-2.60124	0.00928868	0.107264
LINC00338	6.4842	1.12595	0.433014	2.60027	0.00931512	0.107375
XPOTP1	17.5743	0.672673	0.258692	2.60028	0.00931477	0.107375
FAM49B	300.835	-0.417092	0.160471	-2.59918	0.00934474	0.107644
FGR	10.0072	-1.14537	0.441369	-2.59504	0.00945798	0.108678
RP11-308D16.4	7.18099	-1.11151	0.428332	-2.59498	0.00945956	0.108678
FNBP4	312.281	-0.537119	0.20696	-2.59528	0.00945134	0.108678
HMGB1P10	2.08067	-0.953043	0.367263	-2.59499	0.00945934	0.108678
OLA1	671.623	0.455413	0.17562	2.59317	0.00950951	0.10918
ACP6	198.059	-0.716556	0.27641	-2.59237	0.00953181	0.109364
NUPL2	50.9476	0.660785	0.254923	2.59209	0.00953942	0.109379
RP11-349A22.5	137.001	-0.638327	0.246301	-2.59165	0.00955171	0.109447
TMEM14E	23.2673	-0.954871	0.368492	-2.59129	0.0095617	0.109489
ATP5O	71.5423	0.625647	0.241488	2.5908	0.00957526	0.109572
ITPRIP	26.6682	0.899384	0.347184	2.59051	0.00958341	0.109586
TMEM55B	36.8038	-0.891504	0.34417	-2.5903	0.00958911	0.109586
CTD-3074O7.12	15.7407	1.01918	0.393495	2.59007	0.0095957	0.109589
CRNDE	41.8535	-0.881363	0.340433	-2.58895	0.00962699	0.109874
RP11-317N8.4	2.95022	-0.907261	0.350575	-2.58792	0.0096556	0.110128
MANBA	249.161	-0.544409	0.210415	-2.58731	0.00967279	0.110203
EEF2	2275.32	0.457998	0.177022	2.58724	0.00967488	0.110203
NUDT1	9.21969	0.996616	0.385312	2.58651	0.00969522	0.110363
TPP1	943.413	-0.466876	0.180569	-2.58558	0.00972147	0.110589
MTND4P23	9.68719	-1.13947	0.440854	-2.58468	0.00974695	0.110661
TAF8	59.469	-0.74902	0.289786	-2.58473	0.00974548	0.110661
NDNL2	18.8377	-0.95041	0.367656	-2.58505	0.00973635	0.110661
CSAD	10.9667	-1.07907	0.417707	-2.58331	0.0097858	0.11103
C11orf74	33.9408	0.824456	0.319322	2.5819	0.00982593	0.111412
RPL5P12	4.42318	0.718078	0.2782	2.58115	0.00984708	0.111506
DDX56	105.644	0.620709	0.240465	2.58129	0.00984329	0.111506
H2AFV	525.174	0.443449	0.171845	2.58052	0.00986518	0.111638
RP11-673C5.1	84.7789	-0.558438	0.216429	-2.58023	0.00987344	0.111659
SPATA1	8.51623	-0.931826	0.361196	-2.57983	0.00988476	0.111666
EPC1	314.724	-0.447058	0.173295	-2.57976	0.00988697	0.111666
NAP1L1P1	43.3684	0.586959	0.227578	2.57915	0.00990431	0.111789
PLXNA1	131.268	-0.630662	0.244553	-2.57884	0.00991335	0.111818
RP11-613M5.2	2.74754	0.864319	0.335193	2.57857	0.00992098	0.111832
MRPS16	119.357	0.586526	0.227535	2.57774	0.00994477	0.111882
PRDX3	278.059	0.572676	0.222154	2.57783	0.00994227	0.111882
RP11-800A3.4	12.2067	-1.1235	0.435826	-2.57786	0.00994133	0.111882
RP11-23J18.1	9.71171	-1.13194	0.439232	-2.57709	0.00996347	0.11202
ADAMTS12	76.6388	-0.82939	0.321909	-2.57648	0.00998132	0.112148
THAP2	28.3715	0.754989	0.293069	2.57615	0.00999076	0.112181
PCGF7P	4.15255	0.942483	0.365939	2.57552	0.0100091	0.112314
MTF2	86.2663	-0.653223	0.25371	-2.57468	0.0100331	0.112511
DENND2A	1.26057	1.09024	0.423524	2.57421	0.010047	0.112521
MEIS2	137.162	-0.730186	0.283634	-2.57439	0.0100416	0.112521
DNAJC24	44.0131	-0.843245	0.327724	-2.57303	0.0100811	0.11283
AC073130.3	11.226	-1.06721	0.414818	-2.57271	0.0100906	0.112864
NCAPG	132.82	0.839814	0.326563	2.57168	0.0101207	0.113127
AC062029.1	7.869	1.1233	0.437218	2.5692	0.0101935	0.113487
SETD5-AS1	108.616	-0.733874	0.285646	-2.56917	0.0101941	0.113487
KCNAB1	17.8439	-0.915189	0.356207	-2.56927	0.0101914	0.113487
RP11-84A1.1	7.88351	0.683088	0.265789	2.57004	0.0101686	0.113487
CCDC126	23.6589	0.828731	0.322537	2.56942	0.010187	0.113487
MAP1LC3A	5.54131	1.13061	0.439886	2.57022	0.0101633	0.113487
LSM7	22.0019	0.88915	0.346105	2.56902	0.0101987	0.113487
ZNF589	21.3091	-1.04801	0.408164	-2.56763	0.0102396	0.113597
THAP9-AS1	208.534	-0.620732	0.241758	-2.56758	0.0102412	0.113597
THSD7A	38.2269	-1.03367	0.402568	-2.56769	0.010238	0.113597
FAS	142.529	0.790349	0.307819	2.56758	0.0102411	0.113597
TPT1-AS1	40.0422	-0.738908	0.287768	-2.56772	0.0102368	0.113597
NME5	18.5558	1.08914	0.424401	2.5663	0.0102789	0.113942
RPL4P4	861.266	0.522132	0.203477	2.56606	0.0102862	0.11395
PPIAP22	588.715	0.480467	0.187258	2.5658	0.0102937	0.11396
RP11-575L7.8	1.82227	-1.12425	0.438303	-2.56501	0.0103174	0.114149
EIF4G1	567.147	-0.441577	0.172197	-2.56437	0.0103362	0.114217
EPB41L4A-AS1	25.9247	0.817404	0.318775	2.56421	0.0103412	0.114217
KDM4C	135.656	-0.579331	0.225936	-2.56414	0.0103433	0.114217
CCDC150	11.3625	-1.0569	0.412297	-2.56343	0.0103642	0.114303
PIR	13.4587	0.99143	0.386756	2.56345	0.0103637	0.114303
ADRB1	2.87651	1.10696	0.432006	2.56236	0.0103963	0.114584
TRIM29	589.098	-0.7349	0.287016	-2.56048	0.0104527	0.115133
SMIM18	4.66763	-1.12974	0.441328	-2.55987	0.0104712	0.115263
YAE1D1	143.481	0.726034	0.283691	2.55925	0.01049	0.115396
PDS5B	576.128	-0.416442	0.162833	-2.55748	0.0105434	0.11591
NEXN	33.8133	-0.876373	0.342775	-2.5567	0.010567	0.116023
PDZRN3	9.17281	-1.04102	0.407141	-2.55689	0.0105612	0.116023
RPS17	38.2151	1.08782	0.425618	2.55586	0.0105925	0.11623
PPIL4	218.536	-0.475792	0.186181	-2.55553	0.0106027	0.116268
DNAJC13	555.657	-0.321091	0.125672	-2.555	0.0106189	0.116298
MRI1	15.2358	-1.01101	0.395685	-2.5551	0.0106158	0.116298
SLC26A2	138.053	0.700576	0.274352	2.55357	0.0106625	0.116649
ITM2B	2827.71	-0.392076	0.153544	-2.55351	0.0106644	0.116649
ADAM17	170.411	-0.532382	0.208692	-2.55104	0.0107401	0.117329
ARHGAP17	114.779	-0.632904	0.248086	-2.55115	0.0107369	0.117329
PRKRIRP3	1.22929	1.00527	0.39436	2.54912	0.0107995	0.117831
ZNF441	43.7258	-0.832484	0.326571	-2.54917	0.010798	0.117831
LPP	2659.39	-0.271704	0.106602	-2.54876	0.0108105	0.117868
SCEL	288.668	-0.957651	0.37576	-2.54857	0.0108166	0.117868
CTB-33G10.1	14.635	0.623354	0.244717	2.54724	0.0108578	0.118243
BCDIN3D	10.7831	1.02813	0.403777	2.54628	0.0108877	0.118495
GGT1	29.8987	-0.96377	0.3786	-2.54561	0.0109086	0.118647
RP11-121C2.2	19.9652	0.874835	0.343758	2.54491	0.0109305	0.118811
SCARNA7	7.70255	-0.946147	0.371884	-2.5442	0.0109528	0.118906
SERPINH1	124.21	-0.552255	0.217065	-2.5442	0.010953	0.118906
KDM3A	672.078	-0.431298	0.169571	-2.54347	0.0109759	0.119006
LINC00543	3.29683	1.12203	0.441129	2.54354	0.0109734	0.119006
NBEAL1	1136.83	-0.371766	0.146239	-2.54219	0.0110161	0.11907
EXT2	189.333	-0.539744	0.212308	-2.54228	0.0110133	0.11907
CTD-2007L18.5	1.04134	1.10378	0.434078	2.54282	0.0109963	0.11907
FAM214A	309.756	-0.543672	0.213798	-2.54292	0.0109929	0.11907
SIRPB1	5.90025	1.07139	0.421389	2.54253	0.0110055	0.11907
EPN2	45.2821	-0.724626	0.285075	-2.54188	0.0110258	0.119101
ATP5G1	96.5765	0.625955	0.24636	2.54081	0.0110595	0.119391
AC079922.2	19.0634	0.521453	0.205307	2.53987	0.0110893	0.119563
RPS4XP6	73.6498	0.485103	0.190985	2.54001	0.0110849	0.119563
ILF2	409.82	0.490353	0.193089	2.53952	0.0111004	0.119609
TMEM183A	94.4894	0.575043	0.22648	2.53905	0.0111155	0.119697
CALR	1574.86	-0.388919	0.153196	-2.5387	0.0111264	0.11974
AC069257.8	3.07149	-1.0404	0.409906	-2.53814	0.0111442	0.119857
RP11-416K24.2	6.22296	0.843437	0.3327	2.53513	0.0112407	0.120331
TMEM131	933.044	-0.324486	0.128034	-2.53437	0.011265	0.120331
CLDND1	330.277	-0.433353	0.171094	-2.53284	0.0113143	0.120331
CBLB	420.393	-0.507714	0.200166	-2.53647	0.0111978	0.120331
NDUFS6	51.9834	0.695014	0.274385	2.53299	0.0113094	0.120331
ADH5P4	18.4885	0.611002	0.241217	2.533	0.0113091	0.120331
DDX10P1	4.37899	-1.11216	0.439009	-2.53335	0.0112978	0.120331
TAF5	14.1457	1.03747	0.409452	2.5338	0.0112833	0.120331
IGF2	109.991	-1.07397	0.424049	-2.53266	0.0113201	0.120331
MYRF	283.169	-0.635171	0.25072	-2.53338	0.0112967	0.120331
BACE1	112.128	-0.643692	0.254073	-2.53349	0.0112931	0.120331
ETS1	359.037	-0.504057	0.198954	-2.53353	0.0112921	0.120331
NYNRIN	140.265	-0.766693	0.302428	-2.53513	0.0112406	0.120331
YLPM1	483.863	-0.481714	0.189978	-2.53563	0.0112245	0.120331
TP53BP1	380.178	-0.447443	0.176542	-2.53449	0.0112612	0.120331
MCTP2	159.501	-0.619302	0.244319	-2.53481	0.0112509	0.120331
AQP4-AS1	1.35712	1.04267	0.411156	2.53594	0.0112145	0.120331
ZNF416	23.4205	0.957922	0.377965	2.53442	0.0112635	0.120331
AP000568.2	18.68	-0.626684	0.247194	-2.53519	0.0112388	0.120331
NBPF12	11.8621	-0.894607	0.353426	-2.53125	0.0113658	0.120669
CEP152	88.829	-0.658232	0.260032	-2.53134	0.0113626	0.120669
ANKDD1B	8.82253	-1.09614	0.433142	-2.53067	0.0113844	0.120749
SMURF1	166.478	-0.533283	0.210735	-2.53059	0.0113872	0.120749
ADCY5	8.77689	-1.11616	0.441242	-2.52959	0.0114196	0.121018
AC009495.2	0.955133	1.05085	0.415562	2.52876	0.0114468	0.121035
MSNP1	42.111	-0.678266	0.268221	-2.52875	0.0114468	0.121035
PAXIP1	85.0434	-0.652293	0.257941	-2.52885	0.0114438	0.121035
RPL7P52	4.74846	-1.11567	0.441205	-2.52868	0.0114491	0.121035
AC016735.1	1.43743	1.09846	0.4346	2.52751	0.0114873	0.121365
BTF3L4	480.135	0.37372	0.147955	2.52591	0.01154	0.121787
UAP1	235.761	0.483013	0.191248	2.52559	0.0115506	0.121787
LLPH	44.8735	0.753659	0.298426	2.52544	0.0115553	0.121787
YWHAH	522.465	-0.481646	0.190687	-2.52585	0.0115419	0.121787
ECE1	342.548	-0.579266	0.22945	-2.52459	0.0115834	0.122009
F12	16.5373	1.01433	0.401862	2.52407	0.0116004	0.122114
AC073410.1	0.99494	-1.01601	0.402633	-2.52342	0.011622	0.122267
RP11-399O19.9	1.84967	1.10376	0.437472	2.52303	0.0116349	0.122328
PRRG4	247.951	-0.586026	0.232326	-2.52243	0.0116546	0.122388
MYOM1	48.0921	-0.818311	0.324399	-2.52255	0.0116509	0.122388
MGST3	546.876	0.438117	0.173718	2.522	0.011669	0.122391
ZNF609	292.262	-0.589047	0.233551	-2.52213	0.0116645	0.122391
CBFB	365.724	-0.466455	0.185005	-2.52131	0.0116919	0.122557
RCOR3	231.726	-0.486344	0.19301	-2.51978	0.0117428	0.122788
DYNC1I2	325.466	-0.428677	0.170087	-2.52033	0.0117244	0.122788
NADK2	118.769	0.563003	0.223474	2.51932	0.0117583	0.122788
AC006024.4	2.79588	1.0333	0.410161	2.51925	0.0117604	0.122788
PSPH	31.7845	0.885361	0.351451	2.51916	0.0117635	0.122788
MED11	12.4576	0.990167	0.392959	2.51977	0.0117431	0.122788
BAIAP2	51.6455	-0.828652	0.328805	-2.52019	0.0117291	0.122788
JTB	179.037	0.5101	0.202538	2.51854	0.0117843	0.122857
HACE1	47.975	-0.766899	0.304497	-2.51858	0.011783	0.122857
APLP2	4776.73	-0.425747	0.169075	-2.5181	0.0117991	0.122937
RPL3P4	714.027	0.50041	0.198751	2.51777	0.0118099	0.122976
CREB1	488.202	-0.387056	0.153811	-2.51644	0.0118547	0.123295
RP11-308D16.2	2.70398	-1.10488	0.439052	-2.51651	0.0118524	0.123295
RP5-940J5.6	4.18817	1.09866	0.436639	2.51618	0.0118635	0.123312
KRT18P15	1.73884	0.896204	0.356207	2.51596	0.0118708	0.123314
ADH1C	133.983	1.03942	0.413189	2.51559	0.0118832	0.123369
PMS2CL	31.872	-0.843107	0.335275	-2.51467	0.0119143	0.123618
BTF3P4	5.06458	0.723359	0.287788	2.51352	0.0119534	0.123872
RP11-85G20.1	1.11908	1.0436	0.41522	2.51336	0.0119586	0.123872
RPL31P2	72.4633	0.591148	0.235206	2.51332	0.0119602	0.123872
EPS15L1	59.7534	-0.710987	0.282935	-2.5129	0.0119743	0.123944
RP4-669H2.1	3.69297	-1.10616	0.440244	-2.51261	0.0119843	0.123973
FDPSP1	2.61124	0.95958	0.381995	2.51203	0.0120041	0.1241
UPF3A	74.4754	-0.537896	0.214146	-2.51182	0.0120109	0.1241
TMEM45A	54.6065	-1.03744	0.413088	-2.51144	0.012024	0.124162
RP11-473M20.14	9.24287	1.03551	0.412426	2.51077	0.0120468	0.124323
SPARC	1439.71	-0.661992	0.263702	-2.51038	0.01206	0.124385
ZNF800	357.065	-0.344228	0.137149	-2.50988	0.0120771	0.124488
BHLHE40	2857.43	-0.499909	0.199202	-2.50955	0.0120885	0.124532
NEK2	98.3218	0.845336	0.336885	2.50927	0.0120982	0.124557
PCED1B-AS1	6.43989	-1.08751	0.433481	-2.50878	0.0121149	0.124655
RNU7-48P	1.79478	-1.09275	0.435737	-2.50783	0.0121476	0.124918
LRRN1	501.512	-0.949509	0.378841	-2.50635	0.0121985	0.125145
RP11-368L12.1	6.39994	-1.04185	0.41568	-2.50637	0.0121979	0.125145
ZBTB46	21.3154	0.895393	0.357239	2.50643	0.0121958	0.125145
ELOF1	105.171	0.787943	0.314329	2.50675	0.0121847	0.125145
WNT16	4.29603	-1.0872	0.433844	-2.50596	0.0122118	0.125207
TSPAN8	2110.82	0.746061	0.297744	2.50572	0.0122204	0.125221
RP11-360D2.2	7.9687	-1.10415	0.440777	-2.50501	0.012245	0.125251
FAM204BP	6.32707	-1.06334	0.424463	-2.50514	0.0122402	0.125251
CCDC88B	4.19185	-1.09629	0.437575	-2.50539	0.0122318	0.125251
CCDC80	114.197	-0.70256	0.280492	-2.50474	0.0122541	0.12527
SPTAN1	1021.81	-0.366633	0.146398	-2.50436	0.0122672	0.125331
PHF10	113.465	-0.530512	0.211904	-2.50355	0.0122953	0.125544
PLK4	101.163	0.817088	0.326419	2.50319	0.012308	0.1256
SGIP1	20.8516	-0.95226	0.380466	-2.50288	0.0123188	0.125636
NOTCH2NL	152.228	-0.541121	0.216326	-2.50142	0.0123696	0.126079
ZNF717	96.1778	-0.666374	0.266451	-2.50092	0.012387	0.126183
DCAF4	22.5309	0.959931	0.384025	2.49965	0.0124314	0.126561
RP11-797A18.6	18.2165	-1.0851	0.434203	-2.49905	0.0124526	0.126702
RP5-1185I7.1	8.29244	-1.09584	0.438741	-2.4977	0.0125003	0.127113
EPM2A	8.81985	1.0705	0.428666	2.49729	0.0125146	0.127184
AIDA	96.0544	0.587283	0.235266	2.49625	0.0125514	0.127409
ZNF711	81.2174	-0.765392	0.306601	-2.49638	0.012547	0.127409
SCAF1	38.5496	-0.943892	0.378197	-2.49577	0.0125685	0.127508
AC009480.3	2.5376	-1.10099	0.441351	-2.49459	0.0126103	0.127724
RNA5SP355	1.21469	-1.02794	0.412074	-2.49454	0.0126119	0.127724
GNPNAT1	145.947	0.531619	0.213104	2.49464	0.0126084	0.127724
PSME3	493.527	0.422435	0.16936	2.49431	0.0126204	0.127735
SPTBN1	4962.37	-0.346904	0.139117	-2.49362	0.0126449	0.127834
PHACTR3	63.559	-0.963628	0.386413	-2.49378	0.0126392	0.127834
HINT2	18.6668	0.956513	0.383631	2.49331	0.0126557	0.127869
ANKRD11	444.129	-0.569871	0.228633	-2.49251	0.0126844	0.128084
PWP1	122.871	0.535954	0.215065	2.49205	0.0127007	0.128174
RP13-104F24.3	6.55679	-0.938525	0.37673	-2.49124	0.0127299	0.128394
RP3-405J10.3	16.4338	-1.09188	0.438506	-2.49001	0.0127739	0.128707
MT-ND3	2199.05	0.513334	0.206161	2.48996	0.0127758	0.128707
PHF11	110.998	-0.574919	0.230947	-2.4894	0.0127958	0.128835
XK	75.617	0.880776	0.35385	2.48912	0.0128059	0.128861
ZNF300	56.8547	-0.858765	0.345128	-2.48825	0.0128373	0.129102
RP11-100N21.1	7.77923	0.693536	0.278838	2.48724	0.0128739	0.129395
SOX30	9.53954	1.09255	0.439314	2.48695	0.0128844	0.129426
THNSL1	60.0739	0.722677	0.290694	2.48604	0.0129173	0.129681
PRDX4	148.952	0.520739	0.209488	2.48578	0.0129269	0.129703
CAST	1914.14	-0.404195	0.162643	-2.48517	0.0129489	0.129849
HSPD1	1507.77	0.460433	0.185297	2.48483	0.0129612	0.129896
RPS2P5	93.1798	0.643197	0.258985	2.48353	0.0130089	0.130299
RNF38	343.912	0.471724	0.190011	2.48262	0.0130421	0.130556
BRAF	393.572	-0.415766	0.167485	-2.48241	0.0130497	0.130557
ZNF330	52.9983	0.611158	0.24622	2.48216	0.0130588	0.130573
REL	359.655	-0.491897	0.198321	-2.4803	0.0131272	0.131106
IGF2BP2	277.161	-0.622858	0.251122	-2.4803	0.0131272	0.131106
ANO9	33.3066	-0.882536	0.355854	-2.48005	0.0131363	0.131121
TNS1	207.25	-0.696541	0.280915	-2.47954	0.0131552	0.131234
ARHGAP26-AS1	8.006	-1.06564	0.429892	-2.47885	0.0131808	0.131338
BMS1P10	7.09587	-0.95032	0.383371	-2.47885	0.0131805	0.131338
CCNI2	4.09886	1.06394	0.429506	2.47712	0.0132448	0.131674
RP11-1C8.6	4.90595	-1.08424	0.437669	-2.4773	0.013238	0.131674
VAC14	156.953	-0.615812	0.24858	-2.47732	0.0132374	0.131674
HIC1	1.27904	1.08907	0.43955	2.47769	0.0132235	0.131674
REV3L	279.26	-0.492914	0.199084	-2.4759	0.0132899	0.132047
MAP3K11	38.384	-0.80054	0.323387	-2.47549	0.0133054	0.132125
FAM136A	139.273	0.49908	0.201635	2.47516	0.0133176	0.13217
PTPN22	52.4867	-0.819747	0.331327	-2.47413	0.0133561	0.132289
MEIS1	137.497	-0.774695	0.31307	-2.47451	0.0133418	0.132289
SPATA12	8.47012	-1.09185	0.441302	-2.47415	0.0133554	0.132289
HIST1H2AK	12.0696	0.937996	0.379138	2.47402	0.0133601	0.132289
LRRN2	1.3461	-1.0546	0.426351	-2.47356	0.0133775	0.132386
RNF111	280.636	-0.424147	0.171553	-2.47239	0.0134212	0.132743
QDPR	25.0041	0.811101	0.328179	2.47152	0.0134539	0.132991
RP11-423F24.3	18.1254	0.701278	0.283841	2.47067	0.013486	0.133232
MAD2L2	19.3664	0.879603	0.356141	2.46982	0.0135182	0.133398
LGALS8	362.416	-0.411298	0.166519	-2.46998	0.0135122	0.133398
PLD1	242.022	-0.573142	0.232139	-2.46896	0.0135507	0.133567
TP53I13	9.51253	0.93149	0.377271	2.46902	0.0135483	0.133567
TCEANC2	39.3701	0.793396	0.321515	2.46768	0.0135993	0.133894
RP11-641D5.2	12.4826	-0.962267	0.389935	-2.46776	0.013596	0.133894
AKAP7	13.9469	1.01927	0.413167	2.46697	0.0136263	0.134083
RP11-261C10.5	1.26732	-1.08828	0.441353	-2.46578	0.0136716	0.134243
TRIM27	147.521	-0.626601	0.254124	-2.46573	0.0136735	0.134243
SOX5	130.981	1.06377	0.431394	2.46588	0.0136677	0.134243
NCOA3	896.894	-0.378223	0.153383	-2.46587	0.013668	0.134243
TRIAP1	55.5292	0.735603	0.298515	2.4642	0.0137318	0.134739
ZNF768	20.3565	-0.887555	0.360327	-2.46319	0.0137707	0.135045
NOP10	75.6408	0.618232	0.251022	2.46286	0.0137833	0.135092
CHD9	1261.97	-0.341285	0.138636	-2.46173	0.0138268	0.135289
MT1E	33.854	0.904064	0.367194	2.46209	0.0138131	0.135289
ICT1	63.085	0.734321	0.298293	2.46175	0.0138262	0.135289
KRT8P36	11.2183	-0.592866	0.240892	-2.46113	0.0138502	0.135441
RP11-499P20.2	1.90338	-1.08527	0.441087	-2.46044	0.0138766	0.135624
HLTF	338.442	0.535486	0.217755	2.45912	0.0139278	0.136047
OVOL2	10.4112	0.958006	0.389761	2.45793	0.0139739	0.136392
ATP5E	261.772	0.474163	0.192921	2.45781	0.0139788	0.136392
RP11-597D13.7	6.28887	-0.769422	0.313346	-2.4555	0.0140688	0.136726
GS1-309P15.4	16.3188	-0.828535	0.33738	-2.45579	0.0140574	0.136726
MRRF	137.326	0.546722	0.222642	2.45561	0.0140645	0.136726
LOH12CR1	9.36964	0.921455	0.375262	2.4555	0.0140689	0.136726
OSBPL8	688.353	0.386908	0.15758	2.45532	0.0140761	0.136726
DYNC1H1	1539.57	-0.28858	0.117521	-2.45556	0.0140665	0.136726
FMN1	757.236	-0.53252	0.216855	-2.45565	0.0140632	0.136726
EWSR1	292.994	-0.449765	0.18314	-2.45585	0.014055	0.136726
PRDX1	372.719	0.494675	0.201499	2.45498	0.0140894	0.136779
KCNC4	21.2155	-0.915138	0.372834	-2.45454	0.0141063	0.13679
TRIM16	51.5529	0.641618	0.261397	2.45457	0.0141053	0.13679
RP11-179G5.1	1.68808	0.934748	0.380958	2.45368	0.0141403	0.136966
ZNF138	75.8275	-0.672258	0.273975	-2.45372	0.0141386	0.136966
ANO1	203.711	-0.715041	0.291492	-2.45304	0.0141655	0.137134
RP1-266L20.2	2.88261	1.05685	0.430872	2.45282	0.014174	0.137139
PPP1R16A	14.513	-0.954233	0.38913	-2.45222	0.0141977	0.137292
ZBTB8A	23.5135	-0.904924	0.369136	-2.45146	0.0142277	0.137505
DIS3L2	53.6786	-0.658707	0.268904	-2.4496	0.0143014	0.13814
RP3-375P9.2	10.6379	0.738781	0.301617	2.4494	0.0143093	0.13814
APEX1	622.728	0.450287	0.184026	2.44687	0.0144105	0.139039
RP11-209D14.4	11.0115	-1.07269	0.438441	-2.4466	0.0144211	0.139064
PXMP4	16.1156	0.855161	0.349793	2.44476	0.0144947	0.139697
CKAP2	292.257	0.52446	0.214554	2.44442	0.0145083	0.139751
PAK2	1183.12	-0.293484	0.120081	-2.44406	0.0145232	0.139782
DKC1	278.01	0.464067	0.189916	2.44354	0.0145438	0.139782
ZNF143	100.902	-0.693429	0.283749	-2.44381	0.0145329	0.139782
TOM1L2	31.0991	-0.814777	0.333437	-2.44357	0.0145427	0.139782
PI4K2B	183.684	0.595945	0.243958	2.44282	0.014573	0.139984
RP11-30L15.4	22.2688	-0.865544	0.354363	-2.44254	0.0145844	0.140017
TRERF1	92.9771	-0.668213	0.273679	-2.4416	0.0146224	0.140072
CADPS2	232.037	0.508124	0.208085	2.4419	0.0146103	0.140072
NXF1	145.553	-0.591183	0.242073	-2.44216	0.0145995	0.140072
UBE2G1	326.919	0.435028	0.178162	2.44176	0.014616	0.140072
NUMB	697.965	-0.413857	0.169528	-2.44124	0.0146369	0.140133
AC013410.1	11.7697	-1.0741	0.440054	-2.44083	0.0146535	0.140204
CHORDC1	183.996	-0.541716	0.221955	-2.44066	0.0146604	0.140204
AC003075.4	6.16753	-1.03343	0.423491	-2.44026	0.0146767	0.140204
TRAC	8.51829	1.045	0.428202	2.44044	0.0146696	0.140204
RCOR1	500.699	-0.405315	0.166125	-2.43982	0.0146947	0.140299
PIWIL4	59.0356	-0.818185	0.335395	-2.43947	0.0147089	0.140303
ZNF506	179.608	-0.676602	0.277363	-2.43941	0.0147112	0.140303
PITX2	2.72244	1.00704	0.412959	2.43859	0.0147447	0.140544
TSC22D2	301.735	-0.505228	0.207257	-2.43769	0.0147814	0.14074
RPS10P3	12.4666	0.733589	0.300916	2.43785	0.014775	0.14074
BCAP29	144.559	-0.455775	0.187015	-2.43711	0.0148053	0.14089
ACTB	8966.5	-0.314796	0.129201	-2.43649	0.0148307	0.141054
RBMS2P1	83.336	-0.618439	0.253867	-2.43608	0.0148476	0.141137
PCDH1	1345.37	-0.515942	0.211891	-2.43494	0.0148942	0.141503
HMGN2P35	4.75983	-1.06058	0.43561	-2.43469	0.0149045	0.141523
CBLC	48.3679	-0.75049	0.308276	-2.43447	0.0149135	0.141531
UHMK1	1406.12	0.405806	0.166746	2.43367	0.0149466	0.14169
RPS2P46	173.749	0.55922	0.229784	2.43368	0.0149462	0.14169
ATP11B	1195.87	-0.305685	0.125625	-2.43331	0.0149614	0.141754
GLI2	38.5634	-0.92482	0.380191	-2.43251	0.0149944	0.141989
MIPOL1	186.981	-0.52063	0.214095	-2.43178	0.0150249	0.142149
RP11-64J19.1	5.36804	0.634709	0.261013	2.43171	0.0150277	0.142149
SNAI2	167.65	-0.990266	0.407398	-2.43071	0.0150692	0.142386
RP11-25K19.1	2.76843	1.07019	0.440272	2.43073	0.0150682	0.142386
GCSAM	49.0836	-0.833142	0.342812	-2.43032	0.0150855	0.142462
LUZP1	300.446	-0.518601	0.213424	-2.42991	0.0151026	0.142546
MYEOV2	73.4954	0.669471	0.275555	2.42954	0.0151181	0.142557
RP11-141M1.3	4.65613	-1.06885	0.439948	-2.42949	0.0151202	0.142557
RNF19A	653.642	-0.43835	0.180449	-2.42922	0.0151314	0.142585
MALL	105.849	-0.860003	0.354106	-2.42866	0.0151548	0.142728
RP11-367G18.2	18.1628	0.63414	0.261196	2.42783	0.0151894	0.142821
ATP5LP2	7.20877	0.700509	0.288522	2.42792	0.0151855	0.142821
NDUFB7	39.9981	0.555688	0.228849	2.42819	0.0151745	0.142821
AAK1	198.768	-0.656801	0.270633	-2.4269	0.0152283	0.143032
EYS	46.408	-0.861439	0.354926	-2.4271	0.0152202	0.143032
CTD-2027G2.1	1.55876	1.01905	0.419943	2.42664	0.0152395	0.14306
SF3B5	44.633	0.651892	0.268756	2.42559	0.0152837	0.143397
TXNP6	20.8336	0.618432	0.255025	2.42499	0.0153088	0.143556
NCMAP	101.429	-0.835663	0.344647	-2.42469	0.0153214	0.143596
RRBP1	517.788	-0.538397	0.222093	-2.42419	0.0153424	0.143715
RP11-343H5.4	33.6148	0.672065	0.277303	2.42357	0.0153686	0.143874
ATRAID	124.312	0.480476	0.198265	2.4234	0.015376	0.143874
ULBP2	5.80666	0.998211	0.412012	2.42277	0.0154026	0.14391
AC003989.3	7.36617	-1.04073	0.429554	-2.42282	0.0154003	0.14391
UBE2Q2P1	7.848	-0.910098	0.375664	-2.42264	0.0154081	0.14391
CRYZL1	51.7936	0.633109	0.261342	2.42253	0.015413	0.14391
AP3M1	536.086	0.381145	0.157363	2.42207	0.0154324	0.144014
CDCA5	42.3254	0.846983	0.349815	2.42123	0.015468	0.144268
ANKRD18A	66.1688	-0.733862	0.303152	-2.42078	0.0154874	0.144371
RP11-361K17.2	17.5715	-0.944702	0.390349	-2.42014	0.0155144	0.144455
RP11-619J20.1	4.88078	-1.02561	0.423744	-2.42036	0.015505	0.144455
IL15RA	162.119	-0.710121	0.293441	-2.41998	0.0155213	0.144455
ARL4C	361.618	-0.695936	0.287686	-2.41908	0.0155596	0.144734
RP11-316E14.6	4.71221	-1.06083	0.438607	-2.41864	0.0155788	0.144834
SLC38A9	67.2346	-0.600782	0.248467	-2.41795	0.015608	0.145028
C1orf198	386.838	-0.502143	0.20776	-2.41694	0.0156516	0.145122
BOLA3-AS1	1.90381	1.03975	0.430128	2.4173	0.0156363	0.145122
TIGD6	15.8247	0.907571	0.375425	2.41745	0.0156296	0.145122
MICAL3	65.8842	-0.736388	0.304658	-2.41709	0.015645	0.145122
RPS23	361.655	0.452128	0.187157	2.41576	0.0157022	0.145514
RP11-1148L6.5	50.7637	-0.70774	0.29309	-2.41476	0.0157458	0.145762
PCGF6	19.4156	0.79551	0.329414	2.41492	0.0157385	0.145762
RP11-282E4.1	17.2686	-0.947487	0.392642	-2.4131	0.0158173	0.146346
DPY19L4	243.756	0.407168	0.168811	2.41198	0.0158663	0.146721
IQCC	3.89282	1.06003	0.439558	2.41158	0.0158835	0.146795
EPT1	362.05	0.46044	0.190943	2.41141	0.0158912	0.146795
FAF1	139.881	-0.480215	0.199241	-2.41022	0.0159431	0.147118
RP11-359D14.2	1.80003	-1.05157	0.436282	-2.4103	0.0159396	0.147118
HENMT1	23.4532	0.835509	0.346685	2.41	0.0159526	0.147127
KIF21A	453.933	-0.427595	0.177571	-2.40803	0.016039	0.147688
AC011933.2	1.62162	0.919316	0.381757	2.40812	0.016035	0.147688
ZNF83	154.092	-0.688054	0.285699	-2.40832	0.0160262	0.147688
PRELID1	37.5447	0.589613	0.244921	2.40736	0.0160684	0.147881
COX6CP1	19.7602	0.597997	0.248471	2.40671	0.0160971	0.148018
SNRPB	37.3876	0.597718	0.248363	2.40663	0.0161004	0.148018
AOAH	3.68098	-1.05063	0.436756	-2.40554	0.0161485	0.148303
EIF2S2	237.166	0.407527	0.16941	2.40557	0.0161474	0.148303
RP11-4K3__A.5	155.235	-0.480752	0.200064	-2.40299	0.0162616	0.148422
MZT2B	23.4965	0.59548	0.247711	2.40393	0.0162199	0.148422
WIPF1	113.06	-0.700288	0.29135	-2.40359	0.0162349	0.148422
HERC3	341.485	-0.4735	0.197018	-2.40334	0.0162463	0.148422
TRIM41	34.4494	0.794962	0.330837	2.40288	0.0162665	0.148422
SRPK1	578.299	-0.382233	0.158938	-2.40493	0.0161756	0.148422
TCEANC	21.0686	0.911124	0.379171	2.40294	0.016264	0.148422
SAA2	45.4157	-1.05886	0.440539	-2.40356	0.0162365	0.148422
RPS6KB2	11.603	0.887938	0.369552	2.40274	0.0162727	0.148422
DCN	236.013	-0.6225	0.258916	-2.40426	0.0162054	0.148422
KIAA0355	128.799	-0.589367	0.245151	-2.4041	0.0162122	0.148422
ZNF154	19.8494	-0.960866	0.399858	-2.40302	0.0162603	0.148422
PDGFB	18.4643	-0.933527	0.388267	-2.40435	0.0162015	0.148422
SRGAP2	173.866	-0.492361	0.204947	-2.40239	0.0162885	0.148488
EIF5B	1184.29	-0.379623	0.158078	-2.40149	0.0163283	0.148773
FECH	46.0172	0.785742	0.327288	2.40076	0.0163609	0.148992
MBLAC2	25.6424	0.723754	0.301524	2.40032	0.0163808	0.149046
PPP4R1	388.73	-0.465749	0.194042	-2.40025	0.016384	0.149046
PDIA3	994.849	-0.409645	0.17073	-2.39936	0.0164236	0.149251
SLC9A3R2	44.9237	-0.782134	0.325976	-2.39936	0.0164238	0.149251
COG7	111.551	-0.636762	0.265426	-2.39902	0.0164391	0.149312
HSPE1P13	2.45896	-1.0572	0.440928	-2.39766	0.0165001	0.149521
NBEAL2	142.269	-0.603664	0.251711	-2.39824	0.0164739	0.149521
SLC25A20	15.1507	0.933832	0.389431	2.39794	0.0164877	0.149521
RPL21P39	1.35289	0.898099	0.3746	2.39749	0.0165081	0.149521
RNA5SP37	4.75241	-1.0506	0.43813	-2.39792	0.0164885	0.149521
LZTS3	66.7139	-0.778265	0.324635	-2.39736	0.0165139	0.149521
RREB1	316.205	-0.490203	0.204574	-2.39621	0.0165658	0.149913
ZNF493	121.444	-0.778474	0.324959	-2.3956	0.016593	0.150081
CLEC2D	29.6555	-0.869866	0.363376	-2.39384	0.0166728	0.150724
RFX5	69.6097	0.716657	0.299425	2.39345	0.0166909	0.150809
RP11-430B1.1	1.87789	-1.01548	0.424409	-2.3927	0.0167248	0.151037
RP11-423P10.2	18.1161	-0.907859	0.379495	-2.39228	0.0167439	0.151131
GGACT	6.32388	1.02093	0.426894	2.39154	0.016778	0.15136
RABL5	51.2829	0.783928	0.327898	2.39077	0.0168132	0.151584
DDX27	132.61	-0.541364	0.226454	-2.39061	0.0168203	0.151584
PICALM	1110.16	-0.296033	0.123853	-2.39019	0.0168395	0.151677
RDX	505.74	-0.651495	0.272664	-2.38937	0.0168774	0.151941
CTIF	22.8586	-0.844568	0.35356	-2.38876	0.0169056	0.152115
FCF1P8	1.40017	-0.988932	0.41419	-2.38763	0.0169574	0.152199
HNRNPDL	824.732	-0.268374	0.112409	-2.38748	0.0169642	0.152199
POC5	52.1234	-0.749255	0.313799	-2.38769	0.0169546	0.152199
MDM2	806.266	0.50668	0.212205	2.38769	0.0169546	0.152199
LSR	468.014	-0.524892	0.219858	-2.38741	0.0169675	0.152199
CARD8	82.1165	-0.662579	0.277528	-2.38743	0.0169665	0.152199
DNAJC8	143.456	-0.491098	0.205726	-2.38714	0.0169801	0.152233
TTYH2	2.24207	1.02781	0.430678	2.3865	0.0170094	0.152417
SNHG16	149.011	0.628491	0.263396	2.3861	0.017028	0.152505
SSFA2	1581.75	-0.392012	0.164322	-2.38563	0.0170499	0.152622
TUFT1	111.332	-0.601064	0.252079	-2.38442	0.0171059	0.152926
FAM129A	122.717	-0.768946	0.3225	-2.38433	0.0171103	0.152926
SCAF8	234.059	-0.482152	0.202197	-2.38457	0.0170991	0.152926
GGH	72.775	0.870647	0.365194	2.38407	0.0171224	0.152955
TMEM71	16.272	-1.05133	0.441139	-2.38321	0.0171625	0.153235
FGF5	3.10109	0.967286	0.406067	2.38208	0.017215	0.153425
TCERG1	530.821	-0.372416	0.156346	-2.38199	0.0172192	0.153425
USP45	117.003	-0.58259	0.244543	-2.38236	0.017202	0.153425
RP11-161H23.10	3.79233	-1.05114	0.441213	-2.38238	0.0172011	0.153425
TRNT1	128.712	-0.623873	0.261953	-2.38163	0.0172363	0.153499
LENG8	139.755	-0.639994	0.268757	-2.38132	0.0172509	0.15355
YBX1	697.395	0.434115	0.182323	2.38103	0.0172645	0.153592
RP11-1C8.5	2.72594	0.956777	0.401878	2.38077	0.0172767	0.153622
RP11-544A12.8	5.51328	-1.05069	0.441366	-2.38053	0.0172878	0.153642
FTH1P8	79.6226	0.449653	0.188914	2.38021	0.017303	0.153698
AC091633.2	1.98503	0.856525	0.359883	2.38001	0.0173123	0.153702
TOMM20	898.638	0.418315	0.175787	2.37967	0.017328	0.153763
ATP6V1E1	277.691	-0.422654	0.177677	-2.37878	0.0173701	0.154058
PRPF4B	355.479	-0.414	0.174064	-2.37843	0.0173865	0.154125
TCTA	65.9418	0.752557	0.316436	2.37823	0.0173961	0.15413
TMEM127	427.56	-0.430628	0.181122	-2.37756	0.0174274	0.154329
RP11-544M22.8	4.81732	-1.0382	0.436902	-2.37628	0.0174883	0.154633
GHDC	27.6396	0.754919	0.317659	2.37651	0.0174775	0.154633
THBD	180.881	-0.7527	0.316756	-2.37627	0.0174885	0.154633
EIF3A	2036.68	-0.299554	0.126165	-2.37429	0.0175825	0.155227
RHOT2	35.4548	-0.872883	0.367619	-2.37442	0.0175766	0.155227
ADAMTS1	71.2651	-1.02739	0.432663	-2.37458	0.0175691	0.155227
BMP1	23.1051	-0.913146	0.384731	-2.37346	0.0176221	0.155418
RP11-264I13.2	3.63314	-0.990381	0.417262	-2.37353	0.0176192	0.155418
RP11-421E14.2	17.5944	-0.964024	0.406271	-2.37286	0.0176509	0.155593
AGMAT	7.30922	0.93765	0.395311	2.37193	0.0176955	0.155908
USP9X	1741.8	-0.2737	0.115414	-2.37146	0.0177178	0.155945
GLYR1	180.822	-0.537518	0.226652	-2.37155	0.0177137	0.155945
MT1A	0.901467	0.992667	0.418634	2.3712	0.0177302	0.155976
SPP1	803.225	-0.951693	0.401521	-2.37022	0.0177774	0.156311
YRDC	13.3087	0.8644	0.364748	2.36986	0.0177951	0.156387
RGS3	96.4574	-0.610922	0.257821	-2.36956	0.0178091	0.156432
METTL8	155.6	-0.627393	0.264983	-2.36767	0.0179003	0.15659
HIBADH	236.542	0.477814	0.201783	2.36795	0.0178868	0.15659
TBCAP1	3.19989	0.733852	0.309776	2.36898	0.0178374	0.15659
EFNB2	626.875	-0.509751	0.215311	-2.36751	0.0179084	0.15659
IGHA2	12.8386	-1.03019	0.435085	-2.3678	0.0178944	0.15659
CDH1	2359.97	-0.379525	0.160232	-2.36859	0.0178558	0.15659
CEP112	63.3302	-0.808973	0.34156	-2.36847	0.017862	0.15659
GATAD2A	212.519	-0.463025	0.195506	-2.36834	0.017868	0.15659
HMGXB4	284.196	-0.446997	0.1888	-2.36757	0.0179056	0.15659
HSPG2	525.101	-0.554431	0.234326	-2.36606	0.0179785	0.156646
BIRC6	1506.8	-0.285938	0.120859	-2.36588	0.017987	0.156646
RP11-572C15.6	30.4348	-0.8794	0.371543	-2.36688	0.0179385	0.156646
CYP4V2	441.59	0.541907	0.229026	2.36614	0.0179748	0.156646
FYN	73.072	-0.749447	0.31669	-2.3665	0.0179571	0.156646
GOLGA7B	8.25938	-1.04405	0.441277	-2.36598	0.0179822	0.156646
RP11-134E15.2	82.3545	0.510406	0.21568	2.3665	0.0179572	0.156646
MOCS3	83.0596	0.810778	0.342677	2.36601	0.0179808	0.156646
FBLN2	7.48838	-0.951012	0.40221	-2.36447	0.018056	0.157168
GIPC2	80.9094	0.699587	0.295905	2.36423	0.0180677	0.157191
MLLT1	28.9128	-0.986219	0.417188	-2.36397	0.0180803	0.157222
DPY30	153.006	0.492058	0.208212	2.36325	0.0181153	0.157434
MSANTD2	50.692	-0.73483	0.31096	-2.3631	0.0181229	0.157434
PRR5L	40.8626	-0.876179	0.370902	-2.3623	0.0181621	0.15768
PRKRIR	170.717	0.427728	0.181076	2.36215	0.0181694	0.15768
[truncated: 20,872 more rows]

## Sheet: MSigDB Cluster 1
Overlap Results
Collection(s):	H
# overlaps shown:	10
# genesets in collections:	50
# genes in comparison (n):	309
# genes in universe (N):	45956
Gene Set Name	# Genes in Gene Set (K)	Description	# Genes in Overlap (k)	k/K	p-value	FDR q-value
HALLMARK_EPITHELIAL_MESENCHYMAL_TRANSITION	200	Genes defining epithelial-mesenchymal transition, as in wound healing, fibrosis and metastasis.	36	0.18	1.88e-40	9.41e-39
HALLMARK_ANGIOGENESIS	36	Genes up-regulated during formation of blood vessels (angiogenesis).	8	0.2222	9.8e-11	1.85e-09
HALLMARK_APICAL_JUNCTION	200	Genes encoding components of apical junction complex.	14	0.07	1.11e-10	1.85e-09
HALLMARK_MYOGENESIS	200	Genes involved in development of skeletal muscle (myogenesis).	12	0.06	1.37e-08	1.71e-07
HALLMARK_COAGULATION	138	Genes encoding components of blood coagulation system; also up-regulated in platelets.	9	0.0652	4.49e-07	4.49e-06
HALLMARK_ESTROGEN_RESPONSE_EARLY	200	Genes defining early response to estrogen.	10	0.05	1.19e-06	8.51e-06
HALLMARK_MITOTIC_SPINDLE	200	Genes important for mitotic spindle assembly.	10	0.05	1.19e-06	8.51e-06
HALLMARK_APOPTOSIS	161	Genes mediating programmed cell death (apoptosis) by activation of caspases.	9	0.0559	1.63e-06	1.02e-05
HALLMARK_UV_RESPONSE_DN	144	Genes down-regulated in response to ultraviolet (UV) radiation.	8	0.0556	6.51e-06	3.61e-05
HALLMARK_COMPLEMENT	200	Genes encoding components of the complement system, which is part of the innate immune system.	9	0.045	9.58e-06	4.35e-05
Gene/Gene Set Overlap Matrix
Entrez Gene Id	Gene Symbol	Gene Description	HALLMARK_EPITHELIAL_MESENCHYMAL_TRANSITION	HALLMARK_ANGIOGENESIS	HALLMARK_APICAL_JUNCTION	HALLMARK_MYOGENESIS	HALLMARK_COAGULATION	HALLMARK_ESTROGEN_RESPONSE_EARLY	HALLMARK_MITOTIC_SPINDLE	HALLMARK_APOPTOSIS	HALLMARK_UV_RESPONSE_DN	HALLMARK_COMPLEMENT
1462	VCAN	versican	HALLMARK_EPITHELIAL_MESENCHYMAL_TRANSITION	HALLMARK_ANGIOGENESIS	HALLMARK_APICAL_JUNCTION
1281	COL3A1	collagen, type III, alpha 1	HALLMARK_EPITHELIAL_MESENCHYMAL_TRANSITION	HALLMARK_ANGIOGENESIS		HALLMARK_MYOGENESIS					HALLMARK_UV_RESPONSE_DN
4060	LUM	lumican	HALLMARK_EPITHELIAL_MESENCHYMAL_TRANSITION	HALLMARK_ANGIOGENESIS						HALLMARK_APOPTOSIS
1290	COL5A2	collagen, type V, alpha 2	HALLMARK_EPITHELIAL_MESENCHYMAL_TRANSITION	HALLMARK_ANGIOGENESIS							HALLMARK_UV_RESPONSE_DN
7422	VEGFA	vascular endothelial growth factor A	HALLMARK_EPITHELIAL_MESENCHYMAL_TRANSITION	HALLMARK_ANGIOGENESIS
10631	POSTN	periostin, osteoblast specific factor	HALLMARK_EPITHELIAL_MESENCHYMAL_TRANSITION	HALLMARK_ANGIOGENESIS
11167	FSTL1	follistatin-like 1	HALLMARK_EPITHELIAL_MESENCHYMAL_TRANSITION	HALLMARK_ANGIOGENESIS
4313	MMP2	matrix metallopeptidase 2 (gelatinase A, 72kDa gelatinase, 72kDa type IV collagenase)	HALLMARK_EPITHELIAL_MESENCHYMAL_TRANSITION		HALLMARK_APICAL_JUNCTION		HALLMARK_COAGULATION			HALLMARK_APOPTOSIS
3673	ITGA2	integrin, alpha 2 (CD49B, alpha 2 subunit of VLA-2 receptor)	HALLMARK_EPITHELIAL_MESENCHYMAL_TRANSITION		HALLMARK_APICAL_JUNCTION		HALLMARK_COAGULATION
2200	FBN1	fibrillin 1	HALLMARK_EPITHELIAL_MESENCHYMAL_TRANSITION		HALLMARK_APICAL_JUNCTION		HALLMARK_COAGULATION
3918	LAMC2	laminin, gamma 2	HALLMARK_EPITHELIAL_MESENCHYMAL_TRANSITION		HALLMARK_APICAL_JUNCTION
1009	CDH11	cadherin 11, type 2, OB-cadherin (osteoblast)	HALLMARK_EPITHELIAL_MESENCHYMAL_TRANSITION		HALLMARK_APICAL_JUNCTION
1277	COL1A1	collagen, type I, alpha 1	HALLMARK_EPITHELIAL_MESENCHYMAL_TRANSITION			HALLMARK_MYOGENESIS					HALLMARK_UV_RESPONSE_DN
1293	COL6A3	collagen, type VI, alpha 3	HALLMARK_EPITHELIAL_MESENCHYMAL_TRANSITION			HALLMARK_MYOGENESIS
3908	LAMA2	laminin, alpha 2	HALLMARK_EPITHELIAL_MESENCHYMAL_TRANSITION			HALLMARK_MYOGENESIS
8038	ADAM12	ADAM metallopeptidase domain 12	HALLMARK_EPITHELIAL_MESENCHYMAL_TRANSITION			HALLMARK_MYOGENESIS
7078	TIMP3	TIMP metallopeptidase inhibitor 3	HALLMARK_EPITHELIAL_MESENCHYMAL_TRANSITION				HALLMARK_COAGULATION			HALLMARK_APOPTOSIS
4323	MMP14	matrix metallopeptidase 14 (membrane-inserted)	HALLMARK_EPITHELIAL_MESENCHYMAL_TRANSITION				HALLMARK_COAGULATION					HALLMARK_COMPLEMENT
7057	THBS1	thrombospondin 1	HALLMARK_EPITHELIAL_MESENCHYMAL_TRANSITION				HALLMARK_COAGULATION
4314	MMP3	matrix metallopeptidase 3 (stromelysin 1, progelatinase)	HALLMARK_EPITHELIAL_MESENCHYMAL_TRANSITION				HALLMARK_COAGULATION
960	CD44	CD44 molecule (Indian blood group)	HALLMARK_EPITHELIAL_MESENCHYMAL_TRANSITION					HALLMARK_ESTROGEN_RESPONSE_EARLY		HALLMARK_APOPTOSIS
374	AREG	amphiregulin	HALLMARK_EPITHELIAL_MESENCHYMAL_TRANSITION					HALLMARK_ESTROGEN_RESPONSE_EARLY
667	DST	dystonin	HALLMARK_EPITHELIAL_MESENCHYMAL_TRANSITION						HALLMARK_MITOTIC_SPINDLE
1278	COL1A2	collagen, type I, alpha 2	HALLMARK_EPITHELIAL_MESENCHYMAL_TRANSITION								HALLMARK_UV_RESPONSE_DN
1601	DAB2	disabled homolog 2, mitogen-responsive phosphoprotein (Drosophila)	HALLMARK_EPITHELIAL_MESENCHYMAL_TRANSITION								HALLMARK_UV_RESPONSE_DN
5329	PLAUR	plasminogen activator, urokinase receptor	HALLMARK_EPITHELIAL_MESENCHYMAL_TRANSITION									HALLMARK_COMPLEMENT
966	CD59	CD59 molecule, complement regulatory protein	HALLMARK_EPITHELIAL_MESENCHYMAL_TRANSITION									HALLMARK_COMPLEMENT
1289	COL5A1	collagen, type V, alpha 1	HALLMARK_EPITHELIAL_MESENCHYMAL_TRANSITION
2192	FBLN1	fibulin 1	HALLMARK_EPITHELIAL_MESENCHYMAL_TRANSITION
115908	CTHRC1	collagen triple helix repeat containing 1	HALLMARK_EPITHELIAL_MESENCHYMAL_TRANSITION
1303	COL12A1	collagen, type XII, alpha 1	HALLMARK_EPITHELIAL_MESENCHYMAL_TRANSITION
26585	GREM1	gremlin 1	HALLMARK_EPITHELIAL_MESENCHYMAL_TRANSITION
4017	LOXL2	lysyl oxidase-like 2	HALLMARK_EPITHELIAL_MESENCHYMAL_TRANSITION
7058	THBS2	thrombospondin 2	HALLMARK_EPITHELIAL_MESENCHYMAL_TRANSITION
7168	TPM1	tropomyosin 1 (alpha)	HALLMARK_EPITHELIAL_MESENCHYMAL_TRANSITION
7171	TPM4	tropomyosin 4	HALLMARK_EPITHELIAL_MESENCHYMAL_TRANSITION
5747	PTK2	PTK2 protein tyrosine kinase 2		HALLMARK_ANGIOGENESIS	HALLMARK_APICAL_JUNCTION					HALLMARK_APOPTOSIS
4627	MYH9	myosin, heavy chain 9, non-muscle			HALLMARK_APICAL_JUNCTION	HALLMARK_MYOGENESIS			HALLMARK_MITOTIC_SPINDLE
5921	RASA1	RAS p21 protein activator (GTPase activating protein) 1			HALLMARK_APICAL_JUNCTION				HALLMARK_MITOTIC_SPINDLE
6624	FSCN1	fascin homolog 1, actin-bundling protein (Strongylocentrotus purpuratus)			HALLMARK_APICAL_JUNCTION				HALLMARK_MITOTIC_SPINDLE
87	ACTN1	actinin, alpha 1			HALLMARK_APICAL_JUNCTION
1500	CTNND1	catenin (cadherin-associated protein), delta 1			HALLMARK_APICAL_JUNCTION
3675	ITGA3	integrin, alpha 3 (antigen CD49C, alpha 3 subunit of VLA-3 receptor)			HALLMARK_APICAL_JUNCTION
4478	MSN	moesin			HALLMARK_APICAL_JUNCTION
65055	REEP1	receptor accessory protein 1				HALLMARK_MYOGENESIS		HALLMARK_ESTROGEN_RESPONSE_EARLY
6840	SVIL	supervillin				HALLMARK_MYOGENESIS		HALLMARK_ESTROGEN_RESPONSE_EARLY
165	AEBP1	AE binding protein 1				HALLMARK_MYOGENESIS
2273	FHL1	four and a half LIM domains 1				HALLMARK_MYOGENESIS
4205	MEF2A	myocyte enhancer factor 2A				HALLMARK_MYOGENESIS
4629	MYH11	myosin, heavy chain 11, smooth muscle				HALLMARK_MYOGENESIS
5327	PLAT	plasminogen activator, tissue					HALLMARK_COAGULATION			HALLMARK_APOPTOSIS		HALLMARK_COMPLEMENT
4320	MMP11	matrix metallopeptidase 11 (stromelysin 3)					HALLMARK_COAGULATION
2317	FLNB	filamin B, beta						HALLMARK_ESTROGEN_RESPONSE_EARLY	HALLMARK_MITOTIC_SPINDLE
11057	ABHD2	abhydrolase domain containing 2						HALLMARK_ESTROGEN_RESPONSE_EARLY
2296	FOXC1	forkhead box C1						HALLMARK_ESTROGEN_RESPONSE_EARLY
5420	PODXL	podocalyxin-like						HALLMARK_ESTROGEN_RESPONSE_EARLY
7739	ZNF185	zinc finger protein 185 (LIM domain)						HALLMARK_ESTROGEN_RESPONSE_EARLY
79083	MLPH	melanophilin						HALLMARK_ESTROGEN_RESPONSE_EARLY
5922	RASA2	RAS p21 protein activator 2							HALLMARK_MITOTIC_SPINDLE		HALLMARK_UV_RESPONSE_DN
8476	CDC42BPA	CDC42 binding protein kinase alpha (DMPK-like)							HALLMARK_MITOTIC_SPINDLE		HALLMARK_UV_RESPONSE_DN
4643	MYO1E	myosin IE							HALLMARK_MITOTIC_SPINDLE
11214	AKAP13	A kinase (PRKA) anchor protein 13							HALLMARK_MITOTIC_SPINDLE
23332	CLASP1	cytoplasmic linker associated protein 1							HALLMARK_MITOTIC_SPINDLE
7077	TIMP2	TIMP metallopeptidase inhibitor 2								HALLMARK_APOPTOSIS		HALLMARK_COMPLEMENT
8837	CFLAR	CASP8 and FADD-like apoptosis regulator								HALLMARK_APOPTOSIS
6574	SLC20A1	solute carrier family 20 (phosphate transporter), member 1								HALLMARK_APOPTOSIS
6310	ATXN1	ataxin 1									HALLMARK_UV_RESPONSE_DN
160851	DGKH	diacylglycerol kinase, eta										HALLMARK_COMPLEMENT
23348	DOCK9	dedicator of cytokinesis 9										HALLMARK_COMPLEMENT
4321	MMP12	matrix metallopeptidase 12 (macrophage elastase)										HALLMARK_COMPLEMENT
4322	MMP13	matrix metallopeptidase 13 (collagenase 3)										HALLMARK_COMPLEMENT
9945	GFPT2	glutamine-fructose-6-phosphate transaminase 2
1880	GPR183	G protein-coupled receptor 183
10010	TANK	TRAF family member-associated NFKB activator
57018	CCNL1	cyclin L1
10806	SDCCAG8	serologically defined colon cancer antigen 8
3783	KCNN4	potassium intermediate/small conductance calcium-activated channel, subfamily N, member 4
7476	WNT7A	wingless-type MMTV integration site family, member 7A
6768	ST14	suppression of tumorigenicity 14 (colon carcinoma)
26136	TES	testis derived transcript (3 LIM domains)
26118	WSB1	WD repeat and SOCS box containing 1
4094	MAF	v-maf musculoaponeurotic fibrosarcoma oncogene homolog (avian)
8554	PIAS1	protein inhibitor of activated STAT, 1
4053	LTBP2	latent transforming growth factor beta binding protein 2
5373	PMM2	phosphomannomutase 2
55959	SULF2	sulfatase 2
4848	CNOT2	CCR4-NOT transcription complex, subunit 2
9531	BAG3	BCL2-associated athanogene 3
3091	HIF1A	hypoxia inducible factor 1, alpha subunit (basic helix-loop-helix transcription factor)
22807	IKZF2	IKAROS family zinc finger 2 (Helios)
51747	LUC7L3	LUC7-like 3 (S. cerevisiae)
5411	PNN	pinin, desmosome associated protein
8451	CUL4A	cullin 4A
2841	GPR18	G protein-coupled receptor 18
1606	DGKA	diacylglycerol kinase, alpha 80kDa
9541	CIR1	corepressor interacting with RBPJ, 1
50832	TAS2R4	taste receptor, type 2, member 4
10236	HNRNPR	heterogeneous nuclear ribonucleoprotein R
3267	AGFG1	ArfGAP with FG repeats 1
100130742	LRRC69	leucine rich repeat containing 69
100131755	ARMCX4	armadillo repeat containing, X-linked 4
10180	RBM6	RNA binding motif protein 6
10186	LHFP	lipoma HMGIC fusion partner
10342	TFG	TRK-fused gene
10443	N4BP2L2	NEDD4 binding protein 2-like 2
10464	PIBF1	progesterone immunomodulatory binding factor 1
10466	COG5	component of oligomeric golgi complex 5
10617	STAMBP	STAM binding protein
10699	CORIN	corin, serine peptidase
10956	OS9	osteosarcoma amplified 9, endoplasmic reticulum lectin
11000	SLC27A3	solute carrier family 27 (fatty acid transporter), member 3
11017	SNRNP27	small nuclear ribonucleoprotein 27kDa (U4/U6.U5)
1106	CHD2	chromodomain helicase DNA binding protein 2
11140	CDC37	cell division cycle 37 homolog (S. cerevisiae)
11259	FILIP1L	filamin A interacting protein 1-like
1130	LYST	lysosomal trafficking regulator
114990	VASN	vasorin
115426	UHRF2	ubiquitin-like with PHD and ring finger domains 2
116984	ARAP2	ArfGAP with RhoGAP domain, ankyrin repeat and PH domain 2
1195	CLK1	CDC-like kinase 1
123720	WHAMM	WAS protein homolog associated with actin, golgi membranes and microtubules
124411	ZNF720	zinc finger protein 720
1295	COL8A1	collagen, type VIII, alpha 1
1300	COL10A1	collagen, type X, alpha 1
132014	IL17RE	interleukin 17 receptor E
134957	STXBP5	syntaxin binding protein 5 (tomosyn)
135228	CD109	CD109 molecule
140890	SREK1	splicing regulatory glutamine/lysine-rich protein 1
144100	PLEKHA7	pleckstrin homology domain containing, family A member 7
152137	CCDC50	coiled-coil domain containing 50
154214	RNF217	ring finger protein 217
158401	C9orf84	chromosome 9 open reading frame 84
160857	CCDC122	coiled-coil domain containing 122
1832	DSP	desmoplakin
196441	ZFC3H1	zinc finger, C3H1-type containing
196528	ARID2	AT rich interactive domain 2 (ARID, RFX-like)
197131	UBR1	ubiquitin protein ligase E3 component n-recognin 1
220869	CBWD5	COBW domain containing 5
221037	JMJD1C	jumonji domain containing 1C
221393	GPR115	G protein-coupled receptor 115
221504	ZBTB9	zinc finger and BTB domain containing 9
222236	NAPEPLD	N-acyl phosphatidylethanolamine phospholipase D
222584	FAM83B	family with sequence similarity 83, member B
2252	FGF7	fibroblast growth factor 7
22801	ITGA11	integrin, alpha 11
22985	ACIN1	apoptotic chromatin condensation inducer 1
23001	WDFY3	WD repeat and FYVE domain containing 3
23023	TMCC1	transmembrane and coiled-coil domain family 1
23049	SMG1	smg-1 homolog, phosphatidylinositol 3-kinase-related kinase (C. elegans)
23077	MYCBP2	MYC binding protein 2
23091	ZC3H13	zinc finger CCCH-type containing 13
23213	SULF1	sulfatase 1
23215	PRRC2C	proline-rich coiled-coil 2C
23253	ANKRD12	ankyrin repeat domain 12
23301	EHBP1	EH domain binding protein 1
23499	MACF1	microtubule-actin crosslinking factor 1
23524	SRRM2	serine/arginine repetitive matrix 2
244	ANXA8L2	annexin A8-like 2
253959	RALGAPA1	Ral GTPase activating protein, alpha subunit 1 (catalytic)
254065	BRWD3	bromodomain and WD repeat domain containing 3
254102	EHBP1L1	EH domain binding protein 1-like 1
256643	CXorf23	chromosome X open reading frame 23
257218	SHPRH	SNF2 histone linker PHD RING helicase
259292	TAS2R46	taste receptor, type 2, member 46
25957	PNISR	PNN-interacting serine/arginine-rich protein
26043	UBXN7	UBX domain protein 7
26091	HERC4	hect domain and RLD 4
26273	FBXO3	F-box protein 3
26511	CHIC2	cysteine-rich hydrophobic domain 2
26512	INTS6	integrator complex subunit 6
27327	TNRC6A	trinucleotide repeat containing 6A
283131	NEAT1	nuclear paraspeckle assembly transcript 1 (non-protein coding)
283208	P4HA3	prolyl 4-hydroxylase, alpha polypeptide III
283970	PDXDC2P	pyridoxal-dependent decarboxylase domain containing 2, pseudogene
285830	HLA-F-AS1	HLA-F antisense RNA 1 (non-protein coding)
286046	XKR6	XK, Kell blood group complex subunit-related family, member 6
29035	C16orf72	chromosome 16 open reading frame 72
29072	SETD2	SET domain containing 2
29766	TMOD3	tropomodulin 3 (ubiquitous)
29978	UBQLN2	ubiquilin 2
29994	BAZ2B	bromodomain adjacent to zinc finger domain, 2B
3097	HIVEP2	human immunodeficiency virus type I enhancer binding protein 2
317684	MAPK6PS3	mitogen-activated protein kinase 6 pseudogene 3
319099	DDX18P1	DEAD (Asp-Glu-Ala-Asp) box polypeptide 18 pseudogene 1
338412	TAS2R64P	taste receptor, type 2, member 64 pseudogene
338413	TAS2R63P	taste receptor, type 2, member 63 pseudogene
340252	ZNF680	zinc finger protein 680
340481	ZDHHC21	zinc finger, DHHC-type containing 21
3493	IGHA1	immunoglobulin heavy constant alpha 1
3671	ISLR	immunoglobulin superfamily containing leucine-rich repeat
3694	ITGB6	integrin, beta 6
3710	ITPR3	inositol 1,4,5-trisphosphate receptor, type 3
3743	KCNA7	potassium voltage-gated channel, shaker-related subfamily, member 7
375248	ANKRD36	ankyrin repeat domain 36
378938	MALAT1	metastasis associated lung adenocarcinoma transcript 1 (non-protein coding)
389161	ANKUB1	ankyrin repeat and ubiquitin domain containing 1
3895	KTN1	kinectin 1 (kinesin receptor)
400322	HERC2P2	hect domain and RLD 2 pseudogene 2
4008	LMO7	LIM domain 7
4045	LSAMP	limbic system-associated membrane protein
414132	NANOGP4	Nanog homeobox pseudogene 4
4584	MUC3A	mucin 3A, cell surface associated
4585	MUC4	mucin 4, cell surface associated
4646	MYO6	myosin VI
4676	NAP1L4	nucleosome assembly protein 1-like 4
4820	NKTR	natural killer-tumor recognition sequence
4899	NRF1	nuclear respiratory factor 1
49855	SCAPER	S-phase cyclin A-associated protein in the ER
50618	ITSN2	intersectin 2
50809	HP1BP3	heterochromatin protein 1, binding protein 3
54790	TET2	tet methylcytosine dioxygenase 2
54816	ZNF280D	zinc finger protein 280D
54829	ASPN	asporin
5493	PPL	periplakin
55002	TMCO3	transmembrane and coiled-coil domains 3
55075	UACA	uveal autoantigen with coiled-coil domains and ankyrin repeats
55082	ARGLU1	arginine and glutamate rich 1
55119	PRPF38B	PRP38 pre-mRNA processing factor 38 (yeast) domain containing B
55186	SLC25A36	solute carrier family 25, member 36
55209	SETD5	SET domain containing 5
55593	OTUD5	OTU domain containing 5
55604	LRRC16A	leucine rich repeat containing 16A
55608	ANKRD10	ankyrin repeat domain 10
55689	YEATS2	YEATS domain containing 2
55729	ATF7IP	activating transcription factor 7 interacting protein
55757	UGGT2	UDP-glucose glycoprotein glucosyltransferase 2
5638	PRRG1	proline rich Gla (G-carboxyglutamic acid) 1
56478	EIF4ENIF1	eukaryotic translation initiation factor 4E nuclear import factor 1
57337	SENP7	SUMO1/sentrin specific peptidase 7
57473	ZNF512B	zinc finger protein 512B
57489	ODF2L	outer dense fiber of sperm tails 2-like
57492	ARID1B	AT rich interactive domain 1B (SWI1-like)
57498	KIDINS220	kinase D-interacting substrate, 220kDa
57514	ARHGAP31	Rho GTPase activating protein 31
57584	ARHGAP21	Rho GTPase activating protein 21
57591	MKL1	megakaryoblastic leukemia (translocation) 1
57730	ANKRD36B	ankyrin repeat domain 36B
5782	PTPN12	protein tyrosine phosphatase, non-receptor type 12
5796	PTPRK	protein tyrosine phosphatase, receptor type, K
58517	RBM25	RNA binding motif protein 25
5915	RARB	retinoic acid receptor, beta
5937	RBMS1	RNA binding motif, single stranded interacting protein 1
6423	SFRP2	secreted frizzled-related protein 2
64399	HHIP	hedgehog interacting protein
64770	CCDC14	coiled-coil domain containing 14
64778	FNDC3B	fibronectin type III domain containing 3B
653394	PGM5P1	phosphoglucomutase 5 pseudogene 1
653857	ACTR3C	ARP3 actin-related protein 3 homolog C (yeast)
6581	SLC22A3	solute carrier family 22 (extraneuronal monoamine transporter), member 3
65981	CAPRIN2	caprin family member 2
663	BNIP2	BCL2/adenovirus E1B 19kDa interacting protein 2
729	C6	complement component 6
7402	UTRN	utrophin
7748	ZNF195	zinc finger protein 195
7756	ZNF207	zinc finger protein 207
7782	SLC30A4	solute carrier family 30 (zinc transporter), member 4
7879	RAB7A	RAB7A, member RAS oncogene family
79668	PARP8	poly (ADP-ribose) polymerase family, member 8
79745	CLIP4	CAP-GLY domain containing linker protein family, member 4
79780	CCDC82	coiled-coil domain containing 82
79868	ALG13	asparagine-linked glycosylation 13 homolog (S. cerevisiae)
80013	FAM188A	family with sequence similarity 188, member A
80019	UBTD1	ubiquitin domain containing 1
81035	COLEC12	collectin sub-family member 12
8111	GPR68	G protein-coupled receptor 68
81606	LBH	limb bud and heart development homolog (mouse)
81671	VMP1	vacuole membrane protein 1
84168	ANTXR1	anthrax toxin receptor 1
84182	FAM188B	family with sequence similarity 188, member B
84188	FAR1	fatty acyl CoA reductase 1
84259	DCUN1D5	DCN1, defective in cullin neddylation 1, domain containing 5 (S. cerevisiae)
8473	OGT	O-linked N-acetylglucosamine (GlcNAc) transferase (UDP-N-acetylglucosamine:polypeptide-N-acetylglucosaminyl transferase)
84859	LRCH3	leucine-rich repeats and calponin homology (CH) domain containing 3
85377	MICALL1	MICAL-like 1
85379	KIAA1671	KIAA1671
85495	RPPH1	ribonuclease P RNA component H1
8777	MPDZ	multiple PDZ domain protein
8826	IQGAP1	IQ motif containing GTPase activating protein 1
8925	HERC1	hect (homologous to the E6-AP (UBE3A) carboxyl terminus) domain and RCC1 (CHC1)-like domain (RLD) 1
8943	AP3D1	adaptor-related protein complex 3, delta 1 subunit
905	CCNT2	cyclin T2
9068	ANGPTL1	angiopoietin-like 1
9132	KCNQ4	potassium voltage-gated channel, KQT-like subfamily, member 4
91404	SESTD1	SEC14 and spectrin domains 1
9147	NEMF	nuclear export mediator factor
91661	ZNF765	zinc finger protein 765
9187	SLC24A1	solute carrier family 24 (sodium/potassium/calcium exchanger), member 1
92017	SNX29	sorting nexin 29
9208	LRRFIP1	leucine rich repeat (in FLII) interacting protein 1
92335	STRADA	STE20-related kinase adaptor alpha
92689	FAM114A1	family with sequence similarity 114, member A1
9360	PPIG	peptidylprolyl isomerase G (cyclophilin G)
9406	ZRANB2	zinc finger, RAN-binding domain containing 2
9414	TJP2	tight junction protein 2 (zona occludens 2)
9448	MAP4K4	mitogen-activated protein kinase kinase kinase kinase 4
9578	CDC42BPB	CDC42 binding protein kinase beta (DMPK-like)
9584	RBM39	RNA binding motif protein 39
9668	ZNF432	zinc finger protein 432
9739	SETD1A	SET domain containing 1A
9743	ARHGAP32	Rho GTPase activating protein 32
9766	KIAA0247	KIAA0247
9774	BCLAF1	BCL2-associated transcription factor 1
9777	TM9SF4	transmembrane 9 superfamily protein member 4
9842	PLEKHM1	pleckstrin homology domain containing, family M (with RUN domain) member 1
9887	SMG7	smg-7 homolog, nonsense mediated mRNA decay factor (C. elegans)
9895	TECPR2	tectonin beta-propeller repeat containing 2
9967	THRAP3	thyroid hormone receptor associated protein 3
9988	DMTF1	cyclin D binding myb-like transcription factor 1
9990	SLC12A6	solute carrier family 12 (potassium/chloride transporters), member 6

## Sheet: MSigDB Cluster 2
Overlap Results
Collection(s):	H
# overlaps shown:	14
# genesets in collections:	50
# genes in comparison (n):	277
# genes in universe (N):	45956
Gene Set Name	# Genes in Gene Set (K)	Description	# Genes in Overlap (k)	k/K	p-value	FDR q-value
HALLMARK_OXIDATIVE_PHOSPHORYLATION	200	Genes encoding proteins involved in oxidative phosphorylation.	39	0.195	3.67e-47	1.84e-45
HALLMARK_MYC_TARGETS_V1	200	A subgroup of genes regulated by MYC - version 1 (v1).	34	0.17	5.16e-39	1.29e-37
HALLMARK_FATTY_ACID_METABOLISM	158	Genes encoding proteins involved in metabolism of fatty acids.	13	0.0823	1.78e-11	2.96e-10
HALLMARK_ADIPOGENESIS	200	Genes up-regulated during adipocyte differentiation (adipogenesis).	10	0.05	4.42e-07	4.42e-06
HALLMARK_E2F_TARGETS	200	Genes encoding cell cycle related targets of E2F transcription factors.	10	0.05	4.42e-07	4.42e-06
HALLMARK_MYC_TARGETS_V2	58	A subgroup of genes regulated by MYC - version 2 (v2).	6	0.1034	1.41e-06	1.18e-05
HALLMARK_MTORC1_SIGNALING	200	Genes up-regulated through activation of mTORC1 complex.	7	0.035	0.000228	0.00142
HALLMARK_P53_PATHWAY	200	Genes involved in p53 pathways and networks.	7	0.035	0.000228	0.00142
HALLMARK_UNFOLDED_PROTEIN_RESPONSE	113	Genes up-regulated during unfolded protein response, a cellular stress response related to the endoplasmic reticulum.	5	0.0442	0.000634	0.00352
HALLMARK_XENOBIOTIC_METABOLISM	200	Genes encoding proteins involved in processing of drugs and other xenobiotics.	6	0.03	0.00141	0.00707
HALLMARK_DNA_REPAIR	150	Genes involved in DNA repair.	5	0.0333	0.00223	0.0101
HALLMARK_ALLOGRAFT_REJECTION	200	Genes up-regulated during transplant rejection.	5	0.025	0.00751	0.0268
HALLMARK_G2M_CHECKPOINT	200	Genes involved in the G2/M checkpoint, as in progression through the cell division cycle.	5	0.025	0.00751	0.0268
HALLMARK_GLYCOLYSIS	200	Genes encoding proteins involved in glycolysis and gluconeogenesis.	5	0.025	0.00751	0.0268
Gene/Gene Set Overlap Matrix
Entrez Gene Id	Gene Symbol	Gene Description	HALLMARK_OXIDATIVE_PHOSPHORYLATION	HALLMARK_MYC_TARGETS_V1	HALLMARK_FATTY_ACID_METABOLISM	HALLMARK_ADIPOGENESIS	HALLMARK_E2F_TARGETS	HALLMARK_MYC_TARGETS_V2	HALLMARK_MTORC1_SIGNALING	HALLMARK_P53_PATHWAY	HALLMARK_UNFOLDED_PROTEIN_RESPONSE	HALLMARK_XENOBIOTIC_METABOLISM	HALLMARK_DNA_REPAIR	HALLMARK_ALLOGRAFT_REJECTION	HALLMARK_G2M_CHECKPOINT	HALLMARK_GLYCOLYSIS
4706	NDUFAB1	NADH dehydrogenase (ubiquinone) 1, alpha/beta subcomplex, 1, 8kDa	HALLMARK_OXIDATIVE_PHOSPHORYLATION	HALLMARK_MYC_TARGETS_V1		HALLMARK_ADIPOGENESIS
4191	MDH2	malate dehydrogenase 2, NAD (mitochondrial)	HALLMARK_OXIDATIVE_PHOSPHORYLATION		HALLMARK_FATTY_ACID_METABOLISM	HALLMARK_ADIPOGENESIS										HALLMARK_GLYCOLYSIS
1666	DECR1	2,4-dienoyl CoA reductase 1, mitochondrial	HALLMARK_OXIDATIVE_PHOSPHORYLATION		HALLMARK_FATTY_ACID_METABOLISM	HALLMARK_ADIPOGENESIS
8802	SUCLG1	succinate-CoA ligase, alpha subunit	HALLMARK_OXIDATIVE_PHOSPHORYLATION		HALLMARK_FATTY_ACID_METABOLISM	HALLMARK_ADIPOGENESIS
1632	ECI1	enoyl-CoA delta isomerase 1	HALLMARK_OXIDATIVE_PHOSPHORYLATION		HALLMARK_FATTY_ACID_METABOLISM
6392	SDHD	succinate dehydrogenase complex, subunit D, integral membrane protein	HALLMARK_OXIDATIVE_PHOSPHORYLATION		HALLMARK_FATTY_ACID_METABOLISM
8803	SUCLA2	succinate-CoA ligase, ADP-forming, beta subunit	HALLMARK_OXIDATIVE_PHOSPHORYLATION		HALLMARK_FATTY_ACID_METABOLISM
10975	UQCR11	ubiquinol-cytochrome c reductase, complex III subunit XI	HALLMARK_OXIDATIVE_PHOSPHORYLATION			HALLMARK_ADIPOGENESIS
1349	COX7B	cytochrome c oxidase subunit VIIb	HALLMARK_OXIDATIVE_PHOSPHORYLATION			HALLMARK_ADIPOGENESIS
1351	COX8A	cytochrome c oxidase subunit VIIIA (ubiquitous)	HALLMARK_OXIDATIVE_PHOSPHORYLATION			HALLMARK_ADIPOGENESIS
3945	LDHB	lactate dehydrogenase B	HALLMARK_OXIDATIVE_PHOSPHORYLATION							HALLMARK_P53_PATHWAY
1345	COX6C	cytochrome c oxidase subunit VIc	HALLMARK_OXIDATIVE_PHOSPHORYLATION
10128	LRPPRC	leucine-rich PPR-motif containing	HALLMARK_OXIDATIVE_PHOSPHORYLATION
10632	ATP5L	ATP synthase, H+ transporting, mitochondrial Fo complex, subunit G	HALLMARK_OXIDATIVE_PHOSPHORYLATION
1340	COX6B1	cytochrome c oxidase subunit VIb polypeptide 1 (ubiquitous)	HALLMARK_OXIDATIVE_PHOSPHORYLATION
1350	COX7C	cytochrome c oxidase subunit VIIc	HALLMARK_OXIDATIVE_PHOSPHORYLATION
26521	TIMM8B	translocase of inner mitochondrial membrane 8 homolog B (yeast)	HALLMARK_OXIDATIVE_PHOSPHORYLATION
2746	GLUD1	glutamate dehydrogenase 1	HALLMARK_OXIDATIVE_PHOSPHORYLATION
292	SLC25A5	solute carrier family 25 (mitochondrial carrier; adenine nucleotide translocator), member 5	HALLMARK_OXIDATIVE_PHOSPHORYLATION
3030	HADHA	hydroxyacyl-CoA dehydrogenase/3-ketoacyl-CoA thiolase/enoyl-CoA hydratase (trifunctional protein), alpha subunit	HALLMARK_OXIDATIVE_PHOSPHORYLATION
4697	NDUFA4	NADH dehydrogenase (ubiquinone) 1 alpha subcomplex, 4, 9kDa	HALLMARK_OXIDATIVE_PHOSPHORYLATION
4707	NDUFB1	NADH dehydrogenase (ubiquinone) 1 beta subcomplex, 1, 7kDa	HALLMARK_OXIDATIVE_PHOSPHORYLATION
4709	NDUFB3	NADH dehydrogenase (ubiquinone) 1 beta subcomplex, 3, 12kDa	HALLMARK_OXIDATIVE_PHOSPHORYLATION
4719	NDUFS1	NADH dehydrogenase (ubiquinone) Fe-S protein 1, 75kDa (NADH-coenzyme Q reductase)	HALLMARK_OXIDATIVE_PHOSPHORYLATION
4723	NDUFV1	NADH dehydrogenase (ubiquinone) flavoprotein 1, 51kDa	HALLMARK_OXIDATIVE_PHOSPHORYLATION
498	ATP5A1	ATP synthase, H+ transporting, mitochondrial F1 complex, alpha subunit 1, cardiac muscle	HALLMARK_OXIDATIVE_PHOSPHORYLATION
506	ATP5B	ATP synthase, H+ transporting, mitochondrial F1 complex, beta polypeptide	HALLMARK_OXIDATIVE_PHOSPHORYLATION
517	ATP5G2	ATP synthase, H+ transporting, mitochondrial Fo complex, subunit C2 (subunit 9)	HALLMARK_OXIDATIVE_PHOSPHORYLATION
518	ATP5G3	ATP synthase, H+ transporting, mitochondrial Fo complex, subunit C3 (subunit 9)	HALLMARK_OXIDATIVE_PHOSPHORYLATION
521	ATP5I	ATP synthase, H+ transporting, mitochondrial Fo complex, subunit E	HALLMARK_OXIDATIVE_PHOSPHORYLATION
522	ATP5J	ATP synthase, H+ transporting, mitochondrial Fo complex, subunit F6	HALLMARK_OXIDATIVE_PHOSPHORYLATION
54205	CYCS	cytochrome c, somatic	HALLMARK_OXIDATIVE_PHOSPHORYLATION
6183	MRPS12	mitochondrial ribosomal protein S12	HALLMARK_OXIDATIVE_PHOSPHORYLATION
7381	UQCRB	ubiquinol-cytochrome c reductase binding protein	HALLMARK_OXIDATIVE_PHOSPHORYLATION
7386	UQCRFS1	ubiquinol-cytochrome c reductase, Rieske iron-sulfur polypeptide 1	HALLMARK_OXIDATIVE_PHOSPHORYLATION
7388	UQCRH	ubiquinol-cytochrome c reductase hinge protein	HALLMARK_OXIDATIVE_PHOSPHORYLATION
9167	COX7A2L	cytochrome c oxidase subunit VIIa polypeptide 2 like	HALLMARK_OXIDATIVE_PHOSPHORYLATION
92609	TIMM50	translocase of inner mitochondrial membrane 50 homolog (S. cerevisiae)	HALLMARK_OXIDATIVE_PHOSPHORYLATION
9551	ATP5J2	ATP synthase, H+ transporting, mitochondrial Fo complex, subunit F2	HALLMARK_OXIDATIVE_PHOSPHORYLATION
3015	H2AFZ	H2A histone family, member Z		HALLMARK_MYC_TARGETS_V1	HALLMARK_FATTY_ACID_METABOLISM		HALLMARK_E2F_TARGETS								HALLMARK_G2M_CHECKPOINT
4953	ODC1	ornithine decarboxylase 1		HALLMARK_MYC_TARGETS_V1	HALLMARK_FATTY_ACID_METABOLISM										HALLMARK_G2M_CHECKPOINT
5111	PCNA	proliferating cell nuclear antigen		HALLMARK_MYC_TARGETS_V1			HALLMARK_E2F_TARGETS			HALLMARK_P53_PATHWAY			HALLMARK_DNA_REPAIR
4673	NAP1L1	nucleosome assembly protein 1-like 1		HALLMARK_MYC_TARGETS_V1			HALLMARK_E2F_TARGETS
5901	RAN	RAN, member RAS oncogene family		HALLMARK_MYC_TARGETS_V1			HALLMARK_E2F_TARGETS
3336	HSPE1	heat shock 10kDa protein 1 (chaperonin 10)		HALLMARK_MYC_TARGETS_V1				HALLMARK_MYC_TARGETS_V2	HALLMARK_MTORC1_SIGNALING
4869	NPM1	nucleophosmin (nucleolar phosphoprotein B23, numatrin)		HALLMARK_MYC_TARGETS_V1				HALLMARK_MYC_TARGETS_V2			HALLMARK_UNFOLDED_PROTEIN_RESPONSE			HALLMARK_ALLOGRAFT_REJECTION
11335	CBX3	chromobox homolog 3		HALLMARK_MYC_TARGETS_V1				HALLMARK_MYC_TARGETS_V2
5245	PHB	prohibitin		HALLMARK_MYC_TARGETS_V1				HALLMARK_MYC_TARGETS_V2
3251	HPRT1	hypoxanthine phosphoribosyltransferase 1		HALLMARK_MYC_TARGETS_V1					HALLMARK_MTORC1_SIGNALING			HALLMARK_XENOBIOTIC_METABOLISM	HALLMARK_DNA_REPAIR
5478	PPIA	peptidylprolyl isomerase A (cyclophilin A)		HALLMARK_MYC_TARGETS_V1					HALLMARK_MTORC1_SIGNALING							HALLMARK_GLYCOLYSIS
10399	GNB2L1	guanine nucleotide binding protein (G protein), beta polypeptide 2-like 1		HALLMARK_MYC_TARGETS_V1						HALLMARK_P53_PATHWAY
11260	XPOT	exportin, tRNA (nuclear export receptor for tRNAs)		HALLMARK_MYC_TARGETS_V1							HALLMARK_UNFOLDED_PROTEIN_RESPONSE
55651	NHP2	NHP2 ribonucleoprotein homolog (yeast)		HALLMARK_MYC_TARGETS_V1							HALLMARK_UNFOLDED_PROTEIN_RESPONSE
5683	PSMA2	proteasome (prosome, macropain) subunit, alpha type, 2		HALLMARK_MYC_TARGETS_V1
10574	CCT7	chaperonin containing TCP1, subunit 7 (eta)		HALLMARK_MYC_TARGETS_V1
10575	CCT4	chaperonin containing TCP1, subunit 4 (delta)		HALLMARK_MYC_TARGETS_V1
10576	CCT2	chaperonin containing TCP1, subunit 2 (beta)		HALLMARK_MYC_TARGETS_V1
1207	CLNS1A	chloride channel, nucleotide-sensitive, 1A		HALLMARK_MYC_TARGETS_V1
1933	EEF1B2	eukaryotic translation elongation factor 1 beta 2		HALLMARK_MYC_TARGETS_V1
2091	FBL	fibrillarin		HALLMARK_MYC_TARGETS_V1
6128	RPL6	ribosomal protein L6		HALLMARK_MYC_TARGETS_V1
6146	RPL22	ribosomal protein L22		HALLMARK_MYC_TARGETS_V1
6164	RPL34	ribosomal protein L34		HALLMARK_MYC_TARGETS_V1
6175	RPLP0	ribosomal protein, large, P0		HALLMARK_MYC_TARGETS_V1
6187	RPS2	ribosomal protein S2		HALLMARK_MYC_TARGETS_V1
6188	RPS3	ribosomal protein S3		HALLMARK_MYC_TARGETS_V1
6193	RPS5	ribosomal protein S5		HALLMARK_MYC_TARGETS_V1
6194	RPS6	ribosomal protein S6		HALLMARK_MYC_TARGETS_V1
65005	MRPL9	mitochondrial ribosomal protein L9		HALLMARK_MYC_TARGETS_V1
708	C1QBP	complement component 1, q subcomponent binding protein		HALLMARK_MYC_TARGETS_V1
7203	CCT3	chaperonin containing TCP1, subunit 3 (gamma)		HALLMARK_MYC_TARGETS_V1
9045	RPL14	ribosomal protein L14		HALLMARK_MYC_TARGETS_V1
3422	IDI1	isopentenyl-diphosphate delta isomerase 1			HALLMARK_FATTY_ACID_METABOLISM				HALLMARK_MTORC1_SIGNALING
7358	UGDH	UDP-glucose 6-dehydrogenase			HALLMARK_FATTY_ACID_METABOLISM							HALLMARK_XENOBIOTIC_METABOLISM
9380	GRHPR	glyoxylate reductase/hydroxypyruvate reductase			HALLMARK_FATTY_ACID_METABOLISM
10961	ERP29	endoplasmic reticulum protein 29			HALLMARK_FATTY_ACID_METABOLISM
58505	OSTC	oligosaccharyltransferase complex subunit			HALLMARK_FATTY_ACID_METABOLISM
6573	SLC19A1	solute carrier family 19 (folate transporter), member 1				HALLMARK_ADIPOGENESIS		HALLMARK_MYC_TARGETS_V2
217	ALDH2	aldehyde dehydrogenase 2 family (mitochondrial)				HALLMARK_ADIPOGENESIS						HALLMARK_XENOBIOTIC_METABOLISM
27069	GHITM	growth hormone inducible transmembrane protein				HALLMARK_ADIPOGENESIS
79077	DCTPP1	dCTP pyrophosphatase 1					HALLMARK_E2F_TARGETS	HALLMARK_MYC_TARGETS_V2
10212	DDX39A	DEAD (Asp-Glu-Ala-Asp) box polypeptide 39A					HALLMARK_E2F_TARGETS		HALLMARK_MTORC1_SIGNALING						HALLMARK_G2M_CHECKPOINT
1163	CKS1B	CDC28 protein kinase regulatory subunit 1B					HALLMARK_E2F_TARGETS				HALLMARK_UNFOLDED_PROTEIN_RESPONSE				HALLMARK_G2M_CHECKPOINT
6119	RPA3	replication protein A3, 14kDa					HALLMARK_E2F_TARGETS						HALLMARK_DNA_REPAIR
898	CCNE1	cyclin E1					HALLMARK_E2F_TARGETS
84312	BRMS1L	breast cancer metastasis-suppressor 1-like					HALLMARK_E2F_TARGETS
4793	NFKBIB	nuclear factor of kappa light polypeptide gene enhancer in B-cells inhibitor, beta							HALLMARK_MTORC1_SIGNALING
5464	PPA1	pyrophosphatase (inorganic) 1							HALLMARK_MTORC1_SIGNALING
8673	VAMP8	vesicle-associated membrane protein 8 (endobrevin)								HALLMARK_P53_PATHWAY
25873	RPL36	ribosomal protein L36								HALLMARK_P53_PATHWAY
3094	HINT1	histidine triad nucleotide binding protein 1								HALLMARK_P53_PATHWAY
6206	RPS12	ribosomal protein S12								HALLMARK_P53_PATHWAY
6208	RPS14	ribosomal protein S14									HALLMARK_UNFOLDED_PROTEIN_RESPONSE
645	BLVRB	biliverdin reductase B (flavin reductase (NADPH))										HALLMARK_XENOBIOTIC_METABOLISM
191	AHCY	adenosylhomocysteinase										HALLMARK_XENOBIOTIC_METABOLISM
26007	DAK	dihydroxyacetone kinase 2 homolog (S. cerevisiae)										HALLMARK_XENOBIOTIC_METABOLISM
10978	CLP1	CLP1, cleavage and polyadenylation factor I subunit, homolog (S. cerevisiae)											HALLMARK_DNA_REPAIR
5438	POLR2I	polymerase (RNA) II (DNA directed) polypeptide I, 14.5kDa											HALLMARK_DNA_REPAIR
7163	TPD52	tumor protein D52												HALLMARK_ALLOGRAFT_REJECTION
6170	RPL39	ribosomal protein L39												HALLMARK_ALLOGRAFT_REJECTION
6203	RPS9	ribosomal protein S9												HALLMARK_ALLOGRAFT_REJECTION
6223	RPS19	ribosomal protein S19												HALLMARK_ALLOGRAFT_REJECTION
1841	DTYMK	deoxythymidylate kinase (thymidylate kinase)													HALLMARK_G2M_CHECKPOINT
10456	HAX1	HCLS1 associated protein X-1														HALLMARK_GLYCOLYSIS
7295	TXN	thioredoxin														HALLMARK_GLYCOLYSIS
10020	GNE	glucosamine (UDP-N-acetyl)-2-epimerase/N-acetylmannosamine kinase														HALLMARK_GLYCOLYSIS
3301	DNAJA1	DnaJ (Hsp40) homolog, subfamily A, member 1
10280	SIGMAR1	sigma non-opioid intracellular receptor 1
1968	EIF2S3	eukaryotic translation initiation factor 2, subunit 3 gamma, 52kDa
390916	NUDT19	nudix (nucleoside diphosphate linked moiety X)-type motif 19
5037	PEBP1	phosphatidylethanolamine binding protein 1
51533	PHF7	PHD finger protein 7
2535	FZD2	frizzled family receptor 2
5332	PLCB4	phospholipase C, beta 4
7050	TGIF1	TGFB-induced factor homeobox 1
10209	EIF1	eukaryotic translation initiation factor 1
9019	MPZL1	myelin protein zero-like 1
727	C5	complement component 5
6726	SRP9	signal recognition particle 9kDa
100093630	SNHG8	small nucleolar RNA host gene 8 (non-protein coding)
100128731	OST4	oligosaccharyltransferase 4 homolog (S. cerevisiae)
100131187	TSTD1	thiosulfate sulfurtransferase (rhodanese)-like domain containing 1
10090	UST	uronyl-2-sulfotransferase
10247	HRSP12	heat-responsive protein 12
10329	TMEM5	transmembrane protein 5
10376	TUBA1B	tubulin, alpha 1b
10480	EIF3M	eukaryotic translation initiation factor 3, subunit M
10980	COPS6	COP9 constitutive photomorphogenic homolog subunit 6 (Arabidopsis)
11007	CCDC85B	coiled-coil domain containing 85B
11224	RPL35	ribosomal protein L35
114908	TMEM123	transmembrane protein 123
116730	RPL37P2	ribosomal protein L37 pseudogene 2
120071	GYLTL1B	glycosyltransferase-like 1B
128240	APOA1BP	apolipoprotein A-I binding protein
134266	GRPEL2	GrpE-like 2, mitochondrial (E. coli)
134492	NUDCD2	NudC domain containing 2
140717	RPL37AP1	ribosomal protein L37a pseudogene 1
144193	AMDHD1	amidohydrolase domain containing 1
145767	RPS3AP6	ribosomal protein S3A pseudogene 6
158135	TTLL11	tubulin tyrosine ligase-like family, member 11
158787	RIBC1	RIB43A domain with coiled-coils 1
168451	THAP5	THAP domain containing 5
169200	TMEM64	transmembrane protein 64
1936	EEF1D	eukaryotic translation elongation factor 1 delta (guanine nucleotide exchange protein)
199953	TMEM201	transmembrane protein 201
2197	FAU	Finkel-Biskis-Reilly murine sarcoma virus (FBR-MuSV) ubiquitously expressed
222901	RPL23P8	ribosomal protein L23 pseudogene 8
22970	RPL41P2	ribosomal protein L41 pseudogene 2
22971	RPL41P1	ribosomal protein L41 pseudogene 1
2306	FOXD2	forkhead box D2
23521	RPL13A	ribosomal protein L13a
23658	LSM5	LSM5 homolog, U6 small nuclear RNA associated (S. cerevisiae)
253430	IPMK	inositol polyphosphate multikinase
253986	RPL10AP2	ribosomal protein L10a pseudogene 2
25912	C1orf43	chromosome 1 open reading frame 43
25972	UNC50	unc-50 homolog (C. elegans)
26608	TBL2	transducin (beta)-like 2
27095	TRAPPC3	trafficking protein particle complex 3
27235	COQ2	coenzyme Q2 homolog, prenyltransferase (yeast)
27335	EIF3K	eukaryotic translation initiation factor 3, subunit K
283458	NME2P1	non-metastatic cells 2, protein (NM23B) expressed in, pseudogene 1
285315	C3orf33	chromosome 3 open reading frame 33
285785	RPL39P3	ribosomal protein L39 pseudogene 3
30815	ST6GALNAC6	ST6 (alpha-N-acetyl-neuraminyl-2,3-beta-galactosyl-1,3)-N-acetylgalactosaminide alpha-2,6-sialyltransferase 6
30968	STOML2	stomatin (EPB72)-like 2
317772	HIST2H2AB	histone cluster 2, H2ab
318	NUDT2	nudix (nucleoside diphosphate linked moiety X)-type motif 2
320	APBA1	amyloid beta (A4) precursor protein-binding, family A, member 1
326279	RPL15P2	ribosomal protein L15 pseudogene 2
326310	RPL7AP6	ribosomal protein L7a pseudogene 6
339231	ARL16	ADP-ribosylation factor-like 16
340542	BEX5	brain expressed, X-linked 5
3661	IRF3	interferon regulatory factor 3
377381	RPL24P4	ribosomal protein L24 pseudogene 4
388363	RPS7P1	ribosomal protein S7 pseudogene 1
3899	AFF3	AF4/FMR2 family, member 3
390354	RPL18AP3	ribosomal protein L18a pseudogene 3
391356	PTRHD1	peptidyl-tRNA hydrolase domain containing 1
3921	RPSA	ribosomal protein SA
4254	KITLG	KIT ligand
4736	RPL10A	ribosomal protein L10a
50854	C6orf48	chromosome 6 open reading frame 48
51027	BOLA1	bolA homolog 1 (E. coli)
51121	RPL26L1	ribosomal protein L26-like 1
51142	CHCHD2	coiled-coil-helix-coiled-coil-helix domain containing 2
51258	MRPL51	mitochondrial ribosomal protein L51
51371	POMP	proteasome maturation protein
54543	TOMM7	translocase of outer mitochondrial membrane 7 homolog (yeast)
54840	APTX	aprataxin
54974	THG1L	tRNA-histidine guanylyltransferase 1-like (S. cerevisiae)
54976	C20orf27	chromosome 20 open reading frame 27
5501	PPP1CC	protein phosphatase 1, catalytic subunit, gamma isozyme
55039	TRMT12	tRNA methyltransferase 12 homolog (S. cerevisiae)
55111	PLEKHJ1	pleckstrin homology domain containing, family J member 1
55286	C4orf19	chromosome 4 open reading frame 19
55353	LAPTM4B	lysosomal protein transmembrane 4 beta
55847	CISD1	CDGSH iron sulfur domain 1
56255	TMX4	thioredoxin-related transmembrane protein 4
5686	PSMA5	proteasome (prosome, macropain) subunit, alpha type, 5
5692	PSMB4	proteasome (prosome, macropain) subunit, beta type, 4
5710	PSMD4	proteasome (prosome, macropain) 26S subunit, non-ATPase, 4
57343	ZNF304	zinc finger protein 304
60674	GAS5	growth arrest-specific 5 (non-protein coding)
6124	RPL4	ribosomal protein L4
6125	RPL5	ribosomal protein L5
6126	RPL9P7	ribosomal protein L9 pseudogene 7
6130	RPL7A	ribosomal protein L7a
6132	RPL8	ribosomal protein L8
6134	RPL10	ribosomal protein L10
6135	RPL11	ribosomal protein L11
6136	RPL12	ribosomal protein L12
6137	RPL13	ribosomal protein L13
6138	RPL15	ribosomal protein L15
6142	RPL18A	ribosomal protein L18a
6143	RPL19	ribosomal protein L19
6145	RPL21P1	ribosomal protein L21 pseudogene 1
6152	RPL24	ribosomal protein L24
6154	RPL26	ribosomal protein L26
6155	RPL27	ribosomal protein L27
6156	RPL30	ribosomal protein L30
6157	RPL27A	ribosomal protein L27a
6158	RPL28	ribosomal protein L28
6159	RPL29	ribosomal protein L29
6160	RPL31	ribosomal protein L31
6161	RPL32	ribosomal protein L32
6165	RPL35A	ribosomal protein L35a
6167	RPL37	ribosomal protein L37
6168	RPL37A	ribosomal protein L37a
6169	RPL38	ribosomal protein L38
6176	RPLP1	ribosomal protein, large, P1
6181	RPLP2	ribosomal protein, large, P2
6182	MRPL12	mitochondrial ribosomal protein L12
6191	RPS4X	ribosomal protein S4, X-linked
6201	RPS7	ribosomal protein S7
6202	RPS8	ribosomal protein S8
6205	RPS11	ribosomal protein S11
6207	RPS13	ribosomal protein S13
6209	RPS15	ribosomal protein S15
6210	RPS15A	ribosomal protein S15a
6217	RPS16	ribosomal protein S16
6222	RPS18	ribosomal protein S18
6224	RPS20	ribosomal protein S20
6227	RPS21	ribosomal protein S21
6229	RPS24	ribosomal protein S24
6230	RPS25	ribosomal protein S25
6233	RPS27A	ribosomal protein S27a
6235	RPS29	ribosomal protein S29
644068	RPS14P3	ribosomal protein S14 pseudogene 3
64425	POLR1E	polymerase (RNA) I polypeptide E, 53kDa
65080	MRPL44	mitochondrial ribosomal protein L44
653232	RPL15P3	ribosomal protein L15 pseudogene 3
653308	ASAH2B	N-acylsphingosine amidohydrolase (non-lysosomal ceramidase) 2B
65991	FUNDC2	FUN14 domain containing 2
6613	SUMO2	SMT3 suppressor of mif two 3 homolog 2 (S. cerevisiae)
6635	SNRPE	small nuclear ribonucleoprotein polypeptide E
6748	SSR4	signal sequence receptor, delta
6854	SYN2	synapsin II
7178	TPT1	tumor protein, translationally-controlled 1
7311	UBA52	ubiquitin A-52 residue ribosomal protein fusion product 1
7580	ZNF32	zinc finger protein 32
79095	C9orf16	chromosome 9 open reading frame 16
79135	APOO	apolipoprotein O
7979	SHFM1	split hand/foot malformation (ectrodactyly) type 1
79957	PAQR6	progestin and adipoQ receptor family member VI
80010	RMI1	RMI1, RecQ mediated genome instability 1, homolog (S. cerevisiae)
81572	PDRG1	p53 and DNA-damage regulated 1
84266	ALKBH7	alkB, alkylation repair homolog 7 (E. coli)
8520	HAT1	histone acetyltransferase 1
85824	RPL12P12	ribosomal protein L12 pseudogene 12
8683	SRSF9	serine/arginine-rich splicing factor 9
91272	BOD1	biorientation of chromosomes in cell division 1
9141	PDCD5	programmed cell death 5
92682	RPS15AP1	ribosomal protein S15a pseudogene 1
9349	RPL23	ribosomal protein L23
9386	COX7CP1	cytochrome c oxidase subunit VIIc pseudogene 1
9553	MRPL33	mitochondrial ribosomal protein L33
9556	C14orf2	chromosome 14 open reading frame 2
