# Supplementary material
Source: HighWire-hosted journal article supplement (https://gut.bmj.com/content/68/3/499)
Supplement: inline-supplementary-material-10 [file inline-supplementary-material-10.xlsx]

## Sheet: Sheet1
Primers used
Gene	Forward Sequence	Reverse Sequence
FAM83H-AS1	GAGTTGGGGGAGGCAGGT	CAGCAGCAGCTCTTGTCTTG
LINC00673	CGTGGTGGAATCAGAGGTTT	AACTTCCTGGTGGGAATGTG
LOC101927630	GAGCAAGTCTTGGTTGGACAG	CCGTCCACAACAGGCCAAT
LINC00675	ACTCACGAGGATGTCCGAGA	TGGTGCTTGTGGTTGGTTCT
LINC01133	GCTGTGGTGGAGAGAATGGA	CCCCAGCTTTCCAGATCCAAA
CRNDE	GAGGATGCCACTGGAAATGT	TCTGCGTGACAACTGAGGAT
LINC00035	CCCTAAGTCCCAGCCCTTGA	GCTGAGGTGCTCTGTACCTG
LOC105371267	TACTTCACTGCAGGCTGGTG	AGGTGGGAGGATGACTTGTG
LINC00511	AGGGGCGACTACTGTTACCT	CGTCCAAACAGGCTGGATCT
MET	TGGTGGAAAGAACCTCTCAACA	GCGATGTTGACATGCCACTG
FOXA1	CCAGGATGTTAGGAACTGTGA	GAGTAGGCCTCCTGCGTG
CDH1	CCTTGGAGCCGCAGCC	CTTTGTCGACCGGTGCAATC
SOX9	ACCCGCACTTGCACAACG	CCGTTCTTCACCGACTTCCTCC
GAPDH	GTTCGACAGTCAGCCGCATC	TGAAGGGGTCATTGATGGCA
TBP	GCAAGGGTTTCTGGTTTGCC	GGGTCAGTCCAGTGCCATAA
siRNA
Gene	Company	Cat#	Sense	Antisense
Negative Control	Life Technologies	AM4635
Negative Control	Life Technologies	AM4621
FAM83H-AS1_siRNA1	Life Technologies	n503419	CAACUUAGUUCAUCUGCAtt	UGCAGAUGCCAUAAGGUUGct
FAM83H-AS1_siRNA2	Life Technologies	n503418	GCGAGGAUAUUGAGAAGAAtt	UUCCUUCUCAAUAUCCUCGCtc
LINC00673_siRNA1	Life Technologies	s523606	GAGUGAAUAGUUAACCACATT	UGUGGUUAACUAUUCACUCTG
LINC00673_siRNA2	Life Technologies	s500473	GUGGAUUACUUGGUGUGUATT	UACACACCAAGUAAUCCACGT
MET siRNA	Life Technologies	s8702
Antibodies
Gene	Specie	Company	Cat#
SOX9	rabbit	EMD Millipore	AB5535
P-P44/P42 MAPK (T202/Y204)	rabbit	Cell Signalling	4377
ERK1/2	mouse	Santa Cruz	sc-271270
VIMENTIN (D21H3)	rabbit	Cell Signalling	5741S
MET (25H2)	mouse	Cell Signalling	3127S
Beta-ACTIN	rabbit	Cell Signaling	4970
